# Supplementary material for: Transcriptomic Analysis of the White-rot Basidiomycete Lentinus Squarrosulus to Provide Insights Into Its Lignocellulose Biodegradation Ability
Source: Research Square preprint supplement (doi:10.21203/rs.3.rs-1136812/v1), 2022-01-07
Supplement: Supplementary file 1 [file 85dcebe9f6e07ee46bd4a49e.xls]

## Sheet: GOannotation
TranscriptID	Biological Process	Cellular Component	Molecular Function
Lsqua1	GO:0006355 regulation of transcription, DNA-dependent		GO:0003700 sequence-specific DNA binding transcription factor activity | GO:0043565 sequence-specific DNA binding
Lsqua2	GO:0005975 carbohydrate metabolic process | GO:0016310 phosphorylation	GO:0005576 extracellular region	GO:0016301 kinase activity | GO:0030248 cellulose binding | GO:0016162 cellulose 1,4-beta-cellobiosidase activity
Lsqua3	GO:0005975 carbohydrate metabolic process	GO:0005576 extracellular region	GO:0016162 cellulose 1,4-beta-cellobiosidase activity | GO:0030248 cellulose binding
Lsqua4	GO:0005975 carbohydrate metabolic process	GO:0005576 extracellular region	GO:0016162 cellulose 1,4-beta-cellobiosidase activity | GO:0030248 cellulose binding
Lsqua5	GO:0006468 protein phosphorylation	GO:0005773 vacuole	GO:0005509 calcium ion binding | GO:0004689 phosphorylase kinase activity
Lsqua6	GO:0006950 response to stress		GO:0005524 ATP binding
Lsqua7			GO:0005524 ATP binding
Lsqua8			GO:0005524 ATP binding
Lsqua9	GO:0006412 translation	GO:0009506 plasmodesma | GO:0005886 plasma membrane | GO:0005618 cell wall | GO:0022625 cytosolic large ribosomal subunit | GO:0009507 chloroplast	GO:0003735 structural constituent of ribosome
Lsqua10	GO:0006412 translation	GO:0005840 ribosome	GO:0003735 structural constituent of ribosome
Lsqua11	GO:0055114 oxidation-reduction process		GO:0008270 zinc ion binding | GO:0016491 oxidoreductase activity
Lsqua14	GO:0006261 DNA-dependent DNA replication | GO:0005975 carbohydrate metabolic process		GO:0003887 DNA-directed DNA polymerase activity | GO:0004553 hydrolase activity, hydrolyzing O-glycosyl compounds | GO:0004356 glutamate-ammonia ligase activity | GO:0003677 DNA binding
Lsqua16	GO:0097052 L-kynurenine metabolic process | GO:0034276 kynurenic acid biosynthetic process	GO:0005739 mitochondrion	GO:0030170 pyridoxal phosphate binding | GO:0016212 kynurenine-oxoglutarate transaminase activity
Lsqua17		GO:0000502 proteasome complex
Lsqua20	GO:0006450 regulation of translational fidelity | GO:0006433 prolyl-tRNA aminoacylation	GO:0005737 cytoplasm	GO:0002161 aminoacyl-tRNA editing activity | GO:0004827 proline-tRNA ligase activity | GO:0005524 ATP binding
Lsqua23	GO:0005978 glycogen biosynthetic process	GO:0005739 mitochondrion	GO:0004373 glycogen (starch) synthase activity
Lsqua24	GO:0000226 microtubule cytoskeleton organization	GO:0005815 microtubule organizing center | GO:0000922 spindle pole
Lsqua25	GO:0055114 oxidation-reduction process | GO:0006066 alcohol metabolic process		GO:0050660 flavin adenine dinucleotide binding | GO:0008812 choline dehydrogenase activity
Lsqua26	GO:0055114 oxidation-reduction process | GO:0006066 alcohol metabolic process		GO:0050660 flavin adenine dinucleotide binding | GO:0008812 choline dehydrogenase activity
Lsqua27			GO:0005509 calcium ion binding | GO:0005102 receptor binding
Lsqua28	GO:0006508 proteolysis | GO:0006914 autophagy | GO:0015031 protein transport	GO:0005737 cytoplasm | GO:0005634 nucleus	GO:0008234 cysteine-type peptidase activity
Lsqua29	GO:0006508 proteolysis | GO:0006914 autophagy | GO:0015031 protein transport	GO:0005737 cytoplasm	GO:0008234 cysteine-type peptidase activity
Lsqua31	GO:0008152 metabolic process		GO:0016787 hydrolase activity
Lsqua32			GO:0003676 nucleic acid binding | GO:0000166 nucleotide binding
Lsqua33	GO:0006412 translation	GO:0005840 ribosome	GO:0003735 structural constituent of ribosome
Lsqua34	GO:0006412 translation	GO:0005840 ribosome	GO:0003735 structural constituent of ribosome
Lsqua37	GO:0016310 phosphorylation | GO:0006741 NADP biosynthetic process | GO:0019674 NAD metabolic process		GO:0003951 NAD+ kinase activity
Lsqua38			GO:0008121 ubiquinol-cytochrome-c reductase activity
Lsqua39			GO:0008121 ubiquinol-cytochrome-c reductase activity
Lsqua40			GO:0000166 nucleotide binding | GO:0003723 RNA binding
Lsqua41	GO:0006200 ATP catabolic process | GO:0006414 translational elongation	GO:0005634 nucleus	GO:0003746 translation elongation factor activity | GO:0005524 ATP binding | GO:0016887 ATPase activity
Lsqua44		GO:0009277 fungal-type cell wall	GO:0005199 structural constituent of cell wall
Lsqua46	GO:0009058 biosynthetic process		GO:0016740 transferase activity | GO:0030170 pyridoxal phosphate binding
Lsqua47	GO:0042176 regulation of protein catabolic process | GO:0050790 regulation of catalytic activity | GO:0055114 oxidation-reduction process	GO:0000502 proteasome complex	GO:0051287 NAD binding | GO:0016616 oxidoreductase activity, acting on the CH-OH group of donors, NAD or NADP as acceptor | GO:0030234 enzyme regulator activity
Lsqua48	GO:0055085 transmembrane transport	GO:0016021 integral to membrane
Lsqua49	GO:0006950 response to stress		GO:0005524 ATP binding
Lsqua50	GO:0008152 metabolic process		GO:0004587 ornithine-oxo-acid transaminase activity | GO:0030170 pyridoxal phosphate binding
Lsqua51	GO:0055114 oxidation-reduction process		GO:0016491 oxidoreductase activity
Lsqua52	GO:0055114 oxidation-reduction process		GO:0016491 oxidoreductase activity
Lsqua53	GO:0006413 translational initiation		GO:0003743 translation initiation factor activity
Lsqua54	GO:0055114 oxidation-reduction process | GO:0006066 alcohol metabolic process		GO:0050660 flavin adenine dinucleotide binding | GO:0008812 choline dehydrogenase activity
Lsqua56	GO:0006066 alcohol metabolic process		GO:0004026 alcohol O-acetyltransferase activity
Lsqua57	GO:0006066 alcohol metabolic process		GO:0004026 alcohol O-acetyltransferase activity
Lsqua61	GO:0015991 ATP hydrolysis coupled proton transport | GO:0015986 ATP synthesis coupled proton transport | GO:0006200 ATP catabolic process	GO:0042645 mitochondrial nucleoid | GO:0005754 mitochondrial proton-transporting ATP synthase, catalytic core	GO:0046961 proton-transporting ATPase activity, rotational mechanism | GO:0046933 hydrogen ion transporting ATP synthase activity, rotational mechanism | GO:0005524 ATP binding
Lsqua62	GO:0046417 chorismate metabolic process | GO:0009094 L-phenylalanine biosynthetic process	GO:0005737 cytoplasm	GO:0004106 chorismate mutase activity | GO:0016597 amino acid binding | GO:0004664 prephenate dehydratase activity
Lsqua63	GO:0006777 Mo-molybdopterin cofactor biosynthetic process		GO:0003919 FMN adenylyltransferase activity
Lsqua64	GO:0000160 two-component signal transduction system (phosphorelay) | GO:0035556 intracellular signal transduction | GO:0006508 proteolysis | GO:0023014 signal transduction via phosphorylation event	GO:0005773 vacuole | GO:0016020 membrane	GO:0000156 two-component response regulator activity | GO:0004181 metallocarboxypeptidase activity | GO:0008270 zinc ion binding | GO:0005524 ATP binding | GO:0000155 two-component sensor activity
Lsqua65	GO:0044237 cellular metabolic process		GO:0050662 coenzyme binding | GO:0003824 catalytic activity
Lsqua67	GO:0007189 activation of adenylate cyclase activity by G-protein signaling pathway | GO:0006184 GTP catabolic process		GO:0004871 signal transducer activity | GO:0031683 G-protein beta/gamma-subunit complex binding | GO:0003924 GTPase activity | GO:0001664 G-protein coupled receptor binding | GO:0005525 GTP binding
Lsqua68	GO:0006412 translation	GO:0005840 ribosome	GO:0003735 structural constituent of ribosome
Lsqua71	GO:0015991 ATP hydrolysis coupled proton transport	GO:0000220 vacuolar proton-transporting V-type ATPase, V0 domain	GO:0015078 hydrogen ion transmembrane transporter activity
Lsqua72	GO:0006591 ornithine metabolic process | GO:0006468 protein phosphorylation		GO:0004585 ornithine carbamoyltransferase activity | GO:0016597 amino acid binding | GO:0005524 ATP binding | GO:0004674 protein serine/threonine kinase activity
Lsqua73	GO:0071805 potassium ion transmembrane transport	GO:0008076 voltage-gated potassium channel complex	GO:0005249 voltage-gated potassium channel activity
Lsqua74	GO:0016192 vesicle-mediated transport | GO:0006886 intracellular protein transport | GO:0007040 lysosome organization | GO:0019915 lipid storage	GO:0030131 clathrin adaptor complex
Lsqua75	GO:0006468 protein phosphorylation		GO:0005524 ATP binding | GO:0004674 protein serine/threonine kinase activity
Lsqua76	GO:0006468 protein phosphorylation | GO:0030447 filamentous growth | GO:0031505 fungal-type cell wall organization | GO:0071474 cellular hyperosmotic response | GO:0031098 stress-activated protein kinase signaling cascade		GO:0004708 MAP kinase kinase activity | GO:0004674 protein serine/threonine kinase activity | GO:0005524 ATP binding | GO:0004713 protein tyrosine kinase activity
Lsqua77	GO:0055114 oxidation-reduction process | GO:0006066 alcohol metabolic process		GO:0050660 flavin adenine dinucleotide binding | GO:0008812 choline dehydrogenase activity | GO:0016829 lyase activity
Lsqua78	GO:0006542 glutamine biosynthetic process	GO:0005737 cytoplasm	GO:0004356 glutamate-ammonia ligase activity | GO:0005524 ATP binding
Lsqua79			GO:0003676 nucleic acid binding | GO:0046872 metal ion binding
Lsqua81	GO:0019541 propionate metabolic process | GO:0000002 mitochondrial genome maintenance | GO:0006099 tricarboxylic acid cycle	GO:0005829 cytosol | GO:0042645 mitochondrial nucleoid	GO:0003690 double-stranded DNA binding | GO:0051539 4 iron, 4 sulfur cluster binding | GO:0003994 aconitate hydratase activity | GO:0003697 single-stranded DNA binding
Lsqua82		GO:0016020 membrane
Lsqua83	GO:0018108 peptidyl-tyrosine phosphorylation | GO:0046677 response to antibiotic		GO:0004713 protein tyrosine kinase activity | GO:0005524 ATP binding
Lsqua85	GO:0006784 heme a biosynthetic process | GO:0055114 oxidation-reduction process	GO:0005743 mitochondrial inner membrane	GO:0016627 oxidoreductase activity, acting on the CH-CH group of donors | GO:0016653 oxidoreductase activity, acting on NADH or NADPH, heme protein as acceptor
Lsqua87		GO:0019013 viral nucleocapsid | GO:0030529 ribonucleoprotein complex
Lsqua88	GO:0008152 metabolic process		GO:0016881 acid-amino acid ligase activity
Lsqua89	GO:0006508 proteolysis | GO:0006915 apoptotic process	GO:0005794 Golgi apparatus | GO:0016021 integral to membrane	GO:0004185 serine-type carboxypeptidase activity
Lsqua90			GO:0005509 calcium ion binding
Lsqua91	GO:0008152 metabolic process	GO:0016020 membrane	GO:0016757 transferase activity, transferring glycosyl groups
Lsqua92	GO:0008053 mitochondrial fusion | GO:0006184 GTP catabolic process	GO:0016021 integral to membrane | GO:0005741 mitochondrial outer membrane	GO:0003924 GTPase activity | GO:0005525 GTP binding
Lsqua93	GO:0005975 carbohydrate metabolic process		GO:0004553 hydrolase activity, hydrolyzing O-glycosyl compounds
Lsqua95	GO:0006468 protein phosphorylation		GO:0005524 ATP binding | GO:0004674 protein serine/threonine kinase activity
Lsqua96	GO:0009751 response to salicylic acid stimulus | GO:0009651 response to salt stress | GO:0009739 response to gibberellin stimulus | GO:0009753 response to jasmonic acid stimulus		GO:0046872 metal ion binding | GO:0003677 DNA binding | GO:0003682 chromatin binding
Lsqua97	GO:0006412 translation | GO:0000028 ribosomal small subunit assembly	GO:0022627 cytosolic small ribosomal subunit	GO:0003735 structural constituent of ribosome
Lsqua99	GO:0006412 translation	GO:0005840 ribosome	GO:0003735 structural constituent of ribosome
Lsqua100
Lsqua101	GO:0006520 cellular amino acid metabolic process | GO:0055114 oxidation-reduction process		GO:0016491 oxidoreductase activity
Lsqua102	GO:0008152 metabolic process		GO:0016740 transferase activity
Lsqua103	GO:0008152 metabolic process		GO:0016740 transferase activity
Lsqua104	GO:0006355 regulation of transcription, DNA-dependent	GO:0005634 nucleus	GO:0008270 zinc ion binding | GO:0016407 acetyltransferase activity | GO:0003700 sequence-specific DNA binding transcription factor activity | GO:0004386 helicase activity
Lsqua105	GO:0000079 regulation of cyclin-dependent protein kinase activity | GO:0006355 regulation of transcription, DNA-dependent | GO:0006099 tricarboxylic acid cycle	GO:0016591 DNA-directed RNA polymerase II, holoenzyme	GO:0030976 thiamine pyrophosphate binding | GO:0016746 transferase activity, transferring acyl groups | GO:0019901 protein kinase binding | GO:0004591 oxoglutarate dehydrogenase (succinyl-transferring) activity
Lsqua110	GO:0055085 transmembrane transport | GO:0006200 ATP catabolic process	GO:0016021 integral to membrane	GO:0042626 ATPase activity, coupled to transmembrane movement of substances | GO:0005524 ATP binding
Lsqua111	GO:0034220 ion transmembrane transport	GO:0005886 plasma membrane	GO:0005216 ion channel activity
Lsqua112	GO:0000266 mitochondrial fission | GO:0006184 GTP catabolic process | GO:0016559 peroxisome fission | GO:0000001 mitochondrion inheritance | GO:0051260 protein homooligomerization | GO:0001300 chronological cell aging	GO:0005777 peroxisome | GO:0005741 mitochondrial outer membrane	GO:0005525 GTP binding | GO:0042803 protein homodimerization activity | GO:0003924 GTPase activity
Lsqua114	GO:0044237 cellular metabolic process		GO:0050662 coenzyme binding | GO:0003824 catalytic activity
Lsqua115	GO:0050790 regulation of catalytic activity		GO:0005083 small GTPase regulator activity
Lsqua118	GO:0006298 mismatch repair | GO:0016310 phosphorylation | GO:0007131 reciprocal meiotic recombination	GO:0032390 MutLbeta complex	GO:0030983 mismatched DNA binding | GO:0005524 ATP binding | GO:0016301 kinase activity
Lsqua119	GO:0006278 RNA-dependent DNA replication		GO:0003964 RNA-directed DNA polymerase activity | GO:0003723 RNA binding
Lsqua121	GO:0006367 transcription initiation from RNA polymerase II promoter | GO:0071806 protein transmembrane transport | GO:0006886 intracellular protein transport	GO:0005741 mitochondrial outer membrane | GO:0005634 nucleus	GO:0015450 P-P-bond-hydrolysis-driven protein transmembrane transporter activity | GO:0046982 protein heterodimerization activity
Lsqua122	GO:0032319 regulation of Rho GTPase activity		GO:0005089 Rho guanyl-nucleotide exchange factor activity
Lsqua123	GO:0008152 metabolic process		GO:0004806 triglyceride lipase activity
Lsqua124	GO:0008152 metabolic process		GO:0004806 triglyceride lipase activity
Lsqua125	GO:0016255 attachment of GPI anchor to protein	GO:0042765 GPI-anchor transamidase complex
Lsqua126	GO:0008152 metabolic process		GO:0019239 deaminase activity
Lsqua127	GO:0008152 metabolic process | GO:0051301 cell division		GO:0017111 nucleoside-triphosphatase activity | GO:0005524 ATP binding
Lsqua128	GO:0000398 nuclear mRNA splicing, via spliceosome	GO:0046540 U4/U6 x U5 tri-snRNP complex | GO:0019013 viral nucleocapsid
Lsqua129	GO:0055085 transmembrane transport	GO:0016021 integral to membrane
Lsqua130	GO:0008152 metabolic process		GO:0016881 acid-amino acid ligase activity
Lsqua131	GO:0055085 transmembrane transport	GO:0016021 integral to membrane
Lsqua132	GO:0055085 transmembrane transport	GO:0016021 integral to membrane
Lsqua133	GO:0055085 transmembrane transport	GO:0016021 integral to membrane
Lsqua134			GO:0046872 metal ion binding
Lsqua136	GO:0045150 acetoin catabolic process | GO:0055114 oxidation-reduction process		GO:0019152 acetoin dehydrogenase activity
Lsqua137	GO:0006950 response to stress		GO:0008270 zinc ion binding
Lsqua138	GO:0006414 translational elongation | GO:0032786 positive regulation of transcription elongation, DNA-dependent	GO:0005634 nucleus	GO:0003746 translation elongation factor activity | GO:0008270 zinc ion binding
Lsqua139	GO:0051603 proteolysis involved in cellular protein catabolic process	GO:0005737 cytoplasm | GO:0005839 proteasome core complex | GO:0005634 nucleus	GO:0004298 threonine-type endopeptidase activity
Lsqua140	GO:0006099 tricarboxylic acid cycle		GO:0051287 NAD binding | GO:0004449 isocitrate dehydrogenase (NAD+) activity | GO:0000287 magnesium ion binding
Lsqua144		GO:0016021 integral to membrane | GO:0005740 mitochondrial envelope
Lsqua145	GO:0043086 negative regulation of catalytic activity | GO:0006508 proteolysis		GO:0042802 identical protein binding | GO:0004252 serine-type endopeptidase activity
Lsqua146	GO:0006464 protein modification process		GO:0008641 small protein activating enzyme activity | GO:0005524 ATP binding
Lsqua148	GO:0008152 metabolic process		GO:0000250 lanosterol synthase activity
Lsqua149	GO:0055114 oxidation-reduction process | GO:0009231 riboflavin biosynthetic process	GO:0016459 myosin complex | GO:0030479 actin cortical patch	GO:0004746 riboflavin synthase activity | GO:0016491 oxidoreductase activity | GO:0005524 ATP binding | GO:0003774 motor activity | GO:0003779 actin binding
Lsqua150	GO:0005975 carbohydrate metabolic process | GO:0046168 glycerol-3-phosphate catabolic process | GO:0016192 vesicle-mediated transport | GO:0055114 oxidation-reduction process	GO:0016020 membrane | GO:0009331 glycerol-3-phosphate dehydrogenase complex	GO:0051287 NAD binding | GO:0004367 glycerol-3-phosphate dehydrogenase [NAD+] activity
Lsqua151	GO:0005975 carbohydrate metabolic process | GO:0046168 glycerol-3-phosphate catabolic process | GO:0016192 vesicle-mediated transport | GO:0055114 oxidation-reduction process	GO:0016020 membrane | GO:0009331 glycerol-3-phosphate dehydrogenase complex	GO:0051287 NAD binding | GO:0004367 glycerol-3-phosphate dehydrogenase [NAD+] activity
Lsqua153	GO:0034501 protein localization to kinetochore | GO:0016576 histone dephosphorylation | GO:0005977 glycogen metabolic process | GO:0031297 replication fork processing | GO:0007114 cell budding | GO:0030437 ascospore formation | GO:0000903 regulation of cell shape during vegetative growth phase | GO:0000077 DNA damage checkpoint | GO:0007059 chromosome segregation | GO:0009408 response to heat | G…	GO:0001400 mating projection base | GO:0005847 mRNA cleavage and polyadenylation specificity factor complex | GO:0000778 condensed nuclear chromosome kinetochore | GO:0005935 cellular bud neck | GO:0000164 protein phosphatase type 1 complex | GO:0005730 nucleolus | GO:0005816 spindle pole body	GO:0004722 protein serine/threonine phosphatase activity
Lsqua154	GO:0006367 transcription initiation from RNA polymerase II promoter | GO:0071806 protein transmembrane transport | GO:0006886 intracellular protein transport | GO:0006950 response to stress	GO:0005741 mitochondrial outer membrane | GO:0005634 nucleus	GO:0015450 P-P-bond-hydrolysis-driven protein transmembrane transporter activity | GO:0046982 protein heterodimerization activity
Lsqua155	GO:0006367 transcription initiation from RNA polymerase II promoter | GO:0071806 protein transmembrane transport | GO:0006886 intracellular protein transport | GO:0006950 response to stress	GO:0005741 mitochondrial outer membrane | GO:0005634 nucleus	GO:0015450 P-P-bond-hydrolysis-driven protein transmembrane transporter activity | GO:0046982 protein heterodimerization activity
Lsqua158		GO:0019013 viral nucleocapsid | GO:0030529 ribonucleoprotein complex
Lsqua159	GO:0006672 ceramide metabolic process	GO:0016021 integral to membrane	GO:0016811 hydrolase activity, acting on carbon-nitrogen (but not peptide) bonds, in linear amides
Lsqua162	GO:0008152 metabolic process		GO:0008080 N-acetyltransferase activity
Lsqua163	GO:0007165 signal transduction | GO:0006289 nucleotide-excision repair	GO:0005634 nucleus	GO:0004871 signal transducer activity | GO:0003684 damaged DNA binding
Lsqua164	GO:0006468 protein phosphorylation		GO:0005524 ATP binding | GO:0004674 protein serine/threonine kinase activity
Lsqua165	GO:0006508 proteolysis		GO:0004190 aspartic-type endopeptidase activity
Lsqua166	GO:0006355 regulation of transcription, DNA-dependent	GO:0000785 chromatin | GO:0005634 nucleus	GO:0003677 DNA binding
Lsqua167	GO:0008152 metabolic process		GO:0016787 hydrolase activity
Lsqua168	GO:0019878 lysine biosynthetic process via aminoadipic acid	GO:0005634 nucleus | GO:0005739 mitochondrion	GO:0004410 homocitrate synthase activity
Lsqua171	GO:0018342 protein prenylation		GO:0008318 protein prenyltransferase activity
Lsqua173	GO:0015851 nucleobase transport	GO:0016020 membrane	GO:0015205 nucleobase transmembrane transporter activity
Lsqua174	GO:0055114 oxidation-reduction process	GO:0005740 mitochondrial envelope	GO:0046872 metal ion binding | GO:0004129 cytochrome-c oxidase activity
Lsqua175	GO:0006412 translation	GO:0005840 ribosome	GO:0003735 structural constituent of ribosome | GO:0000166 nucleotide binding
Lsqua176	GO:0015992 proton transport | GO:0055114 oxidation-reduction process	GO:0016021 integral to membrane	GO:0008750 NAD(P)+ transhydrogenase (AB-specific) activity | GO:0050661 NADP binding
Lsqua177	GO:0055114 oxidation-reduction process		GO:0050660 flavin adenine dinucleotide binding | GO:0003995 acyl-CoA dehydrogenase activity
Lsqua178	GO:0006457 protein folding | GO:0006184 GTP catabolic process	GO:0005783 endoplasmic reticulum	GO:0005509 calcium ion binding | GO:0003924 GTPase activity | GO:0051082 unfolded protein binding | GO:0005525 GTP binding
Lsqua179	GO:0006468 protein phosphorylation | GO:0032851 positive regulation of Rab GTPase activity		GO:0004674 protein serine/threonine kinase activity | GO:0005097 Rab GTPase activator activity | GO:0005524 ATP binding
Lsqua180	GO:0032259 methylation | GO:0046939 nucleotide phosphorylation	GO:0005739 mitochondrion	GO:0004017 adenylate kinase activity | GO:0005524 ATP binding | GO:0008168 methyltransferase activity
Lsqua182	GO:0008152 metabolic process		GO:0016874 ligase activity
Lsqua183	GO:0055114 oxidation-reduction process		GO:0016491 oxidoreductase activity
Lsqua184	GO:0006099 tricarboxylic acid cycle | GO:0006097 glyoxylate cycle		GO:0004474 malate synthase activity
Lsqua187	GO:0008152 metabolic process		GO:0003824 catalytic activity | GO:0000287 magnesium ion binding | GO:0030976 thiamine pyrophosphate binding
Lsqua188	GO:0006200 ATP catabolic process		GO:0003676 nucleic acid binding | GO:0008026 ATP-dependent helicase activity | GO:0005524 ATP binding
Lsqua189	GO:0007186 G-protein coupled receptor signaling pathway | GO:0055114 oxidation-reduction process	GO:0005834 heterotrimeric G-protein complex | GO:0016021 integral to membrane | GO:0005783 endoplasmic reticulum	GO:0004871 signal transducer activity | GO:0031418 L-ascorbic acid binding | GO:0005506 iron ion binding | GO:0016706 oxidoreductase activity, acting on paired donors, with incorporation or reduction of molecular oxygen, 2-oxoglutarate as one donor, and incorporation of one atom each of oxygen into both donors | GO:0016758 transferase activity, transferring hexosyl groups
Lsqua190			GO:0046983 protein dimerization activity
Lsqua191	GO:0005975 carbohydrate metabolic process		GO:0004553 hydrolase activity, hydrolyzing O-glycosyl compounds
Lsqua192		GO:0016021 integral to membrane | GO:0031985 Golgi cisterna
Lsqua193	GO:0006950 response to stress
Lsqua194	GO:0006412 translation	GO:0015935 small ribosomal subunit	GO:0003735 structural constituent of ribosome | GO:0019843 rRNA binding
Lsqua196	GO:0006508 proteolysis		GO:0004190 aspartic-type endopeptidase activity
Lsqua197			GO:0003676 nucleic acid binding | GO:0046872 metal ion binding
Lsqua200	GO:0048268 clathrin coat assembly	GO:0005643 nuclear pore | GO:0030118 clathrin coat	GO:0005545 1-phosphatidylinositol binding | GO:0030276 clathrin binding
Lsqua201	GO:0006412 translation | GO:0006357 regulation of transcription from RNA polymerase II promoter	GO:0005840 ribosome | GO:0005634 nucleus	GO:0008270 zinc ion binding | GO:0000981 sequence-specific DNA binding RNA polymerase II transcription factor activity | GO:0003735 structural constituent of ribosome
Lsqua202		GO:0016021 integral to membrane
Lsqua203			GO:0019904 protein domain specific binding
Lsqua207	GO:0006355 regulation of transcription, DNA-dependent		GO:0003700 sequence-specific DNA binding transcription factor activity | GO:0043565 sequence-specific DNA binding
Lsqua208	GO:0006355 regulation of transcription, DNA-dependent		GO:0003700 sequence-specific DNA binding transcription factor activity | GO:0043565 sequence-specific DNA binding
Lsqua211			GO:0003676 nucleic acid binding | GO:0000166 nucleotide binding
Lsqua212	GO:0055114 oxidation-reduction process		GO:0051287 NAD binding | GO:0016616 oxidoreductase activity, acting on the CH-OH group of donors, NAD or NADP as acceptor
Lsqua213	GO:0071042 nuclear polyadenylation-dependent mRNA catabolic process | GO:0071051 polyadenylation-dependent snoRNA 3'-end processing | GO:0071038 nuclear polyadenylation-dependent tRNA catabolic process | GO:0043629 ncRNA polyadenylation | GO:0034475 U4 snRNA 3'-end processing | GO:0071035 nuclear polyadenylation-dependent rRNA catabolic process | GO:0071049 nuclear retention of pre-mRNA with aber…	GO:0005730 nucleolus | GO:0031499 TRAMP complex	GO:0034459 ATP-dependent 3'-5' RNA helicase activity | GO:0008143 poly(A) RNA binding | GO:0005524 ATP binding
Lsqua214			GO:0008270 zinc ion binding | GO:0003676 nucleic acid binding
Lsqua217	GO:0006468 protein phosphorylation		GO:0005524 ATP binding | GO:0004674 protein serine/threonine kinase activity
Lsqua218	GO:0006468 protein phosphorylation		GO:0005524 ATP binding | GO:0004674 protein serine/threonine kinase activity
Lsqua220	GO:0006750 glutathione biosynthetic process		GO:0004357 glutamate-cysteine ligase activity
Lsqua222	GO:0016311 dephosphorylation | GO:0000105 histidine biosynthetic process		GO:0004401 histidinol-phosphatase activity
Lsqua223	GO:0006096 glycolysis	GO:0000015 phosphopyruvate hydratase complex	GO:0004634 phosphopyruvate hydratase activity | GO:0000287 magnesium ion binding
Lsqua226	GO:0006355 regulation of transcription, DNA-dependent		GO:0003700 sequence-specific DNA binding transcription factor activity | GO:0043565 sequence-specific DNA binding
Lsqua227	GO:0035434 copper ion transmembrane transport | GO:0055114 oxidation-reduction process	GO:0016021 integral to membrane	GO:0016616 oxidoreductase activity, acting on the CH-OH group of donors, NAD or NADP as acceptor | GO:0048037 cofactor binding | GO:0008270 zinc ion binding | GO:0005375 copper ion transmembrane transporter activity
Lsqua228	GO:0045116 protein neddylation		GO:0019788 NEDD8 ligase activity
Lsqua230	GO:0006200 ATP catabolic process		GO:0003676 nucleic acid binding | GO:0008026 ATP-dependent helicase activity | GO:0005524 ATP binding
Lsqua232			GO:0035091 phosphatidylinositol binding
Lsqua233		GO:0016021 integral to membrane
Lsqua235	GO:0008152 metabolic process		GO:0017111 nucleoside-triphosphatase activity | GO:0005524 ATP binding
Lsqua236	GO:0008152 metabolic process		GO:0017111 nucleoside-triphosphatase activity | GO:0005524 ATP binding
Lsqua237	GO:0006481 C-terminal protein methylation | GO:0007264 small GTPase mediated signal transduction | GO:0015031 protein transport	GO:0016021 integral to membrane | GO:0005783 endoplasmic reticulum	GO:0004671 protein C-terminal S-isoprenylcysteine carboxyl O-methyltransferase activity | GO:0016787 hydrolase activity | GO:0005525 GTP binding
Lsqua239	GO:0006006 glucose metabolic process | GO:0055114 oxidation-reduction process		GO:0051287 NAD binding | GO:0004365 glyceraldehyde-3-phosphate dehydrogenase (NAD+) (phosphorylating) activity | GO:0008270 zinc ion binding | GO:0050661 NADP binding
Lsqua240	GO:0006457 protein folding | GO:0000413 protein peptidyl-prolyl isomerization		GO:0003755 peptidyl-prolyl cis-trans isomerase activity
Lsqua241	GO:0006075 (1->3)-beta-D-glucan biosynthetic process | GO:0003333 amino acid transmembrane transport	GO:0000148 1,3-beta-D-glucan synthase complex	GO:0015171 amino acid transmembrane transporter activity | GO:0003843 1,3-beta-D-glucan synthase activity
Lsqua243	GO:0006099 tricarboxylic acid cycle		GO:0004591 oxoglutarate dehydrogenase (succinyl-transferring) activity | GO:0030976 thiamine pyrophosphate binding
Lsqua244	GO:0006629 lipid metabolic process		GO:0030729 acetoacetate-CoA ligase activity
Lsqua245	GO:0006629 lipid metabolic process		GO:0030729 acetoacetate-CoA ligase activity
Lsqua246	GO:0006457 protein folding | GO:0006950 response to stress		GO:0005524 ATP binding | GO:0051082 unfolded protein binding
Lsqua247			GO:0008270 zinc ion binding
Lsqua248	GO:0009204 deoxyribonucleoside triphosphate catabolic process | GO:0009117 nucleotide metabolic process	GO:0005737 cytoplasm | GO:0005634 nucleus	GO:0046872 metal ion binding | GO:0047429 nucleoside-triphosphate diphosphatase activity | GO:0000166 nucleotide binding
Lsqua250	GO:0005975 carbohydrate metabolic process		GO:0016810 hydrolase activity, acting on carbon-nitrogen (but not peptide) bonds
Lsqua252	GO:0006289 nucleotide-excision repair | GO:0006355 regulation of transcription, DNA-dependent	GO:0000439 core TFIIH complex
Lsqua253	GO:0006289 nucleotide-excision repair | GO:0055114 oxidation-reduction process | GO:0006355 regulation of transcription, DNA-dependent	GO:0016021 integral to membrane | GO:0000439 core TFIIH complex	GO:0016772 transferase activity, transferring phosphorus-containing groups | GO:0016491 oxidoreductase activity
Lsqua255	GO:0044211 CTP salvage | GO:0044206 UMP salvage | GO:0016310 phosphorylation		GO:0004849 uridine kinase activity | GO:0016773 phosphotransferase activity, alcohol group as acceptor | GO:0005524 ATP binding
Lsqua256	GO:0043581 mycelium development | GO:0038032 termination of G-protein coupled receptor signaling pathway		GO:0035091 phosphatidylinositol binding
Lsqua257	GO:0006006 glucose metabolic process | GO:0005991 trehalose metabolic process | GO:0009058 biosynthetic process | GO:0051156 glucose 6-phosphate metabolic process		GO:0033832 alpha,alpha-trehalose phosphorylase (configuration-retaining) activity
Lsqua258	GO:0055114 oxidation-reduction process	GO:0005789 endoplasmic reticulum membrane | GO:0016021 integral to membrane | GO:0005741 mitochondrial outer membrane	GO:0004128 cytochrome-b5 reductase activity
Lsqua261	GO:0008152 metabolic process		GO:0016787 hydrolase activity
Lsqua264	GO:0006066 alcohol metabolic process		GO:0004026 alcohol O-acetyltransferase activity
Lsqua266	GO:0035335 peptidyl-tyrosine dephosphorylation		GO:0004725 protein tyrosine phosphatase activity | GO:0008138 protein tyrosine/serine/threonine phosphatase activity
Lsqua268	GO:0055114 oxidation-reduction process		GO:0016491 oxidoreductase activity
Lsqua270	GO:0006457 protein folding | GO:0006950 response to stress | GO:0055114 oxidation-reduction process		GO:0005524 ATP binding | GO:0004601 peroxidase activity | GO:0051082 unfolded protein binding
Lsqua271	GO:0015031 protein transport | GO:0042147 retrograde transport, endosome to Golgi	GO:0030904 retromer complex
Lsqua272	GO:0006357 regulation of transcription from RNA polymerase II promoter	GO:0005634 nucleus	GO:0000982 RNA polymerase II core promoter proximal region sequence-specific DNA binding transcription factor activity | GO:0000978 RNA polymerase II core promoter proximal region sequence-specific DNA binding
Lsqua273	GO:0008152 metabolic process		GO:0016787 hydrolase activity
Lsqua274	GO:0008152 metabolic process		GO:0016787 hydrolase activity
Lsqua275	GO:0008152 metabolic process		GO:0016772 transferase activity, transferring phosphorus-containing groups
Lsqua276	GO:0055114 oxidation-reduction process	GO:0005747 mitochondrial respiratory chain complex I | GO:0009536 plastid	GO:0008137 NADH dehydrogenase (ubiquinone) activity
Lsqua277	GO:0008152 metabolic process		GO:0016787 hydrolase activity
Lsqua278	GO:0019752 carboxylic acid metabolic process | GO:0009267 cellular response to starvation | GO:0006665 sphingolipid metabolic process | GO:0019722 calcium-mediated signaling	GO:0097038 perinuclear endoplasmic reticulum | GO:0032541 cortical endoplasmic reticulum	GO:0016740 transferase activity | GO:0030170 pyridoxal phosphate binding | GO:0016831 carboxy-lyase activity
Lsqua279	GO:0006357 regulation of transcription from RNA polymerase II promoter	GO:0005634 nucleus	GO:0000981 sequence-specific DNA binding RNA polymerase II transcription factor activity | GO:0008270 zinc ion binding
Lsqua280	GO:0055114 oxidation-reduction process		GO:0016491 oxidoreductase activity
Lsqua281	GO:0006355 regulation of transcription, DNA-dependent		GO:0003700 sequence-specific DNA binding transcription factor activity
Lsqua282	GO:0046373 L-arabinose metabolic process		GO:0046556 alpha-N-arabinofuranosidase activity
Lsqua283	GO:0046373 L-arabinose metabolic process		GO:0046556 alpha-N-arabinofuranosidase activity
Lsqua286	GO:0042546 cell wall biogenesis
Lsqua287	GO:0055114 oxidation-reduction process		GO:0016491 oxidoreductase activity
Lsqua288	GO:0055114 oxidation-reduction process		GO:0016491 oxidoreductase activity
Lsqua289	GO:0055114 oxidation-reduction process		GO:0016491 oxidoreductase activity
Lsqua291	GO:0006098 pentose-phosphate shunt	GO:0005737 cytoplasm	GO:0004801 sedoheptulose-7-phosphate:D-glyceraldehyde-3-phosphate glyceronetransferase activity
Lsqua292			GO:0046983 protein dimerization activity
Lsqua293	GO:0006754 ATP biosynthetic process | GO:0006812 cation transport | GO:0006200 ATP catabolic process	GO:0009536 plastid | GO:0016021 integral to membrane	GO:0019829 cation-transporting ATPase activity | GO:0046872 metal ion binding | GO:0005524 ATP binding
Lsqua294	GO:0055114 oxidation-reduction process		GO:0016491 oxidoreductase activity
Lsqua295			GO:0008289 lipid binding
Lsqua299	GO:0005975 carbohydrate metabolic process		GO:0043169 cation binding | GO:0003824 catalytic activity
Lsqua300	GO:0006801 superoxide metabolic process | GO:0055114 oxidation-reduction process		GO:0046872 metal ion binding | GO:0004784 superoxide dismutase activity
Lsqua301	GO:0009097 isoleucine biosynthetic process | GO:0009099 valine biosynthetic process		GO:0046872 metal ion binding | GO:0004160 dihydroxy-acid dehydratase activity | GO:0051539 4 iron, 4 sulfur cluster binding
Lsqua302	GO:0006351 transcription, DNA-dependent		GO:0003899 DNA-directed RNA polymerase activity | GO:0003723 RNA binding
Lsqua305	GO:0000462 maturation of SSU-rRNA from tricistronic rRNA transcript (SSU-rRNA, 5.8S rRNA, LSU-rRNA) | GO:0007165 signal transduction | GO:0043066 negative regulation of apoptotic process | GO:0043487 regulation of RNA stability	GO:0005739 mitochondrion | GO:0005730 nucleolus | GO:0030529 ribonucleoprotein complex
Lsqua306	GO:0006508 proteolysis		GO:0008234 cysteine-type peptidase activity
Lsqua307	GO:0019538 protein metabolic process | GO:0006950 response to stress		GO:0005524 ATP binding | GO:0017111 nucleoside-triphosphatase activity
Lsqua309	GO:0006508 proteolysis		GO:0003676 nucleic acid binding | GO:0004190 aspartic-type endopeptidase activity | GO:0008270 zinc ion binding
Lsqua310			GO:0008270 zinc ion binding | GO:0003676 nucleic acid binding
Lsqua313	GO:0016560 protein import into peroxisome matrix, docking	GO:0005777 peroxisome | GO:0016021 integral to membrane
Lsqua315		GO:0005634 nucleus	GO:0003677 DNA binding | GO:0003682 chromatin binding
Lsqua316	GO:0006633 fatty acid biosynthetic process | GO:0006665 sphingolipid metabolic process | GO:0055114 oxidation-reduction process	GO:0016021 integral to membrane | GO:0005783 endoplasmic reticulum	GO:0016491 oxidoreductase activity | GO:0005506 iron ion binding | GO:0020037 heme binding
Lsqua317	GO:0070933 histone H4 deacetylation | GO:0006355 regulation of transcription, DNA-dependent | GO:0070932 histone H3 deacetylation	GO:0005634 nucleus	GO:0003723 RNA binding | GO:0032041 NAD-dependent histone deacetylase activity (H3-K14 specific) | GO:0000166 nucleotide binding | GO:0046970 NAD-dependent histone deacetylase activity (H4-K16 specific) | GO:0046969 NAD-dependent histone deacetylase activity (H3-K9 specific)
Lsqua318		GO:0016021 integral to membrane
Lsqua319		GO:0005758 mitochondrial intermembrane space
Lsqua320	GO:0045454 cell redox homeostasis | GO:0055114 oxidation-reduction process		GO:0050660 flavin adenine dinucleotide binding | GO:0004148 dihydrolipoyl dehydrogenase activity
Lsqua322	GO:0019388 galactose catabolic process | GO:0034599 cellular response to oxidative stress | GO:0042843 D-xylose catabolic process | GO:0019568 arabinose catabolic process | GO:0055114 oxidation-reduction process	GO:0005622 intracellular | GO:0005576 extracellular region	GO:0032866 D-xylose:NADP reductase activity | GO:0003729 mRNA binding | GO:0047935 glucose 1-dehydrogenase (NADP+) activity
Lsqua325	GO:0010411 xyloglucan metabolic process | GO:0009251 glucan catabolic process	GO:0005576 extracellular region	GO:0008810 cellulase activity | GO:0030248 cellulose binding | GO:0033946 xyloglucan-specific endo-beta-1,4-glucanase activity
Lsqua326	GO:0016075 rRNA catabolic process | GO:0006396 RNA processing		GO:0003723 RNA binding | GO:0004525 ribonuclease III activity
Lsqua328			GO:0003676 nucleic acid binding | GO:0000166 nucleotide binding
Lsqua333	GO:0016070 RNA metabolic process		GO:0003723 RNA binding | GO:0003677 DNA binding
Lsqua335	GO:0045332 phospholipid translocation | GO:0008152 metabolic process | GO:0006812 cation transport	GO:0016021 integral to membrane	GO:0019829 cation-transporting ATPase activity | GO:0005524 ATP binding | GO:0000287 magnesium ion binding | GO:0004012 phospholipid-translocating ATPase activity
Lsqua337	GO:0008152 metabolic process		GO:0017111 nucleoside-triphosphatase activity | GO:0005524 ATP binding
Lsqua338	GO:0005975 carbohydrate metabolic process		GO:0016787 hydrolase activity
Lsqua340	GO:0071028 nuclear mRNA surveillance | GO:0071039 nuclear polyadenylation-dependent CUT catabolic process | GO:0000467 exonucleolytic trimming to generate mature 3'-end of 5.8S rRNA from tricistronic rRNA transcript (SSU-rRNA, 5.8S rRNA, LSU-rRNA) | GO:0070651 nonfunctional rRNA decay | GO:0071038 nuclear polyadenylation-dependent tRNA catabolic process | GO:0071035 nuclear polyadenylation-depend…	GO:0000176 nuclear exosome (RNase complex) | GO:0000177 cytoplasmic exosome (RNase complex) | GO:0005730 nucleolus	GO:0004521 endoribonuclease activity | GO:0000049 tRNA binding | GO:0000175 3'-5'-exoribonuclease activity
Lsqua341		GO:0005840 ribosome
Lsqua342	GO:0008152 metabolic process		GO:0016884 carbon-nitrogen ligase activity, with glutamine as amido-N-donor
Lsqua343	GO:0008152 metabolic process		GO:0016798 hydrolase activity, acting on glycosyl bonds
Lsqua344	GO:0008152 metabolic process		GO:0016798 hydrolase activity, acting on glycosyl bonds
Lsqua345	GO:0006508 proteolysis		GO:0004252 serine-type endopeptidase activity
Lsqua347	GO:0009058 biosynthetic process		GO:0016740 transferase activity | GO:0030170 pyridoxal phosphate binding
Lsqua348			GO:0008270 zinc ion binding
Lsqua349	GO:0009097 isoleucine biosynthetic process | GO:0009099 valine biosynthetic process		GO:0050660 flavin adenine dinucleotide binding | GO:0030976 thiamine pyrophosphate binding | GO:0000287 magnesium ion binding | GO:0003984 acetolactate synthase activity
Lsqua352	GO:0055114 oxidation-reduction process		GO:0016747 transferase activity, transferring acyl groups other than amino-acyl groups | GO:0000166 nucleotide binding | GO:0008270 zinc ion binding | GO:0019166 trans-2-enoyl-CoA reductase (NADPH) activity
Lsqua353	GO:0006413 translational initiation | GO:0006508 proteolysis		GO:0004177 aminopeptidase activity | GO:0003743 translation initiation factor activity
Lsqua354	GO:0016559 peroxisome fission | GO:0001300 chronological cell aging | GO:0050911 detection of chemical stimulus involved in sensory perception of smell | GO:0007186 G-protein coupled receptor signaling pathway | GO:0000266 mitochondrial fission	GO:0016021 integral to membrane | GO:0005777 peroxisome | GO:0005741 mitochondrial outer membrane | GO:0005886 plasma membrane	GO:0004984 olfactory receptor activity | GO:0004930 G-protein coupled receptor activity
Lsqua356	GO:0006810 transport	GO:0016021 integral to membrane
Lsqua357	GO:0006508 proteolysis | GO:0006412 translation	GO:0005840 ribosome | GO:0016020 membrane	GO:0019905 syntaxin binding | GO:0004222 metalloendopeptidase activity | GO:0003735 structural constituent of ribosome
Lsqua358	GO:0009409 response to cold | GO:0006412 translation	GO:0005730 nucleolus | GO:0005886 plasma membrane | GO:0005774 vacuolar membrane | GO:0022625 cytosolic large ribosomal subunit | GO:0009507 chloroplast	GO:0003735 structural constituent of ribosome
Lsqua359	GO:0006355 regulation of transcription, DNA-dependent | GO:0007165 signal transduction		GO:0003700 sequence-specific DNA binding transcription factor activity | GO:0043565 sequence-specific DNA binding | GO:0004871 signal transducer activity | GO:0008270 zinc ion binding
Lsqua362	GO:0008152 metabolic process		GO:0016787 hydrolase activity
Lsqua363	GO:0051603 proteolysis involved in cellular protein catabolic process	GO:0005737 cytoplasm | GO:0005839 proteasome core complex | GO:0005634 nucleus	GO:0004298 threonine-type endopeptidase activity
Lsqua366	GO:0042273 ribosomal large subunit biogenesis | GO:0030036 actin cytoskeleton organization | GO:0016310 phosphorylation | GO:0006096 glycolysis | GO:0000055 ribosomal large subunit export from nucleus		GO:0004618 phosphoglycerate kinase activity | GO:0005524 ATP binding
Lsqua367	GO:0032007 negative regulation of TOR signaling cascade | GO:0043547 positive regulation of GTPase activity | GO:0051056 regulation of small GTPase mediated signal transduction	GO:0033596 TSC1-TSC2 complex | GO:0005634 nucleus	GO:0005096 GTPase activator activity
Lsqua368		GO:0005840 ribosome
Lsqua369	GO:0005975 carbohydrate metabolic process		GO:0004553 hydrolase activity, hydrolyzing O-glycosyl compounds
Lsqua370	GO:0006075 (1->3)-beta-D-glucan biosynthetic process	GO:0000148 1,3-beta-D-glucan synthase complex	GO:0003843 1,3-beta-D-glucan synthase activity
Lsqua371	GO:0006541 glutamine metabolic process | GO:0006751 glutathione catabolic process | GO:0006508 proteolysis	GO:0005737 cytoplasm	GO:0008242 omega peptidase activity | GO:0016740 transferase activity
Lsqua372	GO:0006541 glutamine metabolic process | GO:0006751 glutathione catabolic process		GO:0016740 transferase activity
Lsqua373	GO:0006541 glutamine metabolic process | GO:0006751 glutathione catabolic process		GO:0016740 transferase activity
Lsqua374	GO:0006165 nucleoside diphosphate phosphorylation | GO:0006228 UTP biosynthetic process | GO:0006183 GTP biosynthetic process | GO:0006241 CTP biosynthetic process	GO:0005829 cytosol | GO:0005758 mitochondrial intermembrane space	GO:0004550 nucleoside diphosphate kinase activity | GO:0005524 ATP binding
Lsqua376	GO:0006950 response to stress
Lsqua377	GO:0006950 response to stress
Lsqua378	GO:0006950 response to stress
Lsqua380	GO:0016236 macroautophagy | GO:0007264 small GTPase mediated signal transduction | GO:0006888 ER to Golgi vesicle-mediated transport | GO:0006893 Golgi to plasma membrane transport | GO:0046686 response to cadmium ion	GO:0005829 cytosol | GO:0009506 plasmodesma | GO:0005774 vacuolar membrane | GO:0005794 Golgi apparatus | GO:0005886 plasma membrane	GO:0005507 copper ion binding | GO:0005525 GTP binding
Lsqua381	GO:0006397 mRNA processing		GO:0003676 nucleic acid binding | GO:0000166 nucleotide binding
Lsqua384	GO:0005978 glycogen biosynthetic process	GO:0005739 mitochondrion	GO:0004373 glycogen (starch) synthase activity
Lsqua385	GO:0051603 proteolysis involved in cellular protein catabolic process	GO:0005737 cytoplasm | GO:0005839 proteasome core complex | GO:0005634 nucleus	GO:0004298 threonine-type endopeptidase activity
Lsqua386	GO:0043086 negative regulation of catalytic activity | GO:0006508 proteolysis		GO:0042802 identical protein binding | GO:0004252 serine-type endopeptidase activity
Lsqua387	GO:0043086 negative regulation of catalytic activity | GO:0006508 proteolysis		GO:0042802 identical protein binding | GO:0004252 serine-type endopeptidase activity
Lsqua388		GO:0005618 cell wall
Lsqua389			GO:0003676 nucleic acid binding | GO:0000166 nucleotide binding
Lsqua390		GO:0016021 integral to membrane
Lsqua392	GO:0015693 magnesium ion transport	GO:0016020 membrane	GO:0015095 magnesium ion transmembrane transporter activity
Lsqua393	GO:0003333 amino acid transmembrane transport	GO:0016021 integral to membrane	GO:0015171 amino acid transmembrane transporter activity
Lsqua394	GO:0006368 transcription elongation from RNA polymerase II promoter | GO:0016567 protein ubiquitination | GO:0030163 protein catabolic process	GO:0008023 transcription elongation factor complex	GO:0008270 zinc ion binding | GO:0004842 ubiquitin-protein ligase activity
Lsqua395	GO:0015031 protein transport	GO:0016020 membrane
Lsqua396		GO:0016021 integral to membrane	GO:0015299 solute:hydrogen antiporter activity
Lsqua397	GO:0000128 flocculation | GO:0008152 metabolic process	GO:0016459 myosin complex	GO:0003723 RNA binding | GO:0005524 ATP binding | GO:0003774 motor activity | GO:0008270 zinc ion binding
Lsqua398	GO:0006364 rRNA processing	GO:0005829 cytosol | GO:0030688 preribosome, small subunit precursor
Lsqua399	GO:0006464 protein modification process		GO:0016787 hydrolase activity | GO:0016874 ligase activity
Lsqua401	GO:0005975 carbohydrate metabolic process		GO:0016787 hydrolase activity | GO:0030246 carbohydrate binding
Lsqua402	GO:0005975 carbohydrate metabolic process		GO:0004553 hydrolase activity, hydrolyzing O-glycosyl compounds
Lsqua404	GO:0008152 metabolic process		GO:0008080 N-acetyltransferase activity
Lsqua405	GO:0030150 protein import into mitochondrial matrix | GO:0015991 ATP hydrolysis coupled proton transport	GO:0005744 mitochondrial inner membrane presequence translocase complex | GO:0033180 proton-transporting V-type ATPase, V1 domain	GO:0046961 proton-transporting ATPase activity, rotational mechanism
Lsqua406	GO:0045454 cell redox homeostasis | GO:0006662 glycerol ether metabolic process | GO:0055114 oxidation-reduction process	GO:0005783 endoplasmic reticulum	GO:0010181 FMN binding | GO:0016853 isomerase activity | GO:0015035 protein disulfide oxidoreductase activity
Lsqua407		GO:0016021 integral to membrane
Lsqua410	GO:0008152 metabolic process	GO:0016459 myosin complex | GO:0016021 integral to membrane	GO:0003677 DNA binding | GO:0020037 heme binding | GO:0005524 ATP binding | GO:0003774 motor activity | GO:0016758 transferase activity, transferring hexosyl groups
Lsqua411	GO:0005978 glycogen biosynthetic process	GO:0005739 mitochondrion	GO:0004373 glycogen (starch) synthase activity
Lsqua412	GO:0006415 translational termination | GO:0015991 ATP hydrolysis coupled proton transport | GO:0015986 ATP synthesis coupled proton transport | GO:0006200 ATP catabolic process	GO:0005754 mitochondrial proton-transporting ATP synthase, catalytic core	GO:0046933 hydrogen ion transporting ATP synthase activity, rotational mechanism | GO:0016149 translation release factor activity, codon specific | GO:0005524 ATP binding
Lsqua413	GO:0006355 regulation of transcription, DNA-dependent		GO:0003700 sequence-specific DNA binding transcription factor activity | GO:0008270 zinc ion binding
Lsqua415	GO:0008152 metabolic process		GO:0016746 transferase activity, transferring acyl groups
Lsqua417	GO:0055114 oxidation-reduction process		GO:0020037 heme binding | GO:0016705 oxidoreductase activity, acting on paired donors, with incorporation or reduction of molecular oxygen | GO:0004497 monooxygenase activity | GO:0005506 iron ion binding
Lsqua418	GO:0009058 biosynthetic process		GO:0016740 transferase activity | GO:0030170 pyridoxal phosphate binding
Lsqua419	GO:0052051 interaction with host via protein secreted by type II secretion system | GO:0008152 metabolic process | GO:0043581 mycelium development		GO:0016787 hydrolase activity
Lsqua420	GO:0006508 proteolysis	GO:0005615 extracellular space	GO:0004222 metalloendopeptidase activity | GO:0008270 zinc ion binding
Lsqua421	GO:0045900 negative regulation of translational elongation | GO:0006614 SRP-dependent cotranslational protein targeting to membrane	GO:0048500 signal recognition particle	GO:0008312 7S RNA binding
Lsqua422			GO:0046872 metal ion binding
Lsqua423	GO:0006334 nucleosome assembly	GO:0000786 nucleosome | GO:0005634 nucleus	GO:0003677 DNA binding | GO:0046982 protein heterodimerization activity
Lsqua426	GO:0007155 cell adhesion	GO:0005618 cell wall	GO:0003677 DNA binding
Lsqua427	GO:0006200 ATP catabolic process		GO:0003676 nucleic acid binding | GO:0008026 ATP-dependent helicase activity | GO:0005524 ATP binding
Lsqua428	GO:0006200 ATP catabolic process		GO:0003676 nucleic acid binding | GO:0008026 ATP-dependent helicase activity | GO:0005524 ATP binding
Lsqua429	GO:0071577 zinc ion transmembrane transport	GO:0016021 integral to membrane	GO:0005385 zinc ion transmembrane transporter activity
Lsqua430	GO:0016311 dephosphorylation		GO:0046872 metal ion binding | GO:0003993 acid phosphatase activity | GO:0005524 ATP binding
Lsqua431	GO:0009231 riboflavin biosynthetic process		GO:0003935 GTP cyclohydrolase II activity
Lsqua432	GO:0055085 transmembrane transport | GO:0008643 carbohydrate transport	GO:0016021 integral to membrane	GO:0022891 substrate-specific transmembrane transporter activity
Lsqua433	GO:0015986 ATP synthesis coupled proton transport		GO:0005524 ATP binding | GO:0046933 hydrogen ion transporting ATP synthase activity, rotational mechanism
Lsqua434	GO:0006486 protein glycosylation	GO:0005794 Golgi apparatus | GO:0016021 integral to membrane	GO:0008378 galactosyltransferase activity
Lsqua435	GO:0006412 translation	GO:0005840 ribosome	GO:0003735 structural constituent of ribosome
Lsqua436	GO:0043581 mycelium development | GO:0034220 ion transmembrane transport | GO:0006813 potassium ion transport	GO:0016021 integral to membrane	GO:0042802 identical protein binding | GO:0005216 ion channel activity
Lsqua438	GO:0006508 proteolysis		GO:0004190 aspartic-type endopeptidase activity
Lsqua441	GO:0043581 mycelium development | GO:0055085 transmembrane transport	GO:0016021 integral to membrane
Lsqua444	GO:0006200 ATP catabolic process | GO:0009073 aromatic amino acid family biosynthetic process	GO:0016020 membrane	GO:0003849 3-deoxy-7-phosphoheptulonate synthase activity | GO:0005524 ATP binding | GO:0016887 ATPase activity
Lsqua445	GO:0006915 apoptotic process	GO:0005761 mitochondrial ribosome | GO:0015935 small ribosomal subunit
Lsqua446	GO:0055085 transmembrane transport | GO:0006200 ATP catabolic process	GO:0016021 integral to membrane	GO:0042626 ATPase activity, coupled to transmembrane movement of substances | GO:0005524 ATP binding
Lsqua448	GO:0008152 metabolic process		GO:0017111 nucleoside-triphosphatase activity | GO:0005524 ATP binding | GO:0003677 DNA binding
Lsqua451	GO:0008152 metabolic process		GO:0005524 ATP binding | GO:0016787 hydrolase activity
Lsqua452	GO:0033014 tetrapyrrole biosynthetic process | GO:0018160 peptidyl-pyrromethane cofactor linkage		GO:0004418 hydroxymethylbilane synthase activity
Lsqua453			GO:0004523 ribonuclease H activity | GO:0003723 RNA binding
Lsqua455	GO:0055085 transmembrane transport	GO:0016021 integral to membrane	GO:0022857 transmembrane transporter activity
Lsqua457	GO:0006261 DNA-dependent DNA replication | GO:0006508 proteolysis		GO:0003887 DNA-directed DNA polymerase activity | GO:0008484 sulfuric ester hydrolase activity | GO:0003677 DNA binding | GO:0004197 cysteine-type endopeptidase activity
Lsqua458	GO:0055114 oxidation-reduction process		GO:0051287 NAD binding | GO:0051539 4 iron, 4 sulfur cluster binding | GO:0008137 NADH dehydrogenase (ubiquinone) activity | GO:0010181 FMN binding
Lsqua459	GO:0006508 proteolysis		GO:0004252 serine-type endopeptidase activity
Lsqua462	GO:0015671 oxygen transport		GO:0020037 heme binding | GO:0005506 iron ion binding | GO:0019825 oxygen binding
Lsqua463	GO:0055114 oxidation-reduction process	GO:0005829 cytosol	GO:0051287 NAD binding | GO:0016616 oxidoreductase activity, acting on the CH-OH group of donors, NAD or NADP as acceptor
Lsqua464	GO:0006904 vesicle docking involved in exocytosis
Lsqua465	GO:0009052 pentose-phosphate shunt, non-oxidative branch		GO:0004751 ribose-5-phosphate isomerase activity
Lsqua469	GO:0006200 ATP catabolic process		GO:0003676 nucleic acid binding | GO:0008026 ATP-dependent helicase activity | GO:0005524 ATP binding
Lsqua470	GO:0016310 phosphorylation		GO:0016301 kinase activity
Lsqua471	GO:0006468 protein phosphorylation		GO:0005524 ATP binding | GO:0004674 protein serine/threonine kinase activity
Lsqua472	GO:0019752 carboxylic acid metabolic process		GO:0004451 isocitrate lyase activity | GO:0016881 acid-amino acid ligase activity
Lsqua473	GO:0055114 oxidation-reduction process	GO:0005789 endoplasmic reticulum membrane	GO:0003958 NADPH-hemoprotein reductase activity | GO:0005506 iron ion binding | GO:0010181 FMN binding
Lsqua474	GO:0055085 transmembrane transport	GO:0016021 integral to membrane	GO:0022857 transmembrane transporter activity
Lsqua475	GO:0055085 transmembrane transport	GO:0016021 integral to membrane	GO:0022857 transmembrane transporter activity
Lsqua476	GO:0006094 gluconeogenesis | GO:0016310 phosphorylation		GO:0016301 kinase activity | GO:0004612 phosphoenolpyruvate carboxykinase (ATP) activity | GO:0005524 ATP binding
Lsqua478	GO:0048208 COPII vesicle coating	GO:0000139 Golgi membrane
Lsqua479	GO:0005975 carbohydrate metabolic process	GO:0005576 extracellular region	GO:0030246 carbohydrate binding | GO:0004553 hydrolase activity, hydrolyzing O-glycosyl compounds
Lsqua480	GO:0005975 carbohydrate metabolic process | GO:0006508 proteolysis	GO:0005576 extracellular region	GO:0004553 hydrolase activity, hydrolyzing O-glycosyl compounds | GO:0030246 carbohydrate binding | GO:0004252 serine-type endopeptidase activity
Lsqua481	GO:0042122 alginic acid catabolic process	GO:0042597 periplasmic space	GO:0045135 poly(beta-D-mannuronate) lyase activity
Lsqua482	GO:0006378 mRNA polyadenylation	GO:0005849 mRNA cleavage factor complex	GO:0003729 mRNA binding
Lsqua483	GO:0006633 fatty acid biosynthetic process | GO:0055114 oxidation-reduction process	GO:0016021 integral to membrane	GO:0016491 oxidoreductase activity | GO:0005506 iron ion binding
Lsqua484	GO:0000079 regulation of cyclin-dependent protein kinase activity		GO:0016301 kinase activity | GO:0019901 protein kinase binding
Lsqua485			GO:0008270 zinc ion binding
Lsqua489	GO:0016192 vesicle-mediated transport | GO:0006886 intracellular protein transport	GO:0030131 clathrin adaptor complex	GO:0008565 protein transporter activity
Lsqua492	GO:0044237 cellular metabolic process		GO:0050662 coenzyme binding | GO:0003824 catalytic activity
Lsqua493	GO:0008152 metabolic process		GO:0016881 acid-amino acid ligase activity
Lsqua494	GO:0055114 oxidation-reduction process | GO:0006066 alcohol metabolic process		GO:0050660 flavin adenine dinucleotide binding | GO:0008812 choline dehydrogenase activity
Lsqua496	GO:0007049 cell cycle | GO:0000921 septin ring assembly | GO:0051301 cell division | GO:0031107 septin ring disassembly	GO:0005628 prospore membrane | GO:0005619 ascospore wall | GO:0032160 septin filament array | GO:0001400 mating projection base | GO:0031105 septin complex | GO:0000144 cellular bud neck septin ring	GO:0005545 1-phosphatidylinositol binding | GO:0005198 structural molecule activity | GO:0005525 GTP binding
Lsqua497	GO:0005975 carbohydrate metabolic process	GO:0005576 extracellular region	GO:0030246 carbohydrate binding | GO:0004553 hydrolase activity, hydrolyzing O-glycosyl compounds
Lsqua498	GO:0006364 rRNA processing	GO:0030688 preribosome, small subunit precursor
Lsqua499	GO:0055085 transmembrane transport | GO:0006839 mitochondrial transport	GO:0016021 integral to membrane | GO:0031966 mitochondrial membrane
Lsqua502	GO:0034194 D-galactonate catabolic process | GO:0009063 cellular amino acid catabolic process		GO:0008869 galactonate dehydratase activity | GO:0000287 magnesium ion binding
Lsqua503	GO:0008152 metabolic process		GO:0016787 hydrolase activity
Lsqua505	GO:0006511 ubiquitin-dependent protein catabolic process
Lsqua506	GO:0043087 regulation of GTPase activity | GO:0051301 cell division | GO:0051056 regulation of small GTPase mediated signal transduction	GO:0005622 intracellular	GO:0005085 guanyl-nucleotide exchange factor activity | GO:0003824 catalytic activity
Lsqua507	GO:0043087 regulation of GTPase activity | GO:0051301 cell division | GO:0051056 regulation of small GTPase mediated signal transduction	GO:0005622 intracellular	GO:0005085 guanyl-nucleotide exchange factor activity | GO:0003824 catalytic activity
Lsqua508	GO:0016567 protein ubiquitination	GO:0000151 ubiquitin ligase complex	GO:0004842 ubiquitin-protein ligase activity
Lsqua509	GO:0007507 heart development	GO:0019013 viral nucleocapsid | GO:0030529 ribonucleoprotein complex
Lsqua510	GO:0006184 GTP catabolic process		GO:0003924 GTPase activity | GO:0005525 GTP binding
Lsqua511	GO:0007049 cell cycle	GO:0031105 septin complex	GO:0005525 GTP binding
Lsqua512	GO:0006508 proteolysis	GO:0005759 mitochondrial matrix	GO:0046872 metal ion binding | GO:0004222 metalloendopeptidase activity
Lsqua516	GO:0006508 proteolysis		GO:0046872 metal ion binding | GO:0004222 metalloendopeptidase activity
Lsqua519	GO:0018108 peptidyl-tyrosine phosphorylation		GO:0004713 protein tyrosine kinase activity | GO:0005524 ATP binding
Lsqua520	GO:0046856 phosphatidylinositol dephosphorylation
Lsqua521	GO:0055114 oxidation-reduction process	GO:0016021 integral to membrane	GO:0016491 oxidoreductase activity
Lsqua522	GO:0055114 oxidation-reduction process | GO:0009423 chorismate biosynthetic process | GO:0016310 phosphorylation | GO:0009073 aromatic amino acid family biosynthetic process	GO:0005737 cytoplasm	GO:0003855 3-dehydroquinate dehydratase activity | GO:0004765 shikimate kinase activity | GO:0003866 3-phosphoshikimate 1-carboxyvinyltransferase activity | GO:0046872 metal ion binding | GO:0005524 ATP binding | GO:0004764 shikimate 3-dehydrogenase (NADP+) activity | GO:0003856 3-dehydroquinate synthase activity
Lsqua523	GO:0006468 protein phosphorylation | GO:0000910 cytokinesis | GO:0000902 cell morphogenesis | GO:0009749 response to glucose stimulus | GO:0006897 endocytosis	GO:0005937 mating projection | GO:0005935 cellular bud neck | GO:0000329 fungal-type vacuole membrane | GO:0005739 mitochondrion | GO:0005783 endoplasmic reticulum	GO:0004674 protein serine/threonine kinase activity | GO:0005524 ATP binding
Lsqua525	GO:0006950 response to stress
Lsqua526	GO:0005975 carbohydrate metabolic process		GO:0016787 hydrolase activity
Lsqua528	GO:0006511 ubiquitin-dependent protein catabolic process		GO:0008234 cysteine-type peptidase activity
Lsqua530	GO:0006508 proteolysis | GO:0006396 RNA processing		GO:0046872 metal ion binding | GO:0004222 metalloendopeptidase activity | GO:0003723 RNA binding | GO:0004525 ribonuclease III activity
Lsqua531	GO:0006357 regulation of transcription from RNA polymerase II promoter	GO:0005634 nucleus	GO:0008270 zinc ion binding | GO:0000981 sequence-specific DNA binding RNA polymerase II transcription factor activity | GO:0003677 DNA binding
Lsqua532	GO:0006457 protein folding | GO:0009408 response to heat		GO:0046872 metal ion binding | GO:0031072 heat shock protein binding | GO:0005524 ATP binding | GO:0051082 unfolded protein binding
Lsqua536	GO:0044208 'de novo' AMP biosynthetic process	GO:0009507 chloroplast	GO:0004019 adenylosuccinate synthase activity | GO:0000287 magnesium ion binding | GO:0005525 GTP binding
Lsqua537	GO:0006414 translational elongation	GO:0005853 eukaryotic translation elongation factor 1 complex	GO:0003746 translation elongation factor activity
Lsqua539	GO:0046654 tetrahydrofolate biosynthetic process	GO:0005737 cytoplasm	GO:0003934 GTP cyclohydrolase I activity
Lsqua541	GO:0006835 dicarboxylic acid transport | GO:0055085 transmembrane transport	GO:0016021 integral to membrane	GO:0017153 sodium:dicarboxylate symporter activity
Lsqua542	GO:0055085 transmembrane transport	GO:0016021 integral to membrane	GO:0005215 transporter activity
Lsqua544	GO:0006396 RNA processing	GO:0005840 ribosome	GO:0003723 RNA binding | GO:0004525 ribonuclease III activity
Lsqua547	GO:0006950 response to stress		GO:0005524 ATP binding
Lsqua548	GO:0005975 carbohydrate metabolic process		GO:0004553 hydrolase activity, hydrolyzing O-glycosyl compounds
Lsqua549	GO:0006412 translation	GO:0005840 ribosome	GO:0003735 structural constituent of ribosome
Lsqua550	GO:0006412 translation	GO:0015934 large ribosomal subunit	GO:0003735 structural constituent of ribosome | GO:0003723 RNA binding | GO:0016740 transferase activity
Lsqua551	GO:0006355 regulation of transcription, DNA-dependent	GO:0005634 nucleus	GO:0046872 metal ion binding | GO:0003700 sequence-specific DNA binding transcription factor activity | GO:0003676 nucleic acid binding
Lsqua552		GO:0005634 nucleus	GO:0046872 metal ion binding | GO:0003676 nucleic acid binding
Lsqua553	GO:0055114 oxidation-reduction process		GO:0003842 1-pyrroline-5-carboxylate dehydrogenase activity | GO:0004029 aldehyde dehydrogenase (NAD) activity
Lsqua554	GO:0006412 translation	GO:0005840 ribosome	GO:0003735 structural constituent of ribosome
Lsqua555	GO:0006075 (1->3)-beta-D-glucan biosynthetic process | GO:0003333 amino acid transmembrane transport	GO:0000148 1,3-beta-D-glucan synthase complex	GO:0015171 amino acid transmembrane transporter activity | GO:0003843 1,3-beta-D-glucan synthase activity
Lsqua556	GO:0005975 carbohydrate metabolic process		GO:0030170 pyridoxal phosphate binding | GO:0008184 glycogen phosphorylase activity
Lsqua557	GO:0000398 nuclear mRNA splicing, via spliceosome	GO:0005681 spliceosomal complex
Lsqua558	GO:0005975 carbohydrate metabolic process | GO:0006629 lipid metabolic process	GO:0005576 extracellular region	GO:0016788 hydrolase activity, acting on ester bonds | GO:0004553 hydrolase activity, hydrolyzing O-glycosyl compounds | GO:0030248 cellulose binding
Lsqua559	GO:0008152 metabolic process	GO:0005840 ribosome	GO:0016787 hydrolase activity
Lsqua563			GO:0003676 nucleic acid binding
Lsqua565			GO:0008270 zinc ion binding
Lsqua566	GO:0008152 metabolic process		GO:0046872 metal ion binding | GO:0005524 ATP binding | GO:0004419 hydroxymethylglutaryl-CoA lyase activity | GO:0004075 biotin carboxylase activity | GO:0016740 transferase activity
Lsqua567	GO:0008152 metabolic process		GO:0046872 metal ion binding | GO:0005524 ATP binding | GO:0004419 hydroxymethylglutaryl-CoA lyase activity | GO:0004075 biotin carboxylase activity | GO:0016740 transferase activity
Lsqua568	GO:0008152 metabolic process		GO:0046872 metal ion binding | GO:0005524 ATP binding | GO:0004419 hydroxymethylglutaryl-CoA lyase activity | GO:0004075 biotin carboxylase activity | GO:0016740 transferase activity
Lsqua569	GO:0055114 oxidation-reduction process		GO:0004316 3-oxoacyl-[acyl-carrier-protein] reductase (NADPH) activity
Lsqua570	GO:0008152 metabolic process		GO:0016810 hydrolase activity, acting on carbon-nitrogen (but not peptide) bonds
Lsqua571	GO:0006412 translation	GO:0005730 nucleolus | GO:0009506 plasmodesma | GO:0005618 cell wall | GO:0022627 cytosolic small ribosomal subunit | GO:0016020 membrane	GO:0003735 structural constituent of ribosome | GO:0003723 RNA binding
Lsqua573	GO:0006413 translational initiation		GO:0003743 translation initiation factor activity
Lsqua574	GO:0006457 protein folding | GO:0043066 negative regulation of apoptotic process | GO:0031247 actin rod assembly | GO:0001666 response to hypoxia | GO:0071318 cellular response to ATP | GO:0043666 regulation of phosphoprotein phosphatase activity | GO:0030433 ER-associated protein catabolic process	GO:0005788 endoplasmic reticulum lumen | GO:0005789 endoplasmic reticulum membrane | GO:0005829 cytosol | GO:0030496 midbody | GO:0048471 perinuclear region of cytoplasm | GO:0005886 plasma membrane	GO:0046790 virion binding | GO:0050750 low-density lipoprotein particle receptor binding | GO:0051082 unfolded protein binding | GO:0019903 protein phosphatase binding | GO:0003723 RNA binding | GO:0005524 ATP binding
Lsqua575		GO:0016021 integral to membrane	GO:0008271 secondary active sulfate transmembrane transporter activity
Lsqua578	GO:0000447 endonucleolytic cleavage in ITS1 to separate SSU-rRNA from 5.8S rRNA and LSU-rRNA from tricistronic rRNA transcript (SSU-rRNA, 5.8S rRNA, LSU-rRNA) | GO:0000480 endonucleolytic cleavage in 5'-ETS of tricistronic rRNA transcript (SSU-rRNA, 5.8S rRNA, LSU-rRNA) | GO:0000472 endonucleolytic cleavage to generate mature 5'-end of SSU-rRNA from (SSU-rRNA, 5.8S rRNA, LSU-rRNA)	GO:0005730 nucleolus | GO:0032040 small-subunit processome
Lsqua579	GO:0000447 endonucleolytic cleavage in ITS1 to separate SSU-rRNA from 5.8S rRNA and LSU-rRNA from tricistronic rRNA transcript (SSU-rRNA, 5.8S rRNA, LSU-rRNA) | GO:0000480 endonucleolytic cleavage in 5'-ETS of tricistronic rRNA transcript (SSU-rRNA, 5.8S rRNA, LSU-rRNA) | GO:0000472 endonucleolytic cleavage to generate mature 5'-end of SSU-rRNA from (SSU-rRNA, 5.8S rRNA, LSU-rRNA)	GO:0005730 nucleolus | GO:0032040 small-subunit processome
Lsqua580	GO:0006508 proteolysis		GO:0004252 serine-type endopeptidase activity
Lsqua581	GO:0019676 ammonia assimilation cycle | GO:0055114 oxidation-reduction process | GO:0006537 glutamate biosynthetic process	GO:0005739 mitochondrion	GO:0051536 iron-sulfur cluster binding | GO:0050660 flavin adenine dinucleotide binding | GO:0004355 glutamate synthase (NADPH) activity | GO:0010181 FMN binding | GO:0005506 iron ion binding | GO:0016040 glutamate synthase (NADH) activity
Lsqua582	GO:0008152 metabolic process		GO:0003824 catalytic activity
Lsqua583	GO:0006184 GTP catabolic process		GO:0003924 GTPase activity | GO:0005525 GTP binding
Lsqua584	GO:0006412 translation	GO:0005840 ribosome	GO:0003735 structural constituent of ribosome
Lsqua585	GO:0045010 actin nucleation	GO:0005884 actin filament	GO:0003779 actin binding | GO:0017048 Rho GTPase binding
Lsqua586	GO:0055114 oxidation-reduction process		GO:0046564 oxalate decarboxylase activity | GO:0050162 oxalate oxidase activity | GO:0045735 nutrient reservoir activity
Lsqua587	GO:0005975 carbohydrate metabolic process | GO:0055114 oxidation-reduction process		GO:0005507 copper ion binding | GO:0016491 oxidoreductase activity | GO:0016810 hydrolase activity, acting on carbon-nitrogen (but not peptide) bonds
Lsqua589	GO:0070596 (1->3)-alpha-glucan biosynthetic process | GO:0035690 cellular response to drug | GO:0006582 melanin metabolic process | GO:0044117 growth of symbiont in host | GO:0009847 spore germination	GO:0009277 fungal-type cell wall	GO:0043169 cation binding | GO:0016787 hydrolase activity | GO:0016740 transferase activity
Lsqua591	GO:0055114 oxidation-reduction process		GO:0016491 oxidoreductase activity | GO:0010181 FMN binding
Lsqua592	GO:0055114 oxidation-reduction process		GO:0016491 oxidoreductase activity | GO:0010181 FMN binding
Lsqua594	GO:0042823 pyridoxal phosphate biosynthetic process | GO:0055114 oxidation-reduction process | GO:0008615 pyridoxine biosynthetic process		GO:0004733 pyridoxamine-phosphate oxidase activity | GO:0010181 FMN binding
Lsqua595	GO:0006508 proteolysis		GO:0004190 aspartic-type endopeptidase activity
Lsqua596	GO:0008152 metabolic process		GO:0016787 hydrolase activity
Lsqua599	GO:0055114 oxidation-reduction process		GO:0016491 oxidoreductase activity
Lsqua600	GO:0055114 oxidation-reduction process		GO:0005507 copper ion binding | GO:0004322 ferroxidase activity
Lsqua601	GO:0006508 proteolysis		GO:0008237 metallopeptidase activity | GO:0016805 dipeptidase activity | GO:0034701 tripeptidase activity | GO:0004046 aminoacylase activity | GO:0004180 carboxypeptidase activity
Lsqua602	GO:0015991 ATP hydrolysis coupled proton transport	GO:0016021 integral to membrane | GO:0000221 vacuolar proton-transporting V-type ATPase, V1 domain	GO:0046961 proton-transporting ATPase activity, rotational mechanism
Lsqua607	GO:0031929 TOR signaling cascade	GO:0031931 TORC1 complex
Lsqua608		GO:0005856 cytoskeleton | GO:0005737 cytoplasm	GO:0005524 ATP binding
Lsqua609	GO:0007165 signal transduction | GO:0016310 phosphorylation		GO:0016301 kinase activity
Lsqua610	GO:0006486 protein glycosylation	GO:0016020 membrane	GO:0004576 oligosaccharyl transferase activity
Lsqua612	GO:0006007 glucose catabolic process	GO:0005737 cytoplasm	GO:0030145 manganese ion binding | GO:0004619 phosphoglycerate mutase activity | GO:0004082 bisphosphoglycerate mutase activity
Lsqua614		GO:0005634 nucleus
Lsqua618	GO:0008152 metabolic process	GO:0008250 oligosaccharyltransferase complex | GO:0016021 integral to membrane	GO:0004579 dolichyl-diphosphooligosaccharide-protein glycotransferase activity
Lsqua620		GO:0019013 viral nucleocapsid | GO:0030529 ribonucleoprotein complex
Lsqua621	GO:0007186 G-protein coupled receptor signaling pathway	GO:0005834 heterotrimeric G-protein complex	GO:0004871 signal transducer activity
Lsqua622	GO:0009966 regulation of signal transduction
Lsqua623	GO:0007264 small GTPase mediated signal transduction | GO:0032940 secretion by cell | GO:0008152 metabolic process | GO:0015031 protein transport	GO:0005739 mitochondrion | GO:0009506 plasmodesma | GO:0005768 endosome | GO:0005774 vacuolar membrane | GO:0005802 trans-Golgi network | GO:0005886 plasma membrane	GO:0004767 sphingomyelin phosphodiesterase activity | GO:0005525 GTP binding
Lsqua625	GO:0055085 transmembrane transport | GO:0044070 regulation of anion transport	GO:0005741 mitochondrial outer membrane	GO:0008308 voltage-gated anion channel activity
Lsqua629	GO:0035335 peptidyl-tyrosine dephosphorylation		GO:0004725 protein tyrosine phosphatase activity | GO:0003993 acid phosphatase activity
Lsqua631	GO:0015862 uridine transport	GO:0016020 membrane	GO:0005415 nucleoside:sodium symporter activity
Lsqua632	GO:0006772 thiamine metabolic process | GO:0016310 phosphorylation | GO:0009229 thiamine diphosphate biosynthetic process	GO:0005829 cytosol | GO:0009536 plastid	GO:0005524 ATP binding | GO:0004788 thiamine diphosphokinase activity | GO:0016301 kinase activity
Lsqua634	GO:0030042 actin filament depolymerization	GO:0015629 actin cytoskeleton	GO:0003676 nucleic acid binding | GO:0003779 actin binding | GO:0008270 zinc ion binding
Lsqua637	GO:0006446 regulation of translational initiation | GO:0001731 formation of translation preinitiation complex	GO:0005852 eukaryotic translation initiation factor 3 complex | GO:0016282 eukaryotic 43S preinitiation complex | GO:0033290 eukaryotic 48S preinitiation complex	GO:0003743 translation initiation factor activity
Lsqua639	GO:0032259 methylation		GO:0008168 methyltransferase activity
Lsqua640		GO:0005840 ribosome
Lsqua641	GO:0055085 transmembrane transport	GO:0016021 integral to membrane
Lsqua642	GO:0042026 protein refolding | GO:0006626 protein targeting to mitochondrion | GO:0006950 response to stress	GO:0005739 mitochondrion	GO:0005524 ATP binding | GO:0051082 unfolded protein binding
Lsqua643	GO:0006007 glucose catabolic process	GO:0005737 cytoplasm	GO:0030145 manganese ion binding | GO:0004619 phosphoglycerate mutase activity | GO:0004082 bisphosphoglycerate mutase activity
Lsqua645		GO:0016021 integral to membrane
Lsqua646	GO:0006505 GPI anchor metabolic process | GO:0006886 intracellular protein transport		GO:0004806 triglyceride lipase activity
Lsqua647	GO:0055114 oxidation-reduction process		GO:0050660 flavin adenine dinucleotide binding | GO:0003995 acyl-CoA dehydrogenase activity | GO:0043958 acryloyl-CoA reductase activity
Lsqua648	GO:0016311 dephosphorylation		GO:0003993 acid phosphatase activity | GO:0008707 4-phytase activity
Lsqua650	GO:0008206 bile acid metabolic process	GO:0005777 peroxisome | GO:0005739 mitochondrion	GO:0008111 alpha-methylacyl-CoA racemase activity | GO:0005102 receptor binding | GO:0016740 transferase activity
Lsqua651	GO:0006950 response to stress | GO:0042026 protein refolding	GO:0005737 cytoplasm	GO:0005524 ATP binding
Lsqua655	GO:0008152 metabolic process		GO:0017111 nucleoside-triphosphatase activity | GO:0005524 ATP binding
Lsqua656	GO:0006468 protein phosphorylation		GO:0005524 ATP binding | GO:0004674 protein serine/threonine kinase activity
Lsqua657	GO:0051301 cell division	GO:0016020 membrane
Lsqua658	GO:0008152 metabolic process		GO:0003824 catalytic activity
Lsqua659	GO:0008152 metabolic process	GO:0000502 proteasome complex	GO:0005524 ATP binding | GO:0017111 nucleoside-triphosphatase activity
Lsqua660	GO:0006413 translational initiation	GO:0016021 integral to membrane | GO:0016459 myosin complex	GO:0003743 translation initiation factor activity | GO:0016758 transferase activity, transferring hexosyl groups | GO:0003677 DNA binding | GO:0005524 ATP binding | GO:0003774 motor activity | GO:0020037 heme binding
Lsqua661	GO:0006810 transport	GO:0005737 cytoplasm | GO:0005874 microtubule
Lsqua662	GO:0006468 protein phosphorylation		GO:0005524 ATP binding | GO:0004674 protein serine/threonine kinase activity
Lsqua663	GO:0006413 translational initiation | GO:0040003 chitin-based cuticle development | GO:0006367 transcription initiation from RNA polymerase II promoter	GO:0031012 extracellular matrix	GO:0008010 structural constituent of chitin-based larval cuticle | GO:0046983 protein dimerization activity | GO:0003743 translation initiation factor activity | GO:0003824 catalytic activity
Lsqua664	GO:0008152 metabolic process		GO:0016787 hydrolase activity
Lsqua665	GO:0055085 transmembrane transport
Lsqua666	GO:0055114 oxidation-reduction process	GO:0016021 integral to membrane	GO:0016491 oxidoreductase activity
Lsqua667	GO:0008610 lipid biosynthetic process | GO:0032259 methylation		GO:0008168 methyltransferase activity
Lsqua668	GO:0016192 vesicle-mediated transport | GO:0006886 intracellular protein transport	GO:0016020 membrane	GO:0005484 SNAP receptor activity
Lsqua669	GO:0000921 septin ring assembly | GO:0006184 GTP catabolic process | GO:0007264 small GTPase mediated signal transduction | GO:0045860 positive regulation of protein kinase activity | GO:0030011 maintenance of cell polarity | GO:0007049 cell cycle	GO:0032160 septin filament array | GO:0000144 cellular bud neck septin ring | GO:0005937 mating projection | GO:0031105 septin complex	GO:0005525 GTP binding | GO:0005545 1-phosphatidylinositol binding | GO:0003924 GTPase activity | GO:0032947 protein complex scaffold
Lsqua670	GO:0006825 copper ion transport | GO:0006754 ATP biosynthetic process	GO:0016021 integral to membrane	GO:0046872 metal ion binding | GO:0043682 copper-transporting ATPase activity | GO:0005524 ATP binding
Lsqua672	GO:0008152 metabolic process		GO:0016758 transferase activity, transferring hexosyl groups
Lsqua673	GO:0008152 metabolic process		GO:0016758 transferase activity, transferring hexosyl groups
Lsqua676	GO:0007264 small GTPase mediated signal transduction | GO:0000079 regulation of cyclin-dependent protein kinase activity | GO:0006355 regulation of transcription, DNA-dependent | GO:0015031 protein transport		GO:0019901 protein kinase binding | GO:0005525 GTP binding
Lsqua677	GO:0006526 arginine biosynthetic process | GO:0006432 phenylalanyl-tRNA aminoacylation | GO:0008033 tRNA processing	GO:0005737 cytoplasm	GO:0005524 ATP binding | GO:0004826 phenylalanine-tRNA ligase activity | GO:0000287 magnesium ion binding | GO:0000049 tRNA binding | GO:0004055 argininosuccinate synthase activity
Lsqua680	GO:0009744 response to sucrose stimulus | GO:0009646 response to absence of light | GO:0043617 cellular response to sucrose starvation | GO:0055114 oxidation-reduction process		GO:0003863 3-methyl-2-oxobutanoate dehydrogenase (2-methylpropanoyl-transferring) activity
Lsqua684	GO:0006810 transport	GO:0005643 nuclear pore | GO:0005829 cytosol	GO:0017056 structural constituent of nuclear pore | GO:0046872 metal ion binding
Lsqua685	GO:0090201 negative regulation of release of cytochrome c from mitochondria | GO:0006508 proteolysis | GO:2001243 negative regulation of intrinsic apoptotic signaling pathway	GO:0016021 integral to membrane | GO:0005743 mitochondrial inner membrane	GO:0004252 serine-type endopeptidase activity
Lsqua687		GO:0009277 fungal-type cell wall	GO:0005199 structural constituent of cell wall
Lsqua690			GO:0003676 nucleic acid binding | GO:0046872 metal ion binding
Lsqua691	GO:0018108 peptidyl-tyrosine phosphorylation	GO:0016021 integral to membrane	GO:0004713 protein tyrosine kinase activity | GO:0005524 ATP binding
Lsqua692	GO:0015936 coenzyme A metabolic process | GO:0055114 oxidation-reduction process		GO:0050662 coenzyme binding | GO:0004420 hydroxymethylglutaryl-CoA reductase (NADPH) activity
Lsqua693	GO:0016567 protein ubiquitination | GO:0030163 protein catabolic process		GO:0004842 ubiquitin-protein ligase activity | GO:0008270 zinc ion binding
Lsqua694	GO:0055114 oxidation-reduction process		GO:0046564 oxalate decarboxylase activity | GO:0050162 oxalate oxidase activity | GO:0045735 nutrient reservoir activity
Lsqua695	GO:0006914 autophagy
Lsqua696	GO:0007034 vacuolar transport | GO:0015991 ATP hydrolysis coupled proton transport	GO:0000329 fungal-type vacuole membrane | GO:0033179 proton-transporting V-type ATPase, V0 domain	GO:0046961 proton-transporting ATPase activity, rotational mechanism
Lsqua698	GO:0006810 transport	GO:0016021 integral to membrane
Lsqua699			GO:0035091 phosphatidylinositol binding | GO:0005509 calcium ion binding
Lsqua700	GO:0030036 actin cytoskeleton organization	GO:0071203 WASH complex | GO:0008290 F-actin capping protein complex	GO:0003779 actin binding
Lsqua702	GO:0006355 regulation of transcription, DNA-dependent		GO:0003700 sequence-specific DNA binding transcription factor activity | GO:0043565 sequence-specific DNA binding
Lsqua703	GO:0008152 metabolic process	GO:0016021 integral to membrane	GO:0020037 heme binding | GO:0004100 chitin synthase activity
Lsqua705	GO:0008152 metabolic process		GO:0016772 transferase activity, transferring phosphorus-containing groups
Lsqua706	GO:0006886 intracellular protein transport	GO:0005741 mitochondrial outer membrane
Lsqua707	GO:0006468 protein phosphorylation		GO:0016787 hydrolase activity | GO:0005524 ATP binding | GO:0004674 protein serine/threonine kinase activity
Lsqua708	GO:0055114 oxidation-reduction process		GO:0051537 2 iron, 2 sulfur cluster binding | GO:0046872 metal ion binding | GO:0016491 oxidoreductase activity
Lsqua709	GO:0008152 metabolic process		GO:0016746 transferase activity, transferring acyl groups | GO:0016787 hydrolase activity
Lsqua711			GO:0003676 nucleic acid binding | GO:0000166 nucleotide binding
Lsqua712			GO:0008270 zinc ion binding
Lsqua713	GO:0022900 electron transport chain | GO:0006099 tricarboxylic acid cycle		GO:0050660 flavin adenine dinucleotide binding | GO:0016627 oxidoreductase activity, acting on the CH-CH group of donors
Lsqua714	GO:0022900 electron transport chain | GO:0006099 tricarboxylic acid cycle		GO:0050660 flavin adenine dinucleotide binding | GO:0016627 oxidoreductase activity, acting on the CH-CH group of donors
Lsqua715	GO:0022900 electron transport chain | GO:0006099 tricarboxylic acid cycle		GO:0050660 flavin adenine dinucleotide binding | GO:0016627 oxidoreductase activity, acting on the CH-CH group of donors
Lsqua716	GO:0006450 regulation of translational fidelity | GO:0006429 leucyl-tRNA aminoacylation	GO:0005737 cytoplasm	GO:0002161 aminoacyl-tRNA editing activity | GO:0004823 leucine-tRNA ligase activity | GO:0005524 ATP binding
Lsqua717	GO:0006412 translation	GO:0005840 ribosome	GO:0003735 structural constituent of ribosome
Lsqua718	GO:0030476 ascospore wall assembly | GO:0008361 regulation of cell size | GO:0003333 amino acid transmembrane transport | GO:0006075 (1->3)-beta-D-glucan biosynthetic process | GO:0045807 positive regulation of endocytosis	GO:0030479 actin cortical patch | GO:0005628 prospore membrane | GO:0000148 1,3-beta-D-glucan synthase complex | GO:0005739 mitochondrion	GO:0015171 amino acid transmembrane transporter activity | GO:0003843 1,3-beta-D-glucan synthase activity
Lsqua720	GO:0008152 metabolic process		GO:0003877 ATP adenylyltransferase activity
Lsqua721			GO:0046872 metal ion binding | GO:0003677 DNA binding
Lsqua722	GO:0008152 metabolic process		GO:0016740 transferase activity
Lsqua723	GO:0032259 methylation		GO:0008168 methyltransferase activity
Lsqua724	GO:0016567 protein ubiquitination		GO:0004842 ubiquitin-protein ligase activity
Lsqua725	GO:0006412 translation	GO:0005840 ribosome	GO:0003735 structural constituent of ribosome
Lsqua726	GO:0006355 regulation of transcription, DNA-dependent	GO:0005634 nucleus	GO:0016740 transferase activity
Lsqua730	GO:0008152 metabolic process		GO:0016787 hydrolase activity
Lsqua732	GO:0006278 RNA-dependent DNA replication | GO:0015074 DNA integration	GO:0005634 nucleus	GO:0003964 RNA-directed DNA polymerase activity | GO:0003723 RNA binding
Lsqua733	GO:0006412 translation	GO:0005840 ribosome	GO:0003735 structural constituent of ribosome
Lsqua735	GO:0006094 gluconeogenesis | GO:0016310 phosphorylation		GO:0016301 kinase activity | GO:0004612 phosphoenolpyruvate carboxykinase (ATP) activity | GO:0005524 ATP binding
Lsqua737	GO:0006355 regulation of transcription, DNA-dependent	GO:0005634 nucleus	GO:0008017 microtubule binding | GO:0003700 sequence-specific DNA binding transcription factor activity | GO:0043565 sequence-specific DNA binding
Lsqua739	GO:0090305 nucleic acid phosphodiester bond hydrolysis	GO:0005829 cytosol	GO:0004527 exonuclease activity
Lsqua741	GO:0008152 metabolic process		GO:0016787 hydrolase activity
Lsqua742		GO:0005739 mitochondrion	GO:0004129 cytochrome-c oxidase activity
Lsqua744	GO:0006508 proteolysis		GO:0004190 aspartic-type endopeptidase activity
Lsqua747	GO:0006081 cellular aldehyde metabolic process | GO:0055114 oxidation-reduction process		GO:0004030 aldehyde dehydrogenase [NAD(P)+] activity
Lsqua748	GO:0008152 metabolic process		GO:0004386 helicase activity | GO:0003677 DNA binding | GO:0005524 ATP binding | GO:0008270 zinc ion binding
Lsqua749			GO:0051087 chaperone binding
Lsqua750	GO:0008152 metabolic process		GO:0003824 catalytic activity
Lsqua752	GO:0010106 cellular response to iron ion starvation | GO:0055085 transmembrane transport | GO:0044117 growth of symbiont in host | GO:0009405 pathogenesis | GO:0006826 iron ion transport	GO:0009986 cell surface | GO:0016020 membrane	GO:0015093 ferrous iron transmembrane transporter activity
Lsqua753	GO:0035690 cellular response to drug | GO:0070417 cellular response to cold | GO:0071470 cellular response to osmotic stress		GO:0003676 nucleic acid binding | GO:0008270 zinc ion binding
Lsqua754	GO:0006508 proteolysis		GO:0004190 aspartic-type endopeptidase activity
Lsqua755	GO:0009107 lipoate biosynthetic process | GO:0009249 protein lipoylation	GO:0005739 mitochondrion	GO:0046872 metal ion binding | GO:0051539 4 iron, 4 sulfur cluster binding | GO:0016992 lipoate synthase activity
Lsqua760	GO:0008152 metabolic process		GO:0017111 nucleoside-triphosphatase activity | GO:0005524 ATP binding
Lsqua762			GO:0003676 nucleic acid binding
Lsqua763	GO:0007165 signal transduction	GO:0016021 integral to membrane	GO:0008158 hedgehog receptor activity
Lsqua764	GO:0008152 metabolic process		GO:0008080 N-acetyltransferase activity
Lsqua765	GO:0055114 oxidation-reduction process	GO:0016021 integral to membrane | GO:0070469 respiratory chain	GO:0009916 alternative oxidase activity | GO:0046872 metal ion binding
Lsqua766	GO:0006446 regulation of translational initiation | GO:0001731 formation of translation preinitiation complex	GO:0005852 eukaryotic translation initiation factor 3 complex | GO:0016282 eukaryotic 43S preinitiation complex | GO:0033290 eukaryotic 48S preinitiation complex	GO:0003743 translation initiation factor activity
Lsqua767	GO:0006446 regulation of translational initiation | GO:0001731 formation of translation preinitiation complex	GO:0005852 eukaryotic translation initiation factor 3 complex | GO:0016282 eukaryotic 43S preinitiation complex | GO:0033290 eukaryotic 48S preinitiation complex	GO:0003743 translation initiation factor activity
Lsqua768	GO:0032259 methylation		GO:0008168 methyltransferase activity
Lsqua770	GO:0006464 protein modification process | GO:0006508 proteolysis		GO:0008474 palmitoyl-(protein) hydrolase activity | GO:0008237 metallopeptidase activity | GO:0008270 zinc ion binding
Lsqua771	GO:0055114 oxidation-reduction process	GO:0016021 integral to membrane	GO:0000293 ferric-chelate reductase activity | GO:0016740 transferase activity
Lsqua774	GO:0006357 regulation of transcription from RNA polymerase II promoter	GO:0005634 nucleus	GO:0008270 zinc ion binding | GO:0000981 sequence-specific DNA binding RNA polymerase II transcription factor activity | GO:0003677 DNA binding
Lsqua780	GO:0009294 DNA mediated transformation | GO:0045003 double-strand break repair via synthesis-dependent strand annealing		GO:0004386 helicase activity | GO:0003677 DNA binding | GO:0051536 iron-sulfur cluster binding | GO:0005524 ATP binding | GO:0008270 zinc ion binding
Lsqua781	GO:0008152 metabolic process		GO:0004386 helicase activity | GO:0003677 DNA binding | GO:0051536 iron-sulfur cluster binding | GO:0005524 ATP binding | GO:0008270 zinc ion binding
Lsqua782	GO:0008152 metabolic process		GO:0004386 helicase activity | GO:0003677 DNA binding | GO:0051536 iron-sulfur cluster binding | GO:0005524 ATP binding | GO:0008270 zinc ion binding
Lsqua784	GO:0006096 glycolysis | GO:0046835 carbohydrate phosphorylation | GO:0006002 fructose 6-phosphate metabolic process	GO:0005945 6-phosphofructokinase complex	GO:0003872 6-phosphofructokinase activity | GO:0005524 ATP binding
Lsqua785	GO:0005975 carbohydrate metabolic process		GO:0004553 hydrolase activity, hydrolyzing O-glycosyl compounds
Lsqua787	GO:0006446 regulation of translational initiation | GO:0001731 formation of translation preinitiation complex	GO:0005852 eukaryotic translation initiation factor 3 complex | GO:0016282 eukaryotic 43S preinitiation complex | GO:0033290 eukaryotic 48S preinitiation complex	GO:0003743 translation initiation factor activity
Lsqua788	GO:0006281 DNA repair | GO:0042661 regulation of mesodermal cell fate specification | GO:0009953 dorsal/ventral pattern formation | GO:0006261 DNA-dependent DNA replication | GO:0060061 Spemann organizer formation		GO:0003887 DNA-directed DNA polymerase activity | GO:0003677 DNA binding
Lsqua789	GO:0006013 mannose metabolic process		GO:0030246 carbohydrate binding | GO:0004559 alpha-mannosidase activity | GO:0008270 zinc ion binding
Lsqua790			GO:0008270 zinc ion binding
Lsqua791	GO:0051301 cell division
Lsqua792	GO:0008152 metabolic process		GO:0016740 transferase activity
Lsqua793			GO:0003723 RNA binding
Lsqua797	GO:0070184 mitochondrial tyrosyl-tRNA aminoacylation	GO:0016021 integral to membrane | GO:0005759 mitochondrial matrix	GO:0005524 ATP binding | GO:0072545 tyrosine binding | GO:0000049 tRNA binding | GO:0042803 protein homodimerization activity | GO:0004831 tyrosine-tRNA ligase activity
Lsqua798	GO:0006468 protein phosphorylation		GO:0005524 ATP binding | GO:0004674 protein serine/threonine kinase activity
Lsqua799	GO:0042254 ribosome biogenesis	GO:0005840 ribosome
Lsqua800	GO:0009190 cyclic nucleotide biosynthetic process | GO:0018106 peptidyl-histidine phosphorylation | GO:0023014 signal transduction via phosphorylation event | GO:0018298 protein-chromophore linkage | GO:0009584 detection of visible light | GO:0006355 regulation of transcription, DNA-dependent | GO:0000160 two-component signal transduction system (phosphorelay) | GO:0006200 ATP catabolic process |…	GO:0016021 integral to membrane	GO:0008026 ATP-dependent helicase activity | GO:0000155 two-component sensor activity | GO:0003676 nucleic acid binding | GO:0009881 photoreceptor activity | GO:0000156 two-component response regulator activity | GO:0005524 ATP binding | GO:0016849 phosphorus-oxygen lyase activity
Lsqua801	GO:0006886 intracellular protein transport | GO:0071806 protein transmembrane transport	GO:0005886 plasma membrane | GO:0005744 mitochondrial inner membrane presequence translocase complex | GO:0016021 integral to membrane	GO:0015450 P-P-bond-hydrolysis-driven protein transmembrane transporter activity
Lsqua802	GO:0008053 mitochondrial fusion | GO:0006184 GTP catabolic process	GO:0016021 integral to membrane | GO:0005741 mitochondrial outer membrane	GO:0003924 GTPase activity | GO:0005525 GTP binding
Lsqua803	GO:0008053 mitochondrial fusion | GO:0006184 GTP catabolic process	GO:0016021 integral to membrane | GO:0005741 mitochondrial outer membrane	GO:0003924 GTPase activity | GO:0005525 GTP binding
Lsqua804	GO:0007229 integrin-mediated signaling pathway | GO:0006508 proteolysis		GO:0004222 metalloendopeptidase activity | GO:0008270 zinc ion binding
Lsqua805			GO:0003676 nucleic acid binding | GO:0000166 nucleotide binding
Lsqua811	GO:0008152 metabolic process		GO:0016740 transferase activity
Lsqua812	GO:0055129 L-proline biosynthetic process | GO:0030259 lipid glycosylation | GO:0055114 oxidation-reduction process		GO:0004735 pyrroline-5-carboxylate reductase activity | GO:0030246 carbohydrate binding | GO:0016758 transferase activity, transferring hexosyl groups
Lsqua813	GO:0042147 retrograde transport, endosome to Golgi | GO:0055114 oxidation-reduction process | GO:0045226 extracellular polysaccharide biosynthetic process | GO:0050790 regulation of catalytic activity | GO:0015031 protein transport	GO:0030904 retromer complex | GO:0005739 mitochondrion | GO:0048269 methionine adenosyltransferase complex | GO:0005634 nucleus	GO:0008831 dTDP-4-dehydrorhamnose reductase activity | GO:0032266 phosphatidylinositol-3-phosphate binding | GO:0019899 enzyme binding | GO:0043546 molybdopterin cofactor binding | GO:0016740 transferase activity | GO:0048270 methionine adenosyltransferase regulator activity
Lsqua814	GO:0000079 regulation of cyclin-dependent protein kinase activity		GO:0019901 protein kinase binding
Lsqua816	GO:0005975 carbohydrate metabolic process		GO:0016810 hydrolase activity, acting on carbon-nitrogen (but not peptide) bonds
Lsqua818	GO:0008152 metabolic process	GO:0005634 nucleus	GO:0016740 transferase activity
Lsqua821	GO:0005975 carbohydrate metabolic process		GO:0016787 hydrolase activity | GO:0043169 cation binding | GO:2001070 starch binding
Lsqua823	GO:0055085 transmembrane transport	GO:0016021 integral to membrane
Lsqua824	GO:0055085 transmembrane transport | GO:0044070 regulation of anion transport | GO:0008152 metabolic process	GO:0005741 mitochondrial outer membrane	GO:0070403 NAD+ binding | GO:0008080 N-acetyltransferase activity | GO:0008308 voltage-gated anion channel activity
Lsqua825	GO:0016311 dephosphorylation	GO:0005634 nucleus	GO:0004721 phosphoprotein phosphatase activity | GO:0016772 transferase activity, transferring phosphorus-containing groups
Lsqua826	GO:0016311 dephosphorylation	GO:0005634 nucleus	GO:0004721 phosphoprotein phosphatase activity | GO:0016772 transferase activity, transferring phosphorus-containing groups
Lsqua827	GO:0044237 cellular metabolic process | GO:0032259 methylation		GO:0003676 nucleic acid binding | GO:0050662 coenzyme binding | GO:0008168 methyltransferase activity
Lsqua828	GO:0006468 protein phosphorylation		GO:0005524 ATP binding | GO:0004674 protein serine/threonine kinase activity
Lsqua829	GO:0008152 metabolic process		GO:0003824 catalytic activity
Lsqua830	GO:0055085 transmembrane transport | GO:0006412 translation	GO:0005840 ribosome | GO:0016021 integral to membrane	GO:0003735 structural constituent of ribosome
Lsqua831	GO:0055085 transmembrane transport	GO:0016021 integral to membrane
Lsqua833	GO:0008152 metabolic process	GO:0019867 outer membrane	GO:0004386 helicase activity
Lsqua834			GO:0003677 DNA binding
Lsqua838			GO:0003676 nucleic acid binding | GO:0000166 nucleotide binding
Lsqua839	GO:0055085 transmembrane transport
Lsqua840	GO:0055114 oxidation-reduction process | GO:0019878 lysine biosynthetic process via aminoadipic acid		GO:0004043 L-aminoadipate-semialdehyde dehydrogenase activity | GO:0016740 transferase activity | GO:0031177 phosphopantetheine binding
Lsqua842	GO:0006468 protein phosphorylation		GO:0004672 protein kinase activity | GO:0005524 ATP binding
Lsqua843	GO:0006400 tRNA modification		GO:0008176 tRNA (guanine-N7-)-methyltransferase activity
Lsqua844	GO:0006413 translational initiation | GO:0055085 transmembrane transport	GO:0016021 integral to membrane	GO:0003743 translation initiation factor activity
Lsqua845	GO:0006413 translational initiation | GO:0055085 transmembrane transport	GO:0016021 integral to membrane	GO:0003743 translation initiation factor activity
Lsqua846	GO:0055085 transmembrane transport	GO:0016021 integral to membrane
Lsqua847	GO:0016311 dephosphorylation		GO:0016791 phosphatase activity
Lsqua848	GO:0055085 transmembrane transport | GO:0006200 ATP catabolic process	GO:0016021 integral to membrane	GO:0042626 ATPase activity, coupled to transmembrane movement of substances | GO:0005524 ATP binding
Lsqua849	GO:0055114 oxidation-reduction process		GO:0020037 heme binding | GO:0046872 metal ion binding | GO:0000104 succinate dehydrogenase activity
Lsqua850	GO:0016226 iron-sulfur cluster assembly | GO:0000244 assembly of spliceosomal tri-snRNP	GO:0019013 viral nucleocapsid | GO:0046540 U4/U6 x U5 tri-snRNP complex	GO:0051536 iron-sulfur cluster binding | GO:0005506 iron ion binding
Lsqua851	GO:0005975 carbohydrate metabolic process		GO:0004553 hydrolase activity, hydrolyzing O-glycosyl compounds
Lsqua852	GO:0015074 DNA integration		GO:0003676 nucleic acid binding | GO:0008270 zinc ion binding
Lsqua853	GO:0006468 protein phosphorylation	GO:0005737 cytoplasm	GO:0004672 protein kinase activity | GO:0005524 ATP binding
Lsqua854	GO:0006468 protein phosphorylation	GO:0005737 cytoplasm	GO:0004672 protein kinase activity | GO:0005524 ATP binding
Lsqua855	GO:0006468 protein phosphorylation	GO:0005737 cytoplasm	GO:0004672 protein kinase activity | GO:0005524 ATP binding
Lsqua856	GO:0006298 mismatch repair	GO:0032301 MutSalpha complex | GO:0032302 MutSbeta complex	GO:0005524 ATP binding | GO:0030983 mismatched DNA binding
Lsqua857	GO:0006200 ATP catabolic process		GO:0003676 nucleic acid binding | GO:0008026 ATP-dependent helicase activity | GO:0005524 ATP binding
Lsqua858			GO:0003677 DNA binding
Lsqua859	GO:0006468 protein phosphorylation | GO:0007218 neuropeptide signaling pathway	GO:0016020 membrane	GO:0004672 protein kinase activity | GO:0005524 ATP binding
Lsqua860	GO:0006810 transport	GO:0016021 integral to membrane
Lsqua861	GO:0045292 nuclear mRNA cis splicing, via spliceosome	GO:0005846 nuclear cap binding complex | GO:0000243 commitment complex	GO:0000339 RNA cap binding | GO:0000166 nucleotide binding
Lsqua862	GO:0006396 RNA processing	GO:0005634 nucleus
Lsqua863			GO:0008270 zinc ion binding | GO:0003677 DNA binding
Lsqua864	GO:0000168 activation of MAPKK activity involved in osmosensory signaling pathway | GO:0071470 cellular response to osmotic stress		GO:0004674 protein serine/threonine kinase activity | GO:0005524 ATP binding
Lsqua865	GO:0032259 methylation | GO:0070988 demethylation | GO:0055114 oxidation-reduction process		GO:0020037 heme binding | GO:0008398 sterol 14-demethylase activity | GO:0005506 iron ion binding | GO:0008168 methyltransferase activity
Lsqua875	GO:0055085 transmembrane transport	GO:0016021 integral to membrane
Lsqua876			GO:0004523 ribonuclease H activity | GO:0003723 RNA binding
Lsqua878	GO:0043087 regulation of GTPase activity | GO:0032012 regulation of ARF protein signal transduction		GO:0005086 ARF guanyl-nucleotide exchange factor activity
Lsqua879	GO:0008152 metabolic process		GO:0016740 transferase activity
Lsqua880	GO:0034599 cellular response to oxidative stress | GO:0009051 pentose-phosphate shunt, oxidative branch	GO:0005739 mitochondrion	GO:0004616 phosphogluconate dehydrogenase (decarboxylating) activity | GO:0050661 NADP binding
Lsqua881	GO:0046835 carbohydrate phosphorylation | GO:0042732 D-xylose metabolic process	GO:0005737 cytoplasm	GO:0004856 xylulokinase activity | GO:0005524 ATP binding
Lsqua882	GO:0006508 proteolysis		GO:0008234 cysteine-type peptidase activity
Lsqua883	GO:0055114 oxidation-reduction process | GO:0006812 cation transport | GO:0055085 transmembrane transport	GO:0016021 integral to membrane	GO:0016491 oxidoreductase activity | GO:0008324 cation transmembrane transporter activity
Lsqua885	GO:0009450 gamma-aminobutyric acid catabolic process | GO:0055114 oxidation-reduction process		GO:0009013 succinate-semialdehyde dehydrogenase [NAD(P)+] activity | GO:0047113 aldehyde dehydrogenase (pyrroloquinoline-quinone) activity
Lsqua886	GO:0006886 intracellular protein transport | GO:0006888 ER to Golgi vesicle-mediated transport	GO:0030127 COPII vesicle coat | GO:0019028 viral capsid	GO:0008270 zinc ion binding
Lsqua891	GO:0006357 regulation of transcription from RNA polymerase II promoter	GO:0005634 nucleus	GO:0008270 zinc ion binding | GO:0000981 sequence-specific DNA binding RNA polymerase II transcription factor activity | GO:0003677 DNA binding
Lsqua892	GO:0019318 hexose metabolic process		GO:0030246 carbohydrate binding | GO:0016853 isomerase activity
Lsqua893	GO:0042254 ribosome biogenesis | GO:0006414 translational elongation	GO:0005840 ribosome	GO:0003735 structural constituent of ribosome
Lsqua895	GO:0016192 vesicle-mediated transport | GO:0006886 intracellular protein transport		GO:0008270 zinc ion binding
Lsqua897	GO:0006189 'de novo' IMP biosynthetic process		GO:0004018 N6-(1,2-dicarboxyethyl)AMP AMP-lyase (fumarate-forming) activity
Lsqua898	GO:0009152 purine ribonucleotide biosynthetic process		GO:0004018 N6-(1,2-dicarboxyethyl)AMP AMP-lyase (fumarate-forming) activity | GO:0070626 (S)-2-(5-amino-1-(5-phospho-D-ribosyl)imidazole-4-carboxamido)succinate AMP-lyase (fumarate-forming) activity
Lsqua899	GO:0008152 metabolic process		GO:0016787 hydrolase activity
Lsqua900	GO:0006200 ATP catabolic process		GO:0003676 nucleic acid binding | GO:0008026 ATP-dependent helicase activity | GO:0005524 ATP binding
Lsqua901	GO:0008152 metabolic process		GO:0016787 hydrolase activity | GO:0046872 metal ion binding
Lsqua902	GO:0006744 ubiquinone biosynthetic process | GO:0055114 oxidation-reduction process		GO:0016709 oxidoreductase activity, acting on paired donors, with incorporation or reduction of molecular oxygen, NADH or NADPH as one donor, and incorporation of one atom of oxygen
Lsqua903		GO:0005840 ribosome
Lsqua904	GO:0008654 phospholipid biosynthetic process		GO:0016780 phosphotransferase activity, for other substituted phosphate groups
Lsqua905	GO:0006950 response to stress
Lsqua907	GO:0003333 amino acid transmembrane transport	GO:0016021 integral to membrane	GO:0015171 amino acid transmembrane transporter activity
Lsqua908	GO:0006487 protein N-linked glycosylation	GO:0008250 oligosaccharyltransferase complex | GO:0016021 integral to membrane	GO:0016740 transferase activity
Lsqua909	GO:0016311 dephosphorylation	GO:0019031 viral envelope	GO:0016791 phosphatase activity
Lsqua910	GO:0055085 transmembrane transport	GO:0016021 integral to membrane
Lsqua911	GO:0006468 protein phosphorylation		GO:0005524 ATP binding | GO:0004674 protein serine/threonine kinase activity
Lsqua913	GO:0006412 translation	GO:0005840 ribosome	GO:0003735 structural constituent of ribosome
Lsqua914	GO:0055085 transmembrane transport	GO:0016021 integral to membrane
Lsqua915	GO:0048193 Golgi vesicle transport	GO:0016020 membrane
Lsqua917	GO:0006412 translation	GO:0033009 nucleomorph | GO:0015935 small ribosomal subunit | GO:0005739 mitochondrion	GO:0003735 structural constituent of ribosome
Lsqua919	GO:0006355 regulation of transcription, DNA-dependent		GO:0003700 sequence-specific DNA binding transcription factor activity | GO:0043565 sequence-specific DNA binding
Lsqua920	GO:0006412 translation	GO:0005840 ribosome	GO:0003735 structural constituent of ribosome
Lsqua921	GO:0016310 phosphorylation		GO:0016301 kinase activity
Lsqua922			GO:0005509 calcium ion binding | GO:0005102 receptor binding
Lsqua923	GO:0006412 translation	GO:0005840 ribosome	GO:0003735 structural constituent of ribosome
Lsqua924	GO:0000162 tryptophan biosynthetic process		GO:0004048 anthranilate phosphoribosyltransferase activity
Lsqua926	GO:0055085 transmembrane transport	GO:0016021 integral to membrane
Lsqua927	GO:0030448 hyphal growth | GO:0007114 cell budding | GO:0000920 cytokinetic cell separation | GO:0009405 pathogenesis | GO:0050790 regulation of catalytic activity | GO:0007154 cell communication	GO:0005737 cytoplasm	GO:0035091 phosphatidylinositol binding | GO:0005094 Rho GDP-dissociation inhibitor activity
Lsqua928			GO:0008270 zinc ion binding | GO:0030554 adenyl nucleotide binding
Lsqua929	GO:0008152 metabolic process		GO:0016787 hydrolase activity
Lsqua930	GO:0046952 ketone body catabolic process	GO:0005739 mitochondrion	GO:0008260 3-oxoacid CoA-transferase activity
Lsqua931	GO:0006633 fatty acid biosynthetic process		GO:0004315 3-oxoacyl-[acyl-carrier-protein] synthase activity
Lsqua932	GO:0006591 ornithine metabolic process	GO:0005634 nucleus | GO:0005829 cytosol	GO:0030170 pyridoxal phosphate binding | GO:0004587 ornithine-oxo-acid transaminase activity
Lsqua933	GO:0008152 metabolic process		GO:0030170 pyridoxal phosphate binding | GO:0008483 transaminase activity
Lsqua934	GO:0090305 nucleic acid phosphodiester bond hydrolysis | GO:0006289 nucleotide-excision repair	GO:0005634 nucleus	GO:0004519 endonuclease activity | GO:0003697 single-stranded DNA binding
Lsqua935	GO:0055114 oxidation-reduction process		GO:0020037 heme binding | GO:0016705 oxidoreductase activity, acting on paired donors, with incorporation or reduction of molecular oxygen | GO:0004497 monooxygenase activity | GO:0005506 iron ion binding
Lsqua937	GO:0005975 carbohydrate metabolic process	GO:0005576 extracellular region	GO:0004553 hydrolase activity, hydrolyzing O-glycosyl compounds | GO:0030248 cellulose binding
Lsqua938	GO:0055114 oxidation-reduction process		GO:0005199 structural constituent of cell wall | GO:0016491 oxidoreductase activity
Lsqua939		GO:0032040 small-subunit processome
Lsqua940	GO:0055114 oxidation-reduction process		GO:0016491 oxidoreductase activity
Lsqua941	GO:0006364 rRNA processing	GO:0005730 nucleolus | GO:0030529 ribonucleoprotein complex
Lsqua944	GO:0008152 metabolic process		GO:0016787 hydrolase activity
Lsqua945	GO:0006508 proteolysis		GO:0004190 aspartic-type endopeptidase activity
Lsqua946	GO:0006508 proteolysis		GO:0004190 aspartic-type endopeptidase activity
Lsqua947			GO:0046872 metal ion binding
Lsqua949	GO:0016567 protein ubiquitination	GO:0016021 integral to membrane | GO:0005680 anaphase-promoting complex	GO:0004842 ubiquitin-protein ligase activity | GO:0008270 zinc ion binding
Lsqua950	GO:0006353 transcription termination, DNA-dependent | GO:0010050 vegetative phase change | GO:0010216 maintenance of DNA methylation | GO:0010599 production of lsiRNA involved in RNA interference | GO:0010267 production of ta-siRNAs involved in RNA interference | GO:0006200 ATP catabolic process | GO:0009616 virus induced gene silencing	GO:0009536 plastid | GO:0005634 nucleus	GO:0004525 ribonuclease III activity | GO:0008026 ATP-dependent helicase activity | GO:0046872 metal ion binding | GO:0003677 DNA binding | GO:0003723 RNA binding | GO:0005524 ATP binding
Lsqua951	GO:0006904 vesicle docking involved in exocytosis
Lsqua952	GO:0006184 GTP catabolic process | GO:0003333 amino acid transmembrane transport | GO:0006446 regulation of translational initiation	GO:0016020 membrane | GO:0022627 cytosolic small ribosomal subunit | GO:0005739 mitochondrion	GO:0005525 GTP binding | GO:0003743 translation initiation factor activity | GO:0043022 ribosome binding | GO:0015171 amino acid transmembrane transporter activity | GO:0003924 GTPase activity
Lsqua953	GO:0006355 regulation of transcription, DNA-dependent | GO:0006413 translational initiation | GO:0006352 transcription initiation, DNA-dependent		GO:0017025 TBP-class protein binding | GO:0003743 translation initiation factor activity | GO:0008270 zinc ion binding
Lsqua955	GO:0008152 metabolic process	GO:0005739 mitochondrion	GO:0016787 hydrolase activity
Lsqua956	GO:0048034 heme O biosynthetic process | GO:0055114 oxidation-reduction process	GO:0016021 integral to membrane	GO:0016491 oxidoreductase activity | GO:0008495 protoheme IX farnesyltransferase activity
Lsqua962		GO:0005856 cytoskeleton | GO:0005737 cytoplasm	GO:0005524 ATP binding
Lsqua963	GO:0006099 tricarboxylic acid cycle | GO:0006097 glyoxylate cycle	GO:0005777 peroxisome	GO:0004451 isocitrate lyase activity
Lsqua964	GO:0006788 heme oxidation		GO:0004392 heme oxygenase (decyclizing) activity
Lsqua965	GO:0006412 translation	GO:0005840 ribosome	GO:0003735 structural constituent of ribosome | GO:0019843 rRNA binding
Lsqua966	GO:0006414 translational elongation | GO:0006184 GTP catabolic process	GO:0005737 cytoplasm	GO:0003746 translation elongation factor activity | GO:0003924 GTPase activity | GO:0005525 GTP binding
Lsqua967	GO:0018342 protein prenylation		GO:0008318 protein prenyltransferase activity
Lsqua968	GO:0000160 two-component signal transduction system (phosphorelay) | GO:0035556 intracellular signal transduction | GO:0006355 regulation of transcription, DNA-dependent	GO:0005634 nucleus	GO:0000156 two-component response regulator activity | GO:0043565 sequence-specific DNA binding | GO:0003700 sequence-specific DNA binding transcription factor activity
Lsqua969	GO:0000160 two-component signal transduction system (phosphorelay) | GO:0035556 intracellular signal transduction | GO:0006355 regulation of transcription, DNA-dependent	GO:0005634 nucleus	GO:0000156 two-component response regulator activity | GO:0043565 sequence-specific DNA binding | GO:0003700 sequence-specific DNA binding transcription factor activity
Lsqua970	GO:0006094 gluconeogenesis | GO:0016310 phosphorylation		GO:0016301 kinase activity | GO:0004612 phosphoenolpyruvate carboxykinase (ATP) activity | GO:0005524 ATP binding
Lsqua971	GO:0006094 gluconeogenesis | GO:0016310 phosphorylation		GO:0016301 kinase activity | GO:0004612 phosphoenolpyruvate carboxykinase (ATP) activity | GO:0005524 ATP binding
Lsqua972	GO:0006744 ubiquinone biosynthetic process | GO:0055114 oxidation-reduction process		GO:0050660 flavin adenine dinucleotide binding | GO:0016709 oxidoreductase activity, acting on paired donors, with incorporation or reduction of molecular oxygen, NADH or NADPH as one donor, and incorporation of one atom of oxygen
Lsqua973	GO:0006412 translation	GO:0015935 small ribosomal subunit	GO:0003735 structural constituent of ribosome | GO:0003723 RNA binding
Lsqua974			GO:0046872 metal ion binding
Lsqua977	GO:0006351 transcription, DNA-dependent		GO:0003899 DNA-directed RNA polymerase activity | GO:0003677 DNA binding | GO:0032549 ribonucleoside binding
Lsqua978	GO:0006351 transcription, DNA-dependent		GO:0003899 DNA-directed RNA polymerase activity | GO:0003677 DNA binding | GO:0032549 ribonucleoside binding
Lsqua979	GO:0005975 carbohydrate metabolic process		GO:0016832 aldehyde-lyase activity | GO:0004802 transketolase activity
Lsqua980	GO:0016310 phosphorylation		GO:0016301 kinase activity
Lsqua982	GO:0055085 transmembrane transport	GO:0016021 integral to membrane
Lsqua984	GO:0055114 oxidation-reduction process		GO:0050660 flavin adenine dinucleotide binding | GO:0004499 flavin-containing monooxygenase activity | GO:0050661 NADP binding
Lsqua987	GO:0006633 fatty acid biosynthetic process | GO:0055114 oxidation-reduction process	GO:0016021 integral to membrane | GO:0005783 endoplasmic reticulum	GO:0004768 stearoyl-CoA 9-desaturase activity | GO:0005506 iron ion binding | GO:0020037 heme binding
Lsqua988	GO:0006310 DNA recombination | GO:0007165 signal transduction | GO:0051103 DNA ligation involved in DNA repair	GO:0016021 integral to membrane | GO:0016459 myosin complex	GO:0005509 calcium ion binding | GO:0003910 DNA ligase (ATP) activity | GO:0003677 DNA binding | GO:0005524 ATP binding | GO:0016740 transferase activity | GO:0003774 motor activity | GO:0008158 hedgehog receptor activity
Lsqua990	GO:0005975 carbohydrate metabolic process		GO:0004553 hydrolase activity, hydrolyzing O-glycosyl compounds
Lsqua993	GO:0055114 oxidation-reduction process | GO:0006066 alcohol metabolic process		GO:0050660 flavin adenine dinucleotide binding | GO:0008812 choline dehydrogenase activity
Lsqua994	GO:0048313 Golgi inheritance | GO:0007107 membrane addition at site of cytokinesis | GO:0000132 establishment of mitotic spindle orientation | GO:0007118 budding cell apical bud growth | GO:0009826 unidimensional cell growth | GO:0016192 vesicle-mediated transport | GO:0045033 peroxisome inheritance | GO:0000001 mitochondrion inheritance | GO:0008152 metabolic process | GO:0030050 vesicle transpo…	GO:0000329 fungal-type vacuole membrane | GO:0031941 filamentous actin | GO:0032432 actin filament bundle | GO:0031982 vesicle | GO:0043332 mating projection tip | GO:0005935 cellular bud neck | GO:0005934 cellular bud tip | GO:0000131 incipient cellular bud site | GO:0016459 myosin complex	GO:0000146 microfilament motor activity | GO:0051015 actin filament binding | GO:0005516 calmodulin binding | GO:0005524 ATP binding
Lsqua995			GO:0003676 nucleic acid binding | GO:0046872 metal ion binding
Lsqua996	GO:0006099 tricarboxylic acid cycle | GO:0035335 peptidyl-tyrosine dephosphorylation | GO:0000272 polysaccharide catabolic process		GO:0004725 protein tyrosine phosphatase activity | GO:0030246 carbohydrate binding | GO:0051539 4 iron, 4 sulfur cluster binding | GO:0003994 aconitate hydratase activity
Lsqua997	GO:0008152 metabolic process | GO:0055085 transmembrane transport	GO:0016021 integral to membrane	GO:0022891 substrate-specific transmembrane transporter activity | GO:0016881 acid-amino acid ligase activity
Lsqua998	GO:0008152 metabolic process		GO:0016787 hydrolase activity
Lsqua999	GO:0035786 protein complex oligomerization | GO:0015986 ATP synthesis coupled proton transport	GO:0005886 plasma membrane | GO:0000274 mitochondrial proton-transporting ATP synthase, stator stalk	GO:0046961 proton-transporting ATPase activity, rotational mechanism
Lsqua1000	GO:0006357 regulation of transcription from RNA polymerase II promoter | GO:0046835 carbohydrate phosphorylation	GO:0005634 nucleus	GO:0008662 1-phosphofructokinase activity | GO:0008270 zinc ion binding | GO:0000981 sequence-specific DNA binding RNA polymerase II transcription factor activity | GO:0003677 DNA binding
Lsqua1001	GO:0043087 regulation of GTPase activity | GO:0006620 posttranslational protein targeting to membrane | GO:0000750 pheromone-dependent signal transduction involved in conjugation with cellular fusion | GO:0010038 response to metal ion | GO:0045048 protein insertion into ER membrane | GO:0009408 response to heat | GO:0006890 retrograde vesicle-mediated transport, Golgi to ER | GO:0006200 ATP catab…	GO:0043529 GET complex	GO:0046872 metal ion binding | GO:0016887 ATPase activity | GO:0005524 ATP binding | GO:0005085 guanyl-nucleotide exchange factor activity
Lsqua1002	GO:0008152 metabolic process		GO:0046872 metal ion binding | GO:0003824 catalytic activity
Lsqua1003	GO:0006357 regulation of transcription from RNA polymerase II promoter	GO:0005634 nucleus	GO:0051536 iron-sulfur cluster binding | GO:0008270 zinc ion binding | GO:0000981 sequence-specific DNA binding RNA polymerase II transcription factor activity | GO:0003677 DNA binding
Lsqua1004	GO:0006412 translation | GO:0031929 TOR signaling cascade | GO:0006355 regulation of transcription, DNA-dependent	GO:0031932 TORC2 complex | GO:0015934 large ribosomal subunit | GO:0043189 H4/H2A histone acetyltransferase complex	GO:0003735 structural constituent of ribosome
Lsqua1005	GO:0008152 metabolic process		GO:0016787 hydrolase activity | GO:0046872 metal ion binding
Lsqua1006	GO:0006511 ubiquitin-dependent protein catabolic process	GO:0005737 cytoplasm | GO:0019773 proteasome core complex, alpha-subunit complex | GO:0005634 nucleus	GO:0004298 threonine-type endopeptidase activity
Lsqua1007	GO:0019673 GDP-mannose metabolic process	GO:0005622 intracellular	GO:0008446 GDP-mannose 4,6-dehydratase activity | GO:0050662 coenzyme binding
Lsqua1008	GO:0006355 regulation of transcription, DNA-dependent	GO:0005634 nucleus	GO:0046872 metal ion binding | GO:0003700 sequence-specific DNA binding transcription factor activity | GO:0003676 nucleic acid binding
Lsqua1011	GO:0072488 ammonium transmembrane transport	GO:0016021 integral to membrane	GO:0008519 ammonium transmembrane transporter activity
Lsqua1012	GO:0055114 oxidation-reduction process		GO:0050660 flavin adenine dinucleotide binding | GO:0008762 UDP-N-acetylmuramate dehydrogenase activity
Lsqua1013			GO:0008270 zinc ion binding
Lsqua1014	GO:0006354 transcription elongation, DNA-dependent | GO:0006355 regulation of transcription, DNA-dependent | GO:0010452 histone H3-K36 methylation	GO:0005694 chromosome | GO:0005634 nucleus	GO:0003677 DNA binding | GO:0046975 histone methyltransferase activity (H3-K36 specific)
Lsqua1016	GO:0005976 polysaccharide metabolic process | GO:0009058 biosynthetic process		GO:0016779 nucleotidyltransferase activity
Lsqua1017	GO:0006457 protein folding	GO:0005832 chaperonin-containing T-complex	GO:0005524 ATP binding | GO:0051082 unfolded protein binding
Lsqua1018	GO:0006633 fatty acid biosynthetic process | GO:0055114 oxidation-reduction process | GO:0006696 ergosterol biosynthetic process	GO:0016021 integral to membrane | GO:0005789 endoplasmic reticulum membrane | GO:0005886 plasma membrane	GO:0004497 monooxygenase activity | GO:0005506 iron ion binding
Lsqua1020	GO:0055085 transmembrane transport	GO:0016021 integral to membrane	GO:0005215 transporter activity
Lsqua1021	GO:0008152 metabolic process		GO:0003824 catalytic activity
Lsqua1022	GO:0016567 protein ubiquitination		GO:0004842 ubiquitin-protein ligase activity | GO:0008270 zinc ion binding
Lsqua1024	GO:0006468 protein phosphorylation		GO:0005524 ATP binding | GO:0004674 protein serine/threonine kinase activity
Lsqua1026	GO:0055114 oxidation-reduction process		GO:0016491 oxidoreductase activity
Lsqua1027	GO:0006200 ATP catabolic process | GO:0006508 proteolysis		GO:0008270 zinc ion binding | GO:0016874 ligase activity | GO:0004176 ATP-dependent peptidase activity
Lsqua1029	GO:0055114 oxidation-reduction process		GO:0031418 L-ascorbic acid binding | GO:0005506 iron ion binding | GO:0016706 oxidoreductase activity, acting on paired donors, with incorporation or reduction of molecular oxygen, 2-oxoglutarate as one donor, and incorporation of one atom each of oxygen into both donors
Lsqua1032	GO:0009082 branched chain family amino acid biosynthetic process | GO:0055114 oxidation-reduction process		GO:0004455 ketol-acid reductoisomerase activity | GO:0016853 isomerase activity | GO:0050662 coenzyme binding
Lsqua1036	GO:0030245 cellulose catabolic process	GO:0005576 extracellular region	GO:0008810 cellulase activity | GO:0030248 cellulose binding
Lsqua1037	GO:0006508 proteolysis	GO:0005737 cytoplasm	GO:0008239 dipeptidyl-peptidase activity
Lsqua1038	GO:0055114 oxidation-reduction process | GO:0006629 lipid metabolic process		GO:0016717 oxidoreductase activity, acting on paired donors, with oxidation of a pair of donors resulting in the reduction of molecular oxygen to two molecules of water | GO:0050184 phosphatidylcholine desaturase activity
Lsqua1040	GO:0006470 protein dephosphorylation		GO:0046872 metal ion binding | GO:0004722 protein serine/threonine phosphatase activity
Lsqua1041	GO:0006810 transport	GO:0005622 intracellular	GO:0003676 nucleic acid binding | GO:0000166 nucleotide binding
Lsqua1043	GO:0034220 ion transmembrane transport | GO:0044070 regulation of anion transport | GO:0006821 chloride transport	GO:0016021 integral to membrane	GO:0030554 adenyl nucleotide binding | GO:0005247 voltage-gated chloride channel activity
Lsqua1044	GO:0006950 response to stress	GO:0016021 integral to membrane
Lsqua1045	GO:0006950 response to stress	GO:0016021 integral to membrane
Lsqua1046	GO:0008152 metabolic process		GO:0052689 carboxylic ester hydrolase activity
Lsqua1047	GO:0006508 proteolysis		GO:0004252 serine-type endopeptidase activity
Lsqua1049	GO:0006364 rRNA processing | GO:0042274 ribosomal small subunit biogenesis	GO:0005730 nucleolus | GO:0032040 small-subunit processome | GO:0019013 viral nucleocapsid
Lsqua1052	GO:0055114 oxidation-reduction process | GO:0006979 response to oxidative stress		GO:0020037 heme binding | GO:0016705 oxidoreductase activity, acting on paired donors, with incorporation or reduction of molecular oxygen | GO:0004497 monooxygenase activity | GO:0005506 iron ion binding | GO:0004601 peroxidase activity
Lsqua1053	GO:0006412 translation	GO:0005840 ribosome	GO:0003735 structural constituent of ribosome
Lsqua1056	GO:0008152 metabolic process		GO:0016874 ligase activity
Lsqua1057	GO:0000921 septin ring assembly | GO:0006184 GTP catabolic process | GO:0043934 sporulation | GO:0010458 exit from mitosis	GO:0032160 septin filament array | GO:0001400 mating projection base | GO:0043332 mating projection tip | GO:0005628 prospore membrane | GO:0000144 cellular bud neck septin ring | GO:0005876 spindle microtubule | GO:0031105 septin complex | GO:0072687 meiotic spindle	GO:0005525 GTP binding | GO:0005545 1-phosphatidylinositol binding | GO:0003924 GTPase activity | GO:0032947 protein complex scaffold
Lsqua1058	GO:0006950 response to stress		GO:0005524 ATP binding
Lsqua1059	GO:0006355 regulation of transcription, DNA-dependent | GO:0007165 signal transduction		GO:0003700 sequence-specific DNA binding transcription factor activity | GO:0043565 sequence-specific DNA binding | GO:0004871 signal transducer activity | GO:0008270 zinc ion binding
Lsqua1060			GO:0005524 ATP binding
Lsqua1063		GO:0016021 integral to membrane
Lsqua1064	GO:0006468 protein phosphorylation | GO:0055114 oxidation-reduction process		GO:0004672 protein kinase activity | GO:0020037 heme binding | GO:0005524 ATP binding | GO:0051213 dioxygenase activity
Lsqua1065	GO:0006367 transcription initiation from RNA polymerase II promoter	GO:0005672 transcription factor TFIIA complex
Lsqua1066	GO:0000316 sulfite transport | GO:0055085 transmembrane transport	GO:0016021 integral to membrane
Lsqua1068	GO:0006122 mitochondrial electron transport, ubiquinol to cytochrome c		GO:0008121 ubiquinol-cytochrome-c reductase activity
Lsqua1069	GO:0006412 translation	GO:0015935 small ribosomal subunit	GO:0003735 structural constituent of ribosome | GO:0003723 RNA binding
Lsqua1073	GO:0070588 calcium ion transmembrane transport | GO:0008152 metabolic process	GO:0016021 integral to membrane	GO:0005388 calcium-transporting ATPase activity | GO:0046872 metal ion binding | GO:0005524 ATP binding
Lsqua1074	GO:0006413 translational initiation | GO:0006367 transcription initiation from RNA polymerase II promoter	GO:0005674 transcription factor TFIIF complex	GO:0003743 translation initiation factor activity | GO:0005524 ATP binding | GO:0003824 catalytic activity
Lsqua1076		GO:0005576 extracellular region
Lsqua1077	GO:0055085 transmembrane transport | GO:0006200 ATP catabolic process	GO:0016021 integral to membrane	GO:0042626 ATPase activity, coupled to transmembrane movement of substances | GO:0005524 ATP binding
Lsqua1078	GO:0000054 ribosomal subunit export from nucleus | GO:0006364 rRNA processing | GO:0042273 ribosomal large subunit biogenesis	GO:0005730 nucleolus | GO:0030687 preribosome, large subunit precursor	GO:0016787 hydrolase activity | GO:0005525 GTP binding
Lsqua1081	GO:0006412 translation	GO:0005840 ribosome	GO:0003735 structural constituent of ribosome | GO:0003723 RNA binding
Lsqua1083	GO:0016310 phosphorylation | GO:0005975 carbohydrate metabolic process		GO:0016301 kinase activity | GO:0016773 phosphotransferase activity, alcohol group as acceptor
Lsqua1084	GO:0007163 establishment or maintenance of cell polarity | GO:0030448 hyphal growth | GO:0031505 fungal-type cell wall organization | GO:0070787 conidiophore development | GO:0035269 protein O-linked mannosylation	GO:0016020 membrane	GO:0004169 dolichyl-phosphate-mannose-protein mannosyltransferase activity
Lsqua1085	GO:0006457 protein folding | GO:0032781 positive regulation of ATPase activity | GO:0006950 response to stress	GO:0005829 cytosol	GO:0031072 heat shock protein binding | GO:0051087 chaperone binding | GO:0001671 ATPase activator activity
Lsqua1087	GO:0009231 riboflavin biosynthetic process		GO:0046872 metal ion binding | GO:0008686 3,4-dihydroxy-2-butanone-4-phosphate synthase activity | GO:0016787 hydrolase activity
Lsqua1088	GO:0009231 riboflavin biosynthetic process		GO:0046872 metal ion binding | GO:0008686 3,4-dihydroxy-2-butanone-4-phosphate synthase activity | GO:0016787 hydrolase activity
Lsqua1092	GO:0008152 metabolic process		GO:0003824 catalytic activity
Lsqua1093	GO:0016192 vesicle-mediated transport	GO:0016020 membrane
Lsqua1095	GO:0006413 translational initiation		GO:0003743 translation initiation factor activity
Lsqua1096	GO:0006121 mitochondrial electron transport, succinate to ubiquinone | GO:0006334 nucleosome assembly | GO:0018293 protein-FAD linkage	GO:0000786 nucleosome | GO:0005739 mitochondrion | GO:0005634 nucleus	GO:0003677 DNA binding | GO:0046982 protein heterodimerization activity
Lsqua1099	GO:0032259 methylation		GO:0008270 zinc ion binding | GO:0008168 methyltransferase activity
Lsqua1101			GO:0008270 zinc ion binding
Lsqua1102	GO:0006355 regulation of transcription, DNA-dependent	GO:0005634 nucleus	GO:0046872 metal ion binding | GO:0003700 sequence-specific DNA binding transcription factor activity | GO:0003676 nucleic acid binding
Lsqua1103	GO:0070681 glutaminyl-tRNAGln biosynthesis via transamidation | GO:0032543 mitochondrial translation	GO:0005739 mitochondrion | GO:0030956 glutamyl-tRNA(Gln) amidotransferase complex	GO:0050567 glutaminyl-tRNA synthase (glutamine-hydrolyzing) activity | GO:0005524 ATP binding | GO:0016740 transferase activity
Lsqua1105	GO:0043581 mycelium development | GO:0008152 metabolic process		GO:0005524 ATP binding | GO:0017111 nucleoside-triphosphatase activity
Lsqua1106	GO:0008152 metabolic process		GO:0016787 hydrolase activity
Lsqua1108	GO:0009231 riboflavin biosynthetic process | GO:0070084 protein initiator methionine removal | GO:0006508 proteolysis | GO:0055114 oxidation-reduction process	GO:0005737 cytoplasm	GO:0046872 metal ion binding | GO:0070006 metalloaminopeptidase activity | GO:0008703 5-amino-6-(5-phosphoribosylamino)uracil reductase activity
Lsqua1111			GO:0008270 zinc ion binding
Lsqua1112	GO:0005975 carbohydrate metabolic process		GO:0004553 hydrolase activity, hydrolyzing O-glycosyl compounds
Lsqua1113	GO:0005975 carbohydrate metabolic process		GO:0004553 hydrolase activity, hydrolyzing O-glycosyl compounds
Lsqua1118			GO:0003725 double-stranded RNA binding
Lsqua1119	GO:0006511 ubiquitin-dependent protein catabolic process		GO:0008234 cysteine-type peptidase activity
Lsqua1120	GO:0055114 oxidation-reduction process		GO:0016491 oxidoreductase activity
Lsqua1121	GO:0006633 fatty acid biosynthetic process	GO:0005759 mitochondrial matrix
Lsqua1122	GO:0035556 intracellular signal transduction | GO:0018108 peptidyl-tyrosine phosphorylation | GO:0046854 phosphatidylinositol phosphorylation		GO:0046872 metal ion binding | GO:0016307 phosphatidylinositol phosphate kinase activity | GO:0004713 protein tyrosine kinase activity | GO:0005524 ATP binding
Lsqua1124	GO:0009651 response to salt stress | GO:0048366 leaf development | GO:0006487 protein N-linked glycosylation	GO:0016021 integral to membrane | GO:0016023 cytoplasmic membrane-bounded vesicle | GO:0005783 endoplasmic reticulum	GO:0046527 glucosyltransferase activity
Lsqua1125	GO:0006006 glucose metabolic process | GO:0055114 oxidation-reduction process		GO:0051287 NAD binding | GO:0004365 glyceraldehyde-3-phosphate dehydrogenase (NAD+) (phosphorylating) activity | GO:0050661 NADP binding
Lsqua1127	GO:0043581 mycelium development | GO:0055085 transmembrane transport	GO:0016021 integral to membrane	GO:0005215 transporter activity
Lsqua1130	GO:0055114 oxidation-reduction process | GO:0045892 negative regulation of transcription, DNA-dependent		GO:0016491 oxidoreductase activity | GO:0010181 FMN binding
Lsqua1131	GO:0055114 oxidation-reduction process | GO:0045892 negative regulation of transcription, DNA-dependent		GO:0016491 oxidoreductase activity | GO:0010181 FMN binding
Lsqua1135	GO:0006355 regulation of transcription, DNA-dependent	GO:0005634 nucleus	GO:0003700 sequence-specific DNA binding transcription factor activity | GO:0043565 sequence-specific DNA binding
Lsqua1136	GO:0006355 regulation of transcription, DNA-dependent	GO:0005634 nucleus	GO:0003700 sequence-specific DNA binding transcription factor activity | GO:0043565 sequence-specific DNA binding
Lsqua1137			GO:0000166 nucleotide binding
Lsqua1138	GO:0006413 translational initiation | GO:0006200 ATP catabolic process		GO:0003743 translation initiation factor activity | GO:0051536 iron-sulfur cluster binding | GO:0005524 ATP binding | GO:0016887 ATPase activity
Lsqua1139	GO:0008152 metabolic process		GO:0016758 transferase activity, transferring hexosyl groups
Lsqua1140	GO:0008152 metabolic process		GO:0016758 transferase activity, transferring hexosyl groups
Lsqua1141	GO:0008152 metabolic process		GO:0016758 transferase activity, transferring hexosyl groups
Lsqua1142	GO:0008152 metabolic process		GO:0016758 transferase activity, transferring hexosyl groups
Lsqua1145	GO:0006777 Mo-molybdopterin cofactor biosynthetic process	GO:0019008 molybdopterin synthase complex	GO:0046872 metal ion binding | GO:0051539 4 iron, 4 sulfur cluster binding | GO:0003824 catalytic activity
Lsqua1146	GO:0034599 cellular response to oxidative stress | GO:0000304 response to singlet oxygen | GO:0009631 cold acclimation | GO:0030091 protein repair | GO:0055114 oxidation-reduction process	GO:0009570 chloroplast stroma | GO:0005634 nucleus	GO:0033743 peptide-methionine (R)-S-oxide reductase activity | GO:0070191 methionine-R-sulfoxide reductase activity
Lsqua1149	GO:0055114 oxidation-reduction process		GO:0016620 oxidoreductase activity, acting on the aldehyde or oxo group of donors, NAD or NADP as acceptor
Lsqua1151	GO:0006200 ATP catabolic process | GO:0006508 proteolysis		GO:0008270 zinc ion binding | GO:0004176 ATP-dependent peptidase activity
Lsqua1153	GO:0006099 tricarboxylic acid cycle	GO:0045281 succinate dehydrogenase complex | GO:0005886 plasma membrane	GO:0000104 succinate dehydrogenase activity | GO:0009055 electron carrier activity
Lsqua1154	GO:0006508 proteolysis	GO:0005615 extracellular space	GO:0004222 metalloendopeptidase activity | GO:0008270 zinc ion binding
Lsqua1155	GO:0005975 carbohydrate metabolic process		GO:0004614 phosphoglucomutase activity | GO:0000287 magnesium ion binding
Lsqua1158	GO:0006810 transport | GO:0006200 ATP catabolic process	GO:0005622 intracellular	GO:0003723 RNA binding | GO:0008026 ATP-dependent helicase activity | GO:0005524 ATP binding
Lsqua1161	GO:0031204 posttranslational protein targeting to membrane, translocation	GO:0005622 intracellular	GO:0008565 protein transporter activity
Lsqua1162	GO:0008152 metabolic process		GO:0016747 transferase activity, transferring acyl groups other than amino-acyl groups
Lsqua1163	GO:0006457 protein folding | GO:0009408 response to heat		GO:0046872 metal ion binding | GO:0031072 heat shock protein binding | GO:0005524 ATP binding | GO:0051082 unfolded protein binding
Lsqua1164			GO:0008270 zinc ion binding
Lsqua1165			GO:0008270 zinc ion binding
Lsqua1166	GO:0006334 nucleosome assembly	GO:0000786 nucleosome | GO:0005634 nucleus	GO:0003677 DNA binding | GO:0046982 protein heterodimerization activity
Lsqua1167			GO:0005199 structural constituent of cell wall
Lsqua1168	GO:0055085 transmembrane transport	GO:0016020 membrane	GO:0005215 transporter activity
Lsqua1169	GO:0006511 ubiquitin-dependent protein catabolic process	GO:0005737 cytoplasm | GO:0019773 proteasome core complex, alpha-subunit complex | GO:0005634 nucleus	GO:0004298 threonine-type endopeptidase activity
Lsqua1172	GO:0055085 transmembrane transport
Lsqua1175	GO:0005975 carbohydrate metabolic process		GO:0016810 hydrolase activity, acting on carbon-nitrogen (but not peptide) bonds
Lsqua1177	GO:0055085 transmembrane transport	GO:0016021 integral to membrane
Lsqua1179	GO:0006412 translation	GO:0015935 small ribosomal subunit | GO:0005739 mitochondrion	GO:0003735 structural constituent of ribosome | GO:0019843 rRNA binding | GO:0000049 tRNA binding
Lsqua1180			GO:0008270 zinc ion binding
Lsqua1181	GO:0006537 glutamate biosynthetic process | GO:0006562 proline catabolic process | GO:0055114 oxidation-reduction process		GO:0004657 proline dehydrogenase activity
Lsqua1182	GO:0006537 glutamate biosynthetic process | GO:0006562 proline catabolic process | GO:0055114 oxidation-reduction process		GO:0004657 proline dehydrogenase activity
Lsqua1183	GO:0006537 glutamate biosynthetic process | GO:0006562 proline catabolic process | GO:0055114 oxidation-reduction process		GO:0004657 proline dehydrogenase activity
Lsqua1184	GO:0015693 magnesium ion transport	GO:0016020 membrane	GO:0015095 magnesium ion transmembrane transporter activity
Lsqua1185	GO:0055085 transmembrane transport | GO:0008643 carbohydrate transport	GO:0016021 integral to membrane	GO:0022891 substrate-specific transmembrane transporter activity
Lsqua1188	GO:0008152 metabolic process		GO:0016779 nucleotidyltransferase activity
Lsqua1190	GO:0006468 protein phosphorylation		GO:0005524 ATP binding | GO:0004674 protein serine/threonine kinase activity
Lsqua1191	GO:0055114 oxidation-reduction process		GO:0008270 zinc ion binding | GO:0016491 oxidoreductase activity
Lsqua1192	GO:0055114 oxidation-reduction process		GO:0008270 zinc ion binding | GO:0016491 oxidoreductase activity
Lsqua1193	GO:0055114 oxidation-reduction process		GO:0008270 zinc ion binding | GO:0016491 oxidoreductase activity
Lsqua1195	GO:0055114 oxidation-reduction process | GO:0009308 amine metabolic process		GO:0005507 copper ion binding | GO:0048038 quinone binding | GO:0008131 primary amine oxidase activity
Lsqua1196	GO:0055085 transmembrane transport | GO:0006200 ATP catabolic process	GO:0016021 integral to membrane	GO:0042626 ATPase activity, coupled to transmembrane movement of substances | GO:0005524 ATP binding
Lsqua1198	GO:0016567 protein ubiquitination		GO:0004842 ubiquitin-protein ligase activity
Lsqua1199			GO:0046872 metal ion binding
Lsqua1200	GO:0006355 regulation of transcription, DNA-dependent		GO:0003700 sequence-specific DNA binding transcription factor activity | GO:0043565 sequence-specific DNA binding | GO:0008270 zinc ion binding
Lsqua1201	GO:0006355 regulation of transcription, DNA-dependent		GO:0003700 sequence-specific DNA binding transcription factor activity | GO:0043565 sequence-specific DNA binding | GO:0008270 zinc ion binding
Lsqua1202	GO:0006355 regulation of transcription, DNA-dependent		GO:0003700 sequence-specific DNA binding transcription factor activity | GO:0043565 sequence-specific DNA binding | GO:0008270 zinc ion binding
Lsqua1203	GO:0006468 protein phosphorylation		GO:0005524 ATP binding | GO:0004674 protein serine/threonine kinase activity
Lsqua1204	GO:0008152 metabolic process		GO:0016874 ligase activity
Lsqua1206	GO:0000398 nuclear mRNA splicing, via spliceosome	GO:0005681 spliceosomal complex	GO:0017070 U6 snRNA binding | GO:0030623 U5 snRNA binding
Lsqua1207	GO:0006351 transcription, DNA-dependent		GO:0003899 DNA-directed RNA polymerase activity | GO:0003677 DNA binding | GO:0032549 ribonucleoside binding
Lsqua1208	GO:0008152 metabolic process	GO:0016021 integral to membrane	GO:0016757 transferase activity, transferring glycosyl groups
Lsqua1209	GO:0008152 metabolic process		GO:0016787 hydrolase activity
Lsqua1211	GO:0009098 leucine biosynthetic process	GO:0005739 mitochondrion	GO:0003852 2-isopropylmalate synthase activity
Lsqua1215		GO:0005634 nucleus	GO:0003677 DNA binding | GO:0008270 zinc ion binding
Lsqua1216	GO:0006886 intracellular protein transport	GO:0005737 cytoplasm
Lsqua1217	GO:0044275 cellular carbohydrate catabolic process | GO:0000272 polysaccharide catabolic process	GO:0005576 extracellular region	GO:0032450 maltose alpha-glucosidase activity | GO:0030246 carbohydrate binding | GO:0008422 beta-glucosidase activity
Lsqua1219	GO:0055114 oxidation-reduction process		GO:0005507 copper ion binding | GO:0004322 ferroxidase activity
Lsqua1221	GO:0009107 lipoate biosynthetic process		GO:0046872 metal ion binding | GO:0016992 lipoate synthase activity | GO:0009055 electron carrier activity | GO:0051537 2 iron, 2 sulfur cluster binding | GO:0051539 4 iron, 4 sulfur cluster binding
Lsqua1222	GO:0008152 metabolic process		GO:0016787 hydrolase activity
Lsqua1223	GO:0008152 metabolic process		GO:0016787 hydrolase activity
Lsqua1224	GO:0006508 proteolysis		GO:0008236 serine-type peptidase activity
Lsqua1225	GO:0035999 tetrahydrofolate interconversion | GO:0006555 methionine metabolic process | GO:0055114 oxidation-reduction process	GO:0005739 mitochondrion	GO:0004489 methylenetetrahydrofolate reductase (NADPH) activity
Lsqua1226	GO:0006457 protein folding | GO:0045454 cell redox homeostasis | GO:0006662 glycerol ether metabolic process | GO:0055114 oxidation-reduction process	GO:0005783 endoplasmic reticulum	GO:0047134 protein-disulfide reductase activity | GO:0003756 protein disulfide isomerase activity | GO:0015035 protein disulfide oxidoreductase activity
Lsqua1227	GO:0015986 ATP synthesis coupled proton transport | GO:0006200 ATP catabolic process	GO:0000276 mitochondrial proton-transporting ATP synthase complex, coupling factor F(o)	GO:0046961 proton-transporting ATPase activity, rotational mechanism | GO:0046933 hydrogen ion transporting ATP synthase activity, rotational mechanism
Lsqua1228	GO:0015986 ATP synthesis coupled proton transport | GO:0006200 ATP catabolic process	GO:0000276 mitochondrial proton-transporting ATP synthase complex, coupling factor F(o)	GO:0046961 proton-transporting ATPase activity, rotational mechanism | GO:0046933 hydrogen ion transporting ATP synthase activity, rotational mechanism
Lsqua1230	GO:0006412 translation	GO:0005761 mitochondrial ribosome	GO:0003735 structural constituent of ribosome
Lsqua1231	GO:0006412 translation	GO:0005761 mitochondrial ribosome	GO:0003735 structural constituent of ribosome
Lsqua1232	GO:0016567 protein ubiquitination		GO:0030170 pyridoxal phosphate binding | GO:0004842 ubiquitin-protein ligase activity | GO:0008483 transaminase activity
Lsqua1233	GO:0006468 protein phosphorylation		GO:0005524 ATP binding | GO:0004674 protein serine/threonine kinase activity
Lsqua1234	GO:0007264 small GTPase mediated signal transduction	GO:0005622 intracellular | GO:0016020 membrane	GO:0005525 GTP binding
Lsqua1235	GO:0006801 superoxide metabolic process | GO:0055114 oxidation-reduction process		GO:0046872 metal ion binding | GO:0004784 superoxide dismutase activity
Lsqua1236	GO:0055114 oxidation-reduction process		GO:0004601 peroxidase activity
Lsqua1237	GO:0018108 peptidyl-tyrosine phosphorylation		GO:0004713 protein tyrosine kinase activity
Lsqua1238			GO:0008270 zinc ion binding | GO:0003676 nucleic acid binding
Lsqua1239	GO:0045859 regulation of protein kinase activity	GO:0005956 protein kinase CK2 complex	GO:0019887 protein kinase regulator activity | GO:0016301 kinase activity
Lsqua1242	GO:0015693 magnesium ion transport	GO:0016020 membrane	GO:0015095 magnesium ion transmembrane transporter activity
Lsqua1243	GO:0030447 filamentous growth | GO:0030950 establishment or maintenance of actin cytoskeleton polarity | GO:0032312 regulation of ARF GTPase activity | GO:0006897 endocytosis | GO:0035690 cellular response to drug | GO:0043547 positive regulation of GTPase activity | GO:0009405 pathogenesis		GO:0008270 zinc ion binding | GO:0008060 ARF GTPase activator activity
Lsqua1244	GO:0016106 sesquiterpenoid biosynthetic process		GO:0045482 trichodiene synthase activity
Lsqua1245	GO:0019725 cellular homeostasis | GO:0006355 regulation of transcription, DNA-dependent | GO:0043687 post-translational protein modification | GO:0006352 transcription initiation, DNA-dependent | GO:0016266 O-glycan processing	GO:0005796 Golgi lumen | GO:0016021 integral to membrane | GO:0009897 external side of plasma membrane | GO:0016324 apical plasma membrane | GO:0005576 extracellular region	GO:0005509 calcium ion binding | GO:0003677 DNA binding | GO:0030165 PDZ domain binding | GO:0030197 extracellular matrix constituent, lubricant activity | GO:0003700 sequence-specific DNA binding transcription factor activity | GO:0016987 sigma factor activity | GO:0030246 carbohydrate binding
Lsqua1247	GO:0006396 RNA processing	GO:0005634 nucleus
Lsqua1248	GO:0006468 protein phosphorylation		GO:0005524 ATP binding | GO:0004674 protein serine/threonine kinase activity
Lsqua1249	GO:0055114 oxidation-reduction process		GO:0016491 oxidoreductase activity | GO:0000166 nucleotide binding
Lsqua1250	GO:0005975 carbohydrate metabolic process | GO:0071555 cell wall organization | GO:0006364 rRNA processing | GO:0032259 methylation	GO:0005618 cell wall	GO:0008757 S-adenosylmethionine-dependent methyltransferase activity | GO:0004553 hydrolase activity, hydrolyzing O-glycosyl compounds | GO:0003723 RNA binding
Lsqua1251	GO:0006355 regulation of transcription, DNA-dependent		GO:0003677 DNA binding
Lsqua1254	GO:0006627 protein processing involved in protein targeting to mitochondrion | GO:0006508 proteolysis	GO:0017087 mitochondrial processing peptidase complex	GO:0046872 metal ion binding | GO:0004222 metalloendopeptidase activity
Lsqua1255	GO:0008654 phospholipid biosynthetic process		GO:0005509 calcium ion binding | GO:0004609 phosphatidylserine decarboxylase activity
Lsqua1256	GO:0006508 proteolysis		GO:0008236 serine-type peptidase activity
Lsqua1258	GO:0055085 transmembrane transport	GO:0016021 integral to membrane	GO:0022891 substrate-specific transmembrane transporter activity
Lsqua1259	GO:0044237 cellular metabolic process		GO:0048040 UDP-glucuronate decarboxylase activity | GO:0050662 coenzyme binding
Lsqua1261	GO:0055114 oxidation-reduction process | GO:0006177 GMP biosynthetic process	GO:0005737 cytoplasm	GO:0030554 adenyl nucleotide binding | GO:0046872 metal ion binding | GO:0003938 IMP dehydrogenase activity
Lsqua1262	GO:0006122 mitochondrial electron transport, ubiquinol to cytochrome c		GO:0008121 ubiquinol-cytochrome-c reductase activity
Lsqua1263	GO:0055085 transmembrane transport	GO:0016021 integral to membrane	GO:0005215 transporter activity
Lsqua1264	GO:0070588 calcium ion transmembrane transport | GO:0008152 metabolic process	GO:0016021 integral to membrane	GO:0005388 calcium-transporting ATPase activity | GO:0046872 metal ion binding | GO:0005524 ATP binding
Lsqua1265			GO:0045735 nutrient reservoir activity
Lsqua1266	GO:0055085 transmembrane transport	GO:0016021 integral to membrane
Lsqua1267	GO:0055085 transmembrane transport	GO:0005743 mitochondrial inner membrane | GO:0016021 integral to membrane	GO:0005509 calcium ion binding | GO:0005215 transporter activity
Lsqua1268	GO:0006357 regulation of transcription from RNA polymerase II promoter	GO:0005634 nucleus	GO:0051536 iron-sulfur cluster binding | GO:0008270 zinc ion binding | GO:0000981 sequence-specific DNA binding RNA polymerase II transcription factor activity | GO:0003677 DNA binding
Lsqua1269	GO:0006508 proteolysis	GO:0005737 cytoplasm	GO:0030145 manganese ion binding | GO:0008235 metalloexopeptidase activity | GO:0004177 aminopeptidase activity
Lsqua1270	GO:0006508 proteolysis	GO:0005634 nucleus | GO:0005739 mitochondrion	GO:0030145 manganese ion binding | GO:0008235 metalloexopeptidase activity | GO:0004177 aminopeptidase activity
Lsqua1273			GO:0003676 nucleic acid binding | GO:0046872 metal ion binding
Lsqua1274	GO:0016310 phosphorylation | GO:0046677 response to antibiotic		GO:0016773 phosphotransferase activity, alcohol group as acceptor | GO:0016301 kinase activity | GO:0005524 ATP binding
Lsqua1276	GO:0006437 tyrosyl-tRNA aminoacylation | GO:0006189 'de novo' IMP biosynthetic process	GO:0005737 cytoplasm	GO:0004639 phosphoribosylaminoimidazolesuccinocarboxamide synthase activity | GO:0005524 ATP binding | GO:0004831 tyrosine-tRNA ligase activity
Lsqua1279	GO:0006508 proteolysis		GO:0004190 aspartic-type endopeptidase activity
Lsqua1286	GO:0008152 metabolic process		GO:0016881 acid-amino acid ligase activity
Lsqua1287			GO:0003677 DNA binding | GO:0003682 chromatin binding
Lsqua1288	GO:0055114 oxidation-reduction process		GO:0016491 oxidoreductase activity
Lsqua1292		GO:0005639 integral to nuclear inner membrane	GO:0008270 zinc ion binding
Lsqua1293	GO:0006200 ATP catabolic process | GO:0006397 mRNA processing		GO:0003676 nucleic acid binding | GO:0008026 ATP-dependent helicase activity | GO:0005524 ATP binding
Lsqua1294	GO:0006890 retrograde vesicle-mediated transport, Golgi to ER		GO:0005198 structural molecule activity
Lsqua1295	GO:0032319 regulation of Rho GTPase activity | GO:0043547 positive regulation of GTPase activity	GO:0005622 intracellular	GO:0005089 Rho guanyl-nucleotide exchange factor activity | GO:0046872 metal ion binding | GO:0005096 GTPase activator activity
Lsqua1296	GO:0055114 oxidation-reduction process		GO:0016706 oxidoreductase activity, acting on paired donors, with incorporation or reduction of molecular oxygen, 2-oxoglutarate as one donor, and incorporation of one atom each of oxygen into both donors
Lsqua1297	GO:0055085 transmembrane transport | GO:0006468 protein phosphorylation	GO:0016021 integral to membrane	GO:0016787 hydrolase activity | GO:0005524 ATP binding | GO:0004674 protein serine/threonine kinase activity
Lsqua1298	GO:0007189 activation of adenylate cyclase activity by G-protein signaling pathway | GO:0006184 GTP catabolic process		GO:0004871 signal transducer activity | GO:0031683 G-protein beta/gamma-subunit complex binding | GO:0003924 GTPase activity | GO:0001664 G-protein coupled receptor binding | GO:0005525 GTP binding
Lsqua1300	GO:0055114 oxidation-reduction process		GO:0016491 oxidoreductase activity
Lsqua1301	GO:0055085 transmembrane transport | GO:0006189 'de novo' IMP biosynthetic process	GO:0016021 integral to membrane	GO:0005215 transporter activity | GO:0004642 phosphoribosylformylglycinamidine synthase activity
Lsqua1302	GO:0007264 small GTPase mediated signal transduction | GO:0015031 protein transport		GO:0005525 GTP binding
Lsqua1303	GO:0045733 acetate catabolic process		GO:0004092 carnitine O-acetyltransferase activity
Lsqua1304	GO:0001172 transcription, RNA-dependent		GO:0046872 metal ion binding | GO:0003676 nucleic acid binding | GO:0003968 RNA-directed RNA polymerase activity | GO:0000166 nucleotide binding
Lsqua1307	GO:0006412 translation	GO:0005840 ribosome	GO:0003735 structural constituent of ribosome
Lsqua1308	GO:0008152 metabolic process		GO:0016787 hydrolase activity
Lsqua1309	GO:0046939 nucleotide phosphorylation | GO:0006207 'de novo' pyrimidine base biosynthetic process	GO:0005737 cytoplasm | GO:0005634 nucleus	GO:0004017 adenylate kinase activity | GO:0005524 ATP binding | GO:0009041 uridylate kinase activity
Lsqua1310	GO:0046939 nucleotide phosphorylation | GO:0006207 'de novo' pyrimidine base biosynthetic process	GO:0005737 cytoplasm | GO:0005634 nucleus	GO:0004017 adenylate kinase activity | GO:0005524 ATP binding | GO:0009041 uridylate kinase activity
Lsqua1312	GO:0018108 peptidyl-tyrosine phosphorylation	GO:0016021 integral to membrane	GO:0004713 protein tyrosine kinase activity
Lsqua1313	GO:0006468 protein phosphorylation		GO:0005524 ATP binding | GO:0004674 protein serine/threonine kinase activity
Lsqua1314	GO:0055085 transmembrane transport | GO:0006200 ATP catabolic process	GO:0016021 integral to membrane	GO:0042626 ATPase activity, coupled to transmembrane movement of substances | GO:0005524 ATP binding
Lsqua1315	GO:0008152 metabolic process		GO:0017111 nucleoside-triphosphatase activity | GO:0005524 ATP binding
Lsqua1318	GO:0006278 RNA-dependent DNA replication | GO:0015074 DNA integration	GO:0019013 viral nucleocapsid | GO:0005634 nucleus	GO:0003964 RNA-directed DNA polymerase activity | GO:0003723 RNA binding | GO:0008270 zinc ion binding
Lsqua1319	GO:0006468 protein phosphorylation		GO:0005524 ATP binding | GO:0004674 protein serine/threonine kinase activity
Lsqua1320	GO:0055085 transmembrane transport	GO:0016020 membrane	GO:0005509 calcium ion binding
Lsqua1322	GO:0001522 pseudouridine synthesis | GO:0006396 RNA processing		GO:0003723 RNA binding | GO:0009982 pseudouridine synthase activity
Lsqua1325	GO:0055114 oxidation-reduction process		GO:0020037 heme binding | GO:0016705 oxidoreductase activity, acting on paired donors, with incorporation or reduction of molecular oxygen | GO:0004497 monooxygenase activity | GO:0005506 iron ion binding
Lsqua1326	GO:0055114 oxidation-reduction process		GO:0020037 heme binding | GO:0005506 iron ion binding | GO:0009055 electron carrier activity | GO:0070330 aromatase activity
Lsqua1327	GO:0016226 iron-sulfur cluster assembly		GO:0005198 structural molecule activity | GO:0051536 iron-sulfur cluster binding
Lsqua1328	GO:0055114 oxidation-reduction process		GO:0020037 heme binding | GO:0016705 oxidoreductase activity, acting on paired donors, with incorporation or reduction of molecular oxygen | GO:0004497 monooxygenase activity | GO:0005506 iron ion binding
Lsqua1329	GO:0006574 valine catabolic process | GO:0019626 short-chain fatty acid catabolic process | GO:0006550 isoleucine catabolic process	GO:0005739 mitochondrion	GO:0016853 isomerase activity
Lsqua1330	GO:0006468 protein phosphorylation		GO:0005524 ATP binding | GO:0004674 protein serine/threonine kinase activity
Lsqua1331	GO:0055114 oxidation-reduction process		GO:0050660 flavin adenine dinucleotide binding | GO:0003995 acyl-CoA dehydrogenase activity
Lsqua1332	GO:0006261 DNA-dependent DNA replication		GO:0003887 DNA-directed DNA polymerase activity | GO:0003677 DNA binding | GO:0008270 zinc ion binding
Lsqua1338	GO:0055114 oxidation-reduction process	GO:0016021 integral to membrane	GO:0050660 flavin adenine dinucleotide binding | GO:0008762 UDP-N-acetylmuramate dehydrogenase activity
Lsqua1339		GO:0016021 integral to membrane
Lsqua1340	GO:0006412 translation	GO:0005840 ribosome	GO:0003735 structural constituent of ribosome
Lsqua1341	GO:0006348 chromatin silencing at telomere | GO:0016573 histone acetylation	GO:0000123 histone acetyltransferase complex	GO:0042393 histone binding | GO:0004402 histone acetyltransferase activity
Lsqua1342	GO:0006412 translation	GO:0005840 ribosome	GO:0003735 structural constituent of ribosome
Lsqua1344	GO:0008152 metabolic process		GO:0004802 transketolase activity
Lsqua1345	GO:0007018 microtubule-based movement | GO:0008152 metabolic process	GO:0005874 microtubule	GO:0008017 microtubule binding | GO:0005524 ATP binding | GO:0003777 microtubule motor activity
Lsqua1346	GO:0006457 protein folding | GO:0000413 protein peptidyl-prolyl isomerization		GO:0003755 peptidyl-prolyl cis-trans isomerase activity
Lsqua1347	GO:0015986 ATP synthesis coupled proton transport	GO:0005756 mitochondrial proton-transporting ATP synthase, central stalk	GO:0046961 proton-transporting ATPase activity, rotational mechanism | GO:0046933 hydrogen ion transporting ATP synthase activity, rotational mechanism
Lsqua1348			GO:0003676 nucleic acid binding | GO:0000166 nucleotide binding
Lsqua1349	GO:0006413 translational initiation	GO:0005852 eukaryotic translation initiation factor 3 complex	GO:0031369 translation initiation factor binding | GO:0003743 translation initiation factor activity | GO:0008270 zinc ion binding
Lsqua1350	GO:0006801 superoxide metabolic process | GO:0055114 oxidation-reduction process		GO:0046872 metal ion binding | GO:0004784 superoxide dismutase activity
Lsqua1351			GO:0008270 zinc ion binding | GO:0003676 nucleic acid binding
Lsqua1353	GO:0006355 regulation of transcription, DNA-dependent	GO:0005634 nucleus	GO:0003677 DNA binding | GO:0005524 ATP binding | GO:0004386 helicase activity
Lsqua1354	GO:0006891 intra-Golgi vesicle-mediated transport | GO:0006888 ER to Golgi vesicle-mediated transport | GO:0032313 regulation of Rab GTPase activity	GO:0030008 TRAPP complex | GO:0033106 cis-Golgi network membrane	GO:0017112 Rab guanyl-nucleotide exchange factor activity
Lsqua1357		GO:0005750 mitochondrial respiratory chain complex III	GO:0005506 iron ion binding | GO:0020037 heme binding | GO:0045153 electron transporter, transferring electrons within CoQH2-cytochrome c reductase complex activity
Lsqua1358	GO:0006810 transport	GO:0005643 nuclear pore
Lsqua1359	GO:0006099 tricarboxylic acid cycle		GO:0004591 oxoglutarate dehydrogenase (succinyl-transferring) activity | GO:0030976 thiamine pyrophosphate binding
Lsqua1360	GO:0006031 chitin biosynthetic process	GO:0016021 integral to membrane	GO:0004100 chitin synthase activity
Lsqua1361	GO:0055114 oxidation-reduction process		GO:0020037 heme binding | GO:0016705 oxidoreductase activity, acting on paired donors, with incorporation or reduction of molecular oxygen | GO:0004497 monooxygenase activity | GO:0005506 iron ion binding
Lsqua1364	GO:0006106 fumarate metabolic process | GO:0006099 tricarboxylic acid cycle	GO:0045239 tricarboxylic acid cycle enzyme complex | GO:0005759 mitochondrial matrix | GO:0005829 cytosol	GO:0004333 fumarate hydratase activity
Lsqua1365	GO:0006106 fumarate metabolic process | GO:0006099 tricarboxylic acid cycle	GO:0045239 tricarboxylic acid cycle enzyme complex	GO:0016853 isomerase activity | GO:0004333 fumarate hydratase activity
Lsqua1366		GO:0005634 nucleus
Lsqua1367			GO:0008270 zinc ion binding
Lsqua1368			GO:0043565 sequence-specific DNA binding
Lsqua1370	GO:0006508 proteolysis		GO:0004185 serine-type carboxypeptidase activity
Lsqua1371	GO:0090305 nucleic acid phosphodiester bond hydrolysis | GO:0006308 DNA catabolic process		GO:0004519 endonuclease activity | GO:0003676 nucleic acid binding
Lsqua1372	GO:0090305 nucleic acid phosphodiester bond hydrolysis | GO:0006308 DNA catabolic process		GO:0004519 endonuclease activity | GO:0003676 nucleic acid binding
Lsqua1373			GO:0046872 metal ion binding
Lsqua1374	GO:0055114 oxidation-reduction process		GO:0016491 oxidoreductase activity
Lsqua1381		GO:0016021 integral to membrane
Lsqua1382	GO:0055114 oxidation-reduction process		GO:0020037 heme binding | GO:0016705 oxidoreductase activity, acting on paired donors, with incorporation or reduction of molecular oxygen | GO:0004497 monooxygenase activity | GO:0005506 iron ion binding
Lsqua1383	GO:0009800 cinnamic acid biosynthetic process | GO:0006559 L-phenylalanine catabolic process	GO:0005737 cytoplasm	GO:0045548 phenylalanine ammonia-lyase activity
Lsqua1384	GO:2000601 positive regulation of Arp2/3 complex-mediated actin nucleation | GO:0006897 endocytosis	GO:0009506 plasmodesma | GO:0030479 actin cortical patch	GO:0003779 actin binding
Lsqua1385	GO:0045039 protein import into mitochondrial inner membrane	GO:0005739 mitochondrion	GO:0046872 metal ion binding
Lsqua1387	GO:0007264 small GTPase mediated signal transduction | GO:0006184 GTP catabolic process	GO:0005886 plasma membrane	GO:0005525 GTP binding
Lsqua1390	GO:0006457 protein folding | GO:0006950 response to stress		GO:0051082 unfolded protein binding
Lsqua1392	GO:0006260 DNA replication | GO:0006355 regulation of transcription, DNA-dependent | GO:0006281 DNA repair	GO:0005694 chromosome | GO:0005634 nucleus
Lsqua1393			GO:0046872 metal ion binding
Lsqua1394	GO:0055085 transmembrane transport | GO:0008643 carbohydrate transport	GO:0016021 integral to membrane	GO:0022891 substrate-specific transmembrane transporter activity
Lsqua1399	GO:0055114 oxidation-reduction process		GO:0008270 zinc ion binding | GO:0016491 oxidoreductase activity
Lsqua1400	GO:0006200 ATP catabolic process		GO:0008270 zinc ion binding | GO:0008026 ATP-dependent helicase activity | GO:0003677 DNA binding | GO:0005524 ATP binding
Lsqua1401	GO:0006412 translation	GO:0005840 ribosome	GO:0003735 structural constituent of ribosome
Lsqua1402	GO:0055114 oxidation-reduction process | GO:0016042 lipid catabolic process | GO:0006979 response to oxidative stress	GO:0016021 integral to membrane	GO:0020037 heme binding | GO:0016787 hydrolase activity | GO:0004601 peroxidase activity
Lsqua1403	GO:0051258 protein polymerization | GO:0006184 GTP catabolic process | GO:0007017 microtubule-based process	GO:0005874 microtubule | GO:0005737 cytoplasm	GO:0003924 GTPase activity | GO:0005200 structural constituent of cytoskeleton | GO:0005525 GTP binding
Lsqua1404	GO:0051258 protein polymerization | GO:0006184 GTP catabolic process | GO:0007017 microtubule-based process	GO:0005874 microtubule | GO:0005737 cytoplasm	GO:0003924 GTPase activity | GO:0005200 structural constituent of cytoskeleton | GO:0005525 GTP binding
Lsqua1406	GO:0005975 carbohydrate metabolic process		GO:0004553 hydrolase activity, hydrolyzing O-glycosyl compounds
Lsqua1407	GO:0006397 mRNA processing		GO:0003676 nucleic acid binding | GO:0000166 nucleotide binding
Lsqua1409	GO:0055085 transmembrane transport	GO:0016021 integral to membrane	GO:0005215 transporter activity
Lsqua1411	GO:0055114 oxidation-reduction process		GO:0052716 hydroquinone:oxygen oxidoreductase activity | GO:0005507 copper ion binding
Lsqua1412	GO:0055114 oxidation-reduction process		GO:0052716 hydroquinone:oxygen oxidoreductase activity | GO:0005507 copper ion binding
Lsqua1414		GO:0005622 intracellular	GO:0003779 actin binding
Lsqua1415		GO:0005622 intracellular	GO:0003779 actin binding
Lsqua1418	GO:0008152 metabolic process		GO:0016779 nucleotidyltransferase activity
Lsqua1420	GO:0008152 metabolic process		GO:0003992 N2-acetyl-L-ornithine:2-oxoglutarate 5-aminotransferase activity | GO:0030170 pyridoxal phosphate binding
Lsqua1422	GO:0001731 formation of translation preinitiation complex | GO:0006446 regulation of translational initiation	GO:0016282 eukaryotic 43S preinitiation complex | GO:0005852 eukaryotic translation initiation factor 3 complex | GO:0033290 eukaryotic 48S preinitiation complex	GO:0003743 translation initiation factor activity | GO:0000166 nucleotide binding | GO:0016757 transferase activity, transferring glycosyl groups | GO:0031369 translation initiation factor binding
Lsqua1424	GO:0006511 ubiquitin-dependent protein catabolic process | GO:0006810 transport	GO:0016021 integral to membrane
Lsqua1425	GO:0006184 GTP catabolic process | GO:0045901 positive regulation of translational elongation		GO:0003746 translation elongation factor activity | GO:0003924 GTPase activity | GO:0005525 GTP binding
Lsqua1427	GO:0032259 methylation		GO:0008168 methyltransferase activity
Lsqua1429	GO:0031047 gene silencing by RNA	GO:0016442 RNA-induced silencing complex	GO:0016788 hydrolase activity, acting on ester bonds | GO:0003676 nucleic acid binding
Lsqua1430	GO:0006396 RNA processing		GO:0003723 RNA binding | GO:0004525 ribonuclease III activity
Lsqua1431	GO:0006396 RNA processing		GO:0003723 RNA binding | GO:0004525 ribonuclease III activity
Lsqua1435	GO:0005975 carbohydrate metabolic process
Lsqua1439	GO:0006508 proteolysis		GO:0004190 aspartic-type endopeptidase activity
Lsqua1445	GO:0005978 glycogen biosynthetic process	GO:0005737 cytoplasm	GO:0004553 hydrolase activity, hydrolyzing O-glycosyl compounds | GO:0043169 cation binding | GO:0003844 1,4-alpha-glucan branching enzyme activity
Lsqua1446	GO:0008152 metabolic process		GO:0016787 hydrolase activity
Lsqua1449	GO:0042493 response to drug		GO:0008270 zinc ion binding | GO:0003676 nucleic acid binding
Lsqua1450	GO:0018108 peptidyl-tyrosine phosphorylation | GO:0046677 response to antibiotic		GO:0004713 protein tyrosine kinase activity | GO:0005524 ATP binding
Lsqua1451	GO:0018108 peptidyl-tyrosine phosphorylation | GO:0046677 response to antibiotic		GO:0004713 protein tyrosine kinase activity | GO:0005524 ATP binding
Lsqua1452	GO:0015876 acetyl-CoA transport	GO:0016021 integral to membrane	GO:0008521 acetyl-CoA transporter activity
Lsqua1453	GO:0006355 regulation of transcription, DNA-dependent		GO:0003700 sequence-specific DNA binding transcription factor activity | GO:0043565 sequence-specific DNA binding
Lsqua1454		GO:0005634 nucleus
Lsqua1455	GO:0055114 oxidation-reduction process		GO:0016491 oxidoreductase activity
Lsqua1456	GO:0005975 carbohydrate metabolic process	GO:0005576 extracellular region	GO:0004553 hydrolase activity, hydrolyzing O-glycosyl compounds | GO:0030248 cellulose binding
Lsqua1457	GO:0006414 translational elongation | GO:0006184 GTP catabolic process	GO:0005622 intracellular	GO:0003746 translation elongation factor activity | GO:0003924 GTPase activity | GO:0005525 GTP binding
Lsqua1463	GO:0006355 regulation of transcription, DNA-dependent		GO:0003700 sequence-specific DNA binding transcription factor activity | GO:0043565 sequence-specific DNA binding
Lsqua1464	GO:0008152 metabolic process | GO:0015693 magnesium ion transport	GO:0016020 membrane	GO:0015095 magnesium ion transmembrane transporter activity | GO:0003824 catalytic activity
Lsqua1466	GO:0005978 glycogen biosynthetic process		GO:0004553 hydrolase activity, hydrolyzing O-glycosyl compounds | GO:0043169 cation binding | GO:0003844 1,4-alpha-glucan branching enzyme activity
Lsqua1467	GO:0005978 glycogen biosynthetic process	GO:0005737 cytoplasm	GO:0004553 hydrolase activity, hydrolyzing O-glycosyl compounds | GO:0043169 cation binding | GO:0003844 1,4-alpha-glucan branching enzyme activity
Lsqua1470	GO:0006200 ATP catabolic process		GO:0003676 nucleic acid binding | GO:0008026 ATP-dependent helicase activity | GO:0005524 ATP binding
Lsqua1471	GO:0006481 C-terminal protein methylation | GO:0009908 flower development	GO:0016021 integral to membrane | GO:0005783 endoplasmic reticulum	GO:0004671 protein C-terminal S-isoprenylcysteine carboxyl O-methyltransferase activity
Lsqua1474	GO:0055114 oxidation-reduction process		GO:0008678 2-deoxy-D-gluconate 3-dehydrogenase activity
Lsqua1475	GO:0055114 oxidation-reduction process		GO:0016491 oxidoreductase activity
Lsqua1476	GO:0016311 dephosphorylation		GO:0003993 acid phosphatase activity
Lsqua1477	GO:0006412 translation	GO:0015935 small ribosomal subunit | GO:0009536 plastid	GO:0003735 structural constituent of ribosome
Lsqua1478	GO:0006103 2-oxoglutarate metabolic process | GO:0006099 tricarboxylic acid cycle | GO:0000002 mitochondrial genome maintenance	GO:0009353 mitochondrial oxoglutarate dehydrogenase complex | GO:0042645 mitochondrial nucleoid	GO:0004149 dihydrolipoyllysine-residue succinyltransferase activity
Lsqua1480	GO:0008152 metabolic process	GO:0005730 nucleolus	GO:0005525 GTP binding | GO:0016746 transferase activity, transferring acyl groups
Lsqua1481	GO:0008152 metabolic process	GO:0005730 nucleolus	GO:0005525 GTP binding | GO:0016746 transferase activity, transferring acyl groups
Lsqua1483	GO:0032508 DNA duplex unwinding		GO:0005524 ATP binding | GO:0043141 ATP-dependent 5'-3' DNA helicase activity
Lsqua1484	GO:0055114 oxidation-reduction process | GO:0006508 proteolysis | GO:0006222 UMP biosynthetic process		GO:0004152 dihydroorotate dehydrogenase activity | GO:0004177 aminopeptidase activity
Lsqua1485	GO:0016192 vesicle-mediated transport | GO:0006886 intracellular protein transport	GO:0005794 Golgi apparatus | GO:0030117 membrane coat	GO:0008565 protein transporter activity
Lsqua1491	GO:0006184 GTP catabolic process		GO:0003924 GTPase activity | GO:0005525 GTP binding
Lsqua1492	GO:0006825 copper ion transport	GO:0005758 mitochondrial intermembrane space	GO:0016531 copper chaperone activity
Lsqua1493	GO:0008152 metabolic process		GO:0004416 hydroxyacylglutathione hydrolase activity
Lsqua1494	GO:0055114 oxidation-reduction process | GO:0000103 sulfate assimilation | GO:0031505 fungal-type cell wall organization | GO:0008652 cellular amino acid biosynthetic process	GO:0009337 sulfite reductase complex (NADPH)	GO:0004783 sulfite reductase (NADPH) activity | GO:0051539 4 iron, 4 sulfur cluster binding | GO:0020037 heme binding | GO:0050661 NADP binding | GO:0010181 FMN binding | GO:0005506 iron ion binding
Lsqua1495	GO:0055114 oxidation-reduction process		GO:0020037 heme binding | GO:0016705 oxidoreductase activity, acting on paired donors, with incorporation or reduction of molecular oxygen | GO:0004497 monooxygenase activity | GO:0005506 iron ion binding
Lsqua1496	GO:0008152 metabolic process		GO:0016810 hydrolase activity, acting on carbon-nitrogen (but not peptide) bonds
Lsqua1497	GO:0008152 metabolic process		GO:0016829 lyase activity
Lsqua1498	GO:0055114 oxidation-reduction process | GO:0006979 response to oxidative stress		GO:0020037 heme binding | GO:0016705 oxidoreductase activity, acting on paired donors, with incorporation or reduction of molecular oxygen | GO:0004497 monooxygenase activity | GO:0005506 iron ion binding | GO:0004601 peroxidase activity
Lsqua1500	GO:0048034 heme O biosynthetic process	GO:0016021 integral to membrane | GO:0031966 mitochondrial membrane	GO:0008495 protoheme IX farnesyltransferase activity
Lsqua1501	GO:0006298 mismatch repair		GO:0005524 ATP binding | GO:0003684 damaged DNA binding | GO:0008270 zinc ion binding | GO:0030983 mismatched DNA binding
Lsqua1502	GO:0008608 attachment of spindle microtubules to kinetochore | GO:0000070 mitotic sister chromatid segregation | GO:0051983 regulation of chromosome segregation | GO:0071173 spindle assembly checkpoint	GO:0000776 kinetochore | GO:0005634 nucleus
Lsqua1503	GO:0006468 protein phosphorylation		GO:0005524 ATP binding | GO:0004674 protein serine/threonine kinase activity
Lsqua1507	GO:0055085 transmembrane transport | GO:0006200 ATP catabolic process	GO:0016021 integral to membrane	GO:0042626 ATPase activity, coupled to transmembrane movement of substances | GO:0005524 ATP binding
Lsqua1509	GO:0019430 removal of superoxide radicals | GO:0055114 oxidation-reduction process	GO:0005737 cytoplasm	GO:0050660 flavin adenine dinucleotide binding | GO:0004791 thioredoxin-disulfide reductase activity
Lsqua1510	GO:0055085 transmembrane transport	GO:0016020 membrane
Lsqua1511	GO:0009058 biosynthetic process		GO:0016740 transferase activity | GO:0030170 pyridoxal phosphate binding
Lsqua1512	GO:0006418 tRNA aminoacylation for protein translation	GO:0005737 cytoplasm	GO:0005524 ATP binding | GO:0004812 aminoacyl-tRNA ligase activity
Lsqua1514	GO:0045454 cell redox homeostasis | GO:0006468 protein phosphorylation | GO:0055114 oxidation-reduction process		GO:0009055 electron carrier activity | GO:0005524 ATP binding | GO:0015035 protein disulfide oxidoreductase activity | GO:0004674 protein serine/threonine kinase activity
Lsqua1515	GO:0030261 chromosome condensation | GO:0006334 nucleosome assembly	GO:0000786 nucleosome | GO:0005634 nucleus	GO:0003677 DNA binding
Lsqua1516		GO:0005634 nucleus | GO:0005737 cytoplasm
Lsqua1517	GO:0006623 protein targeting to vacuole | GO:0060988 lipid tube assembly | GO:0006184 GTP catabolic process | GO:0030036 actin cytoskeleton organization | GO:0016559 peroxisome fission | GO:0006897 endocytosis | GO:0045053 protein retention in Golgi apparatus	GO:0005777 peroxisome | GO:0005741 mitochondrial outer membrane	GO:0005525 GTP binding | GO:0003924 GTPase activity
Lsqua1522	GO:0023014 signal transduction via phosphorylation event | GO:0035556 intracellular signal transduction | GO:0000160 two-component signal transduction system (phosphorelay)	GO:0016021 integral to membrane	GO:0000155 two-component sensor activity | GO:0005524 ATP binding | GO:0000156 two-component response regulator activity
Lsqua1523	GO:0006078 (1->6)-beta-D-glucan biosynthetic process | GO:0006011 UDP-glucose metabolic process | GO:0005992 trehalose biosynthetic process | GO:0005978 glycogen biosynthetic process	GO:0005737 cytoplasm	GO:0003983 UTP:glucose-1-phosphate uridylyltransferase activity
Lsqua1525	GO:0006094 gluconeogenesis		GO:0004736 pyruvate carboxylase activity | GO:0046872 metal ion binding | GO:0003677 DNA binding | GO:0005524 ATP binding | GO:0004075 biotin carboxylase activity
Lsqua1527	GO:0015074 DNA integration	GO:0005739 mitochondrion	GO:0003676 nucleic acid binding | GO:0008270 zinc ion binding
Lsqua1529	GO:0018298 protein-chromophore linkage | GO:0006508 proteolysis | GO:0006396 RNA processing		GO:0003723 RNA binding | GO:0004525 ribonuclease III activity | GO:0008236 serine-type peptidase activity
Lsqua1530	GO:0048015 phosphatidylinositol-mediated signaling | GO:0046854 phosphatidylinositol phosphorylation | GO:0009102 biotin biosynthetic process		GO:0004015 adenosylmethionine-8-amino-7-oxononanoate transaminase activity | GO:0004141 dethiobiotin synthase activity | GO:0016303 1-phosphatidylinositol-3-kinase activity | GO:0005524 ATP binding | GO:0000287 magnesium ion binding | GO:0030170 pyridoxal phosphate binding
Lsqua1531	GO:0006812 cation transport | GO:0055085 transmembrane transport	GO:0016021 integral to membrane	GO:0008324 cation transmembrane transporter activity
Lsqua1535	GO:0008152 metabolic process | GO:0046677 response to antibiotic		GO:0005524 ATP binding | GO:0016773 phosphotransferase activity, alcohol group as acceptor
Lsqua1536	GO:0016570 histone modification | GO:0006352 transcription initiation, DNA-dependent	GO:0005634 nucleus	GO:0003677 DNA binding
Lsqua1538	GO:0000724 double-strand break repair via homologous recombination		GO:0003697 single-stranded DNA binding
Lsqua1539	GO:0006468 protein phosphorylation		GO:0005524 ATP binding | GO:0004674 protein serine/threonine kinase activity
Lsqua1541	GO:0009414 response to water deprivation | GO:0009409 response to cold	GO:0005730 nucleolus	GO:0003676 nucleic acid binding | GO:0008270 zinc ion binding | GO:0000166 nucleotide binding
Lsqua1542	GO:0007264 small GTPase mediated signal transduction | GO:0015031 protein transport		GO:0005525 GTP binding
Lsqua1543	GO:0008152 metabolic process		GO:0016740 transferase activity
Lsqua1549	GO:0008152 metabolic process		GO:0008080 N-acetyltransferase activity
Lsqua1551	GO:0016192 vesicle-mediated transport | GO:0006886 intracellular protein transport	GO:0016020 membrane	GO:0005484 SNAP receptor activity
Lsqua1553	GO:0008152 metabolic process		GO:0016787 hydrolase activity
Lsqua1554	GO:0006398 histone mRNA 3'-end processing
Lsqua1555	GO:0046355 mannan catabolic process		GO:0004567 beta-mannosidase activity
Lsqua1556	GO:0005975 carbohydrate metabolic process | GO:0006032 chitin catabolic process		GO:0004568 chitinase activity
Lsqua1557	GO:0005975 carbohydrate metabolic process | GO:0006032 chitin catabolic process		GO:0004568 chitinase activity
Lsqua1558	GO:0006446 regulation of translational initiation | GO:0001731 formation of translation preinitiation complex	GO:0005852 eukaryotic translation initiation factor 3 complex | GO:0016282 eukaryotic 43S preinitiation complex | GO:0033290 eukaryotic 48S preinitiation complex	GO:0003743 translation initiation factor activity
Lsqua1559	GO:0035725 sodium ion transmembrane transport | GO:0071805 potassium ion transmembrane transport | GO:0007035 vacuolar acidification	GO:0016021 integral to membrane | GO:0000329 fungal-type vacuole membrane | GO:0005770 late endosome	GO:0015385 sodium:hydrogen antiporter activity | GO:0015386 potassium:hydrogen antiporter activity
Lsqua1560	GO:0006633 fatty acid biosynthetic process | GO:0055114 oxidation-reduction process	GO:0016021 integral to membrane	GO:0016491 oxidoreductase activity | GO:0005506 iron ion binding
Lsqua1561		GO:0000502 proteasome complex
Lsqua1562	GO:0022900 electron transport chain | GO:0006099 tricarboxylic acid cycle		GO:0050660 flavin adenine dinucleotide binding | GO:0016627 oxidoreductase activity, acting on the CH-CH group of donors
Lsqua1564	GO:0038032 termination of G-protein coupled receptor signaling pathway | GO:0035556 intracellular signal transduction
Lsqua1565		GO:0000502 proteasome complex
Lsqua1566	GO:0006468 protein phosphorylation | GO:0007264 small GTPase mediated signal transduction		GO:0005525 GTP binding | GO:0004672 protein kinase activity | GO:0005524 ATP binding
Lsqua1567	GO:0008152 metabolic process | GO:0007264 small GTPase mediated signal transduction		GO:0005525 GTP binding | GO:0016787 hydrolase activity
Lsqua1569	GO:0055085 transmembrane transport | GO:0008643 carbohydrate transport	GO:0016021 integral to membrane	GO:0022857 transmembrane transporter activity
Lsqua1570	GO:0001958 endochondral ossification | GO:0051216 cartilage development	GO:0005689 U12-type spliceosomal complex | GO:0005938 cell cortex | GO:0005578 proteinaceous extracellular matrix | GO:0005581 collagen	GO:0003676 nucleic acid binding | GO:0005201 extracellular matrix structural constituent | GO:0000166 nucleotide binding
Lsqua1571	GO:0016236 macroautophagy | GO:0071562 nucleus-vacuole junction assembly | GO:0000011 vacuole inheritance | GO:0042144 vacuole fusion, non-autophagic | GO:0071255 CVT vesicle assembly	GO:0000329 fungal-type vacuole membrane | GO:0071561 nucleus-vacuole junction | GO:0071563 Myo2p-Vac17p-Vac8p transport complex	GO:0043495 protein anchor
Lsqua1572	GO:0035434 copper ion transmembrane transport | GO:0008152 metabolic process	GO:0016021 integral to membrane	GO:0005507 copper ion binding | GO:0043682 copper-transporting ATPase activity | GO:0005524 ATP binding
Lsqua1579	GO:0006457 protein folding | GO:0006950 response to stress | GO:0009116 nucleoside metabolic process		GO:0004731 purine-nucleoside phosphorylase activity | GO:0005524 ATP binding | GO:0051082 unfolded protein binding
Lsqua1581	GO:0006412 translation	GO:0015935 small ribosomal subunit	GO:0003735 structural constituent of ribosome | GO:0003723 RNA binding
Lsqua1582	GO:0006412 translation	GO:0005840 ribosome	GO:0003735 structural constituent of ribosome
Lsqua1583	GO:0006412 translation	GO:0005840 ribosome	GO:0003735 structural constituent of ribosome
Lsqua1586		GO:0016021 integral to membrane
Lsqua1587	GO:0051301 cell division
Lsqua1589	GO:0008152 metabolic process		GO:0016874 ligase activity
Lsqua1590	GO:0007018 microtubule-based movement | GO:0008152 metabolic process	GO:0005871 kinesin complex | GO:0005874 microtubule	GO:0008017 microtubule binding | GO:0005524 ATP binding | GO:0003777 microtubule motor activity
Lsqua1591	GO:0043087 regulation of GTPase activity | GO:0051056 regulation of small GTPase mediated signal transduction	GO:0005622 intracellular	GO:0005085 guanyl-nucleotide exchange factor activity | GO:0005525 GTP binding
Lsqua1593	GO:0043087 regulation of GTPase activity | GO:0006414 translational elongation	GO:0005853 eukaryotic translation elongation factor 1 complex	GO:0003746 translation elongation factor activity | GO:0005085 guanyl-nucleotide exchange factor activity
Lsqua1594	GO:0019285 glycine betaine biosynthetic process from choline | GO:0055114 oxidation-reduction process	GO:0005634 nucleus | GO:0005829 cytosol | GO:0005739 mitochondrion	GO:0004043 L-aminoadipate-semialdehyde dehydrogenase activity | GO:0016787 hydrolase activity | GO:0008802 betaine-aldehyde dehydrogenase activity
Lsqua1597	GO:0006950 response to stress	GO:0016021 integral to membrane | GO:0005886 plasma membrane
Lsqua1598	GO:0006457 protein folding | GO:0035335 peptidyl-tyrosine dephosphorylation | GO:0009408 response to heat		GO:0004725 protein tyrosine phosphatase activity | GO:0046872 metal ion binding | GO:0031072 heat shock protein binding | GO:0005524 ATP binding | GO:0051082 unfolded protein binding
Lsqua1599	GO:0016310 phosphorylation		GO:0016301 kinase activity | GO:0030554 adenyl nucleotide binding
Lsqua1600	GO:0044237 cellular metabolic process		GO:0050662 coenzyme binding | GO:0003824 catalytic activity
Lsqua1601	GO:0007264 small GTPase mediated signal transduction | GO:0006184 GTP catabolic process | GO:0015031 protein transport	GO:0016020 membrane	GO:0005525 GTP binding
Lsqua1604	GO:0016192 vesicle-mediated transport | GO:0006886 intracellular protein transport	GO:0005794 Golgi apparatus | GO:0030131 clathrin adaptor complex	GO:0008565 protein transporter activity
Lsqua1605	GO:0042176 regulation of protein catabolic process | GO:0050790 regulation of catalytic activity	GO:0000502 proteasome complex	GO:0030234 enzyme regulator activity
Lsqua1606	GO:0042176 regulation of protein catabolic process | GO:0050790 regulation of catalytic activity	GO:0000502 proteasome complex	GO:0030234 enzyme regulator activity
Lsqua1607	GO:0006099 tricarboxylic acid cycle		GO:0004591 oxoglutarate dehydrogenase (succinyl-transferring) activity | GO:0030976 thiamine pyrophosphate binding
Lsqua1610	GO:0008152 metabolic process		GO:0030170 pyridoxal phosphate binding | GO:0003824 catalytic activity
Lsqua1611	GO:0006412 translation	GO:0005840 ribosome	GO:0046872 metal ion binding | GO:0003735 structural constituent of ribosome | GO:0019843 rRNA binding
Lsqua1612		GO:0005634 nucleus	GO:0017025 TBP-class protein binding
Lsqua1617	GO:0006096 glycolysis		GO:0004332 fructose-bisphosphate aldolase activity | GO:0008270 zinc ion binding
Lsqua1618		GO:0016021 integral to membrane
Lsqua1619	GO:0051131 chaperone-mediated protein complex assembly | GO:0070407 oxidation-dependent protein catabolic process | GO:0006515 misfolded or incompletely synthesized protein catabolic process | GO:0090296 regulation of mitochondrial DNA replication | GO:0006200 ATP catabolic process | GO:0034599 cellular response to oxidative stress	GO:0005759 mitochondrial matrix	GO:0004252 serine-type endopeptidase activity | GO:0004176 ATP-dependent peptidase activity | GO:0043565 sequence-specific DNA binding | GO:0005524 ATP binding
Lsqua1620			GO:0008270 zinc ion binding | GO:0003676 nucleic acid binding
Lsqua1625	GO:0006457 protein folding	GO:0005737 cytoplasm	GO:0005524 ATP binding | GO:0051082 unfolded protein binding
Lsqua1626	GO:0006468 protein phosphorylation | GO:0007165 signal transduction | GO:0048593 camera-type eye morphogenesis | GO:0007634 optokinetic behavior		GO:0004674 protein serine/threonine kinase activity | GO:0004871 signal transducer activity | GO:0005524 ATP binding
Lsqua1627	GO:0006432 phenylalanyl-tRNA aminoacylation	GO:0005737 cytoplasm	GO:0003723 RNA binding | GO:0005524 ATP binding | GO:0004826 phenylalanine-tRNA ligase activity | GO:0000287 magnesium ion binding
Lsqua1628	GO:0006432 phenylalanyl-tRNA aminoacylation	GO:0009328 phenylalanine-tRNA ligase complex	GO:0005524 ATP binding | GO:0004826 phenylalanine-tRNA ligase activity | GO:0000049 tRNA binding
Lsqua1629			GO:0046872 metal ion binding
Lsqua1630	GO:0006200 ATP catabolic process | GO:0008380 RNA splicing | GO:0006397 mRNA processing	GO:0005737 cytoplasm | GO:0005634 nucleus	GO:0003676 nucleic acid binding | GO:0008026 ATP-dependent helicase activity | GO:0005524 ATP binding
Lsqua1631	GO:0006424 glutamyl-tRNA aminoacylation	GO:0017102 methionyl glutamyl tRNA synthetase complex | GO:0005739 mitochondrion	GO:0005524 ATP binding | GO:0004818 glutamate-tRNA ligase activity
Lsqua1632	GO:0008152 metabolic process		GO:0016884 carbon-nitrogen ligase activity, with glutamine as amido-N-donor | GO:0016811 hydrolase activity, acting on carbon-nitrogen (but not peptide) bonds, in linear amides
Lsqua1633	GO:0006508 proteolysis		GO:0004185 serine-type carboxypeptidase activity
Lsqua1634	GO:0023014 signal transduction via phosphorylation event | GO:0006468 protein phosphorylation | GO:0000160 two-component signal transduction system (phosphorelay) | GO:0006200 ATP catabolic process | GO:0035556 intracellular signal transduction	GO:0016020 membrane	GO:0008026 ATP-dependent helicase activity | GO:0000155 two-component sensor activity | GO:0003676 nucleic acid binding | GO:0000156 two-component response regulator activity | GO:0005524 ATP binding
Lsqua1638	GO:0007264 small GTPase mediated signal transduction	GO:0005622 intracellular | GO:0016020 membrane	GO:0005525 GTP binding
Lsqua1639	GO:0046355 mannan catabolic process | GO:0005977 glycogen metabolic process	GO:0005576 extracellular region	GO:0016985 mannan endo-1,4-beta-mannosidase activity | GO:0043169 cation binding | GO:0030248 cellulose binding | GO:0019156 isoamylase activity
Lsqua1640	GO:0006412 translation	GO:0005840 ribosome	GO:0003735 structural constituent of ribosome
Lsqua1643	GO:0006357 regulation of transcription from RNA polymerase II promoter	GO:0005634 nucleus	GO:0008270 zinc ion binding | GO:0000981 sequence-specific DNA binding RNA polymerase II transcription factor activity | GO:0003677 DNA binding
Lsqua1645	GO:0006457 protein folding | GO:0046907 intracellular transport | GO:0000413 protein peptidyl-prolyl isomerization	GO:0005788 endoplasmic reticulum lumen | GO:0005794 Golgi apparatus | GO:0009506 plasmodesma | GO:0005886 plasma membrane | GO:0005576 extracellular region | GO:0009507 chloroplast | GO:0005829 cytosol	GO:0016874 ligase activity | GO:0042277 peptide binding | GO:0008270 zinc ion binding | GO:0003755 peptidyl-prolyl cis-trans isomerase activity
Lsqua1646	GO:0055114 oxidation-reduction process		GO:0051287 NAD binding | GO:0016651 oxidoreductase activity, acting on NADH or NADPH | GO:0048038 quinone binding
Lsqua1647	GO:0030163 protein catabolic process	GO:0005737 cytoplasm | GO:0000502 proteasome complex	GO:0005524 ATP binding | GO:0017111 nucleoside-triphosphatase activity
Lsqua1648	GO:0051205 protein insertion into membrane	GO:0016021 integral to membrane
Lsqua1650	GO:0006886 intracellular protein transport	GO:0005634 nucleus	GO:0008536 Ran GTPase binding
Lsqua1651	GO:0006629 lipid metabolic process		GO:0004806 triglyceride lipase activity
Lsqua1653	GO:0006089 lactate metabolic process | GO:0055114 oxidation-reduction process	GO:0005758 mitochondrial intermembrane space	GO:0046872 metal ion binding | GO:0004460 L-lactate dehydrogenase (cytochrome) activity | GO:0010181 FMN binding | GO:0020037 heme binding
Lsqua1657	GO:0016310 phosphorylation		GO:0016301 kinase activity
Lsqua1658			GO:0008270 zinc ion binding
Lsqua1661	GO:0006631 fatty acid metabolic process | GO:0055085 transmembrane transport	GO:0016021 integral to membrane
Lsqua1662	GO:0006556 S-adenosylmethionine biosynthetic process | GO:0006730 one-carbon metabolic process | GO:0015948 methanogenesis	GO:0009986 cell surface | GO:0030446 hyphal cell wall | GO:0005886 plasma membrane	GO:0004478 methionine adenosyltransferase activity | GO:0046872 metal ion binding | GO:0005524 ATP binding
Lsqua1663	GO:0055114 oxidation-reduction process		GO:0020037 heme binding | GO:0016705 oxidoreductase activity, acting on paired donors, with incorporation or reduction of molecular oxygen | GO:0004497 monooxygenase activity | GO:0005506 iron ion binding
Lsqua1664		GO:0005622 intracellular	GO:0003676 nucleic acid binding | GO:0000166 nucleotide binding
Lsqua1665	GO:0008380 RNA splicing | GO:0006397 mRNA processing	GO:0005737 cytoplasm | GO:0005681 spliceosomal complex	GO:0003723 RNA binding
Lsqua1666	GO:0006184 GTP catabolic process | GO:0007186 G-protein coupled receptor signaling pathway		GO:0004871 signal transducer activity | GO:0031683 G-protein beta/gamma-subunit complex binding | GO:0003924 GTPase activity | GO:0005525 GTP binding
Lsqua1667	GO:0055114 oxidation-reduction process		GO:0051920 peroxiredoxin activity | GO:0004601 peroxidase activity
Lsqua1669	GO:0032259 methylation		GO:0008168 methyltransferase activity
Lsqua1670	GO:0009086 methionine biosynthetic process | GO:0032259 methylation	GO:0005737 cytoplasm	GO:0008270 zinc ion binding | GO:0003871 5-methyltetrahydropteroyltriglutamate-homocysteine S-methyltransferase activity
Lsqua1671	GO:0042823 pyridoxal phosphate biosynthetic process | GO:0055114 oxidation-reduction process		GO:0004733 pyridoxamine-phosphate oxidase activity | GO:0010181 FMN binding
Lsqua1673	GO:0006351 transcription, DNA-dependent		GO:0003899 DNA-directed RNA polymerase activity | GO:0000166 nucleotide binding
Lsqua1674	GO:0006200 ATP catabolic process		GO:0003676 nucleic acid binding | GO:0008026 ATP-dependent helicase activity | GO:0005524 ATP binding
Lsqua1675	GO:0007264 small GTPase mediated signal transduction | GO:0015031 protein transport		GO:0005525 GTP binding
Lsqua1676	GO:0032065 cortical protein anchoring	GO:0005938 cell cortex	GO:0005543 phospholipid binding
Lsqua1678	GO:0008152 metabolic process		GO:0004386 helicase activity | GO:0003677 DNA binding | GO:0005524 ATP binding | GO:0008270 zinc ion binding
Lsqua1681	GO:0006414 translational elongation	GO:0005840 ribosome	GO:0003735 structural constituent of ribosome
Lsqua1685	GO:0043087 regulation of GTPase activity | GO:0051301 cell division | GO:0051056 regulation of small GTPase mediated signal transduction	GO:0005622 intracellular	GO:0005085 guanyl-nucleotide exchange factor activity
Lsqua1686		GO:0005622 intracellular	GO:0003779 actin binding
Lsqua1687	GO:0006810 transport	GO:0002102 podosome | GO:0000139 Golgi membrane | GO:0030665 clathrin coated vesicle membrane | GO:0030027 lamellipodium | GO:0030054 cell junction | GO:0005886 plasma membrane | GO:0001726 ruffle | GO:0005938 cell cortex | GO:0005829 cytosol | GO:0045202 synapse	GO:0003779 actin binding
Lsqua1688	GO:0006508 proteolysis	GO:0005759 mitochondrial matrix	GO:0046872 metal ion binding | GO:0004222 metalloendopeptidase activity
Lsqua1689			GO:0003723 RNA binding
Lsqua1690	GO:0009088 threonine biosynthetic process | GO:0009086 methionine biosynthetic process | GO:0055114 oxidation-reduction process | GO:0009089 lysine biosynthetic process via diaminopimelate | GO:0009097 isoleucine biosynthetic process | GO:0006531 aspartate metabolic process	GO:0005737 cytoplasm	GO:0051287 NAD binding | GO:0004073 aspartate-semialdehyde dehydrogenase activity | GO:0003942 N-acetyl-gamma-glutamyl-phosphate reductase activity | GO:0046983 protein dimerization activity | GO:0050661 NADP binding
Lsqua1693	GO:0008152 metabolic process		GO:0016787 hydrolase activity
Lsqua1694	GO:0006355 regulation of transcription, DNA-dependent	GO:0005634 nucleus
Lsqua1695	GO:0030833 regulation of actin filament polymerization	GO:0005856 cytoskeleton	GO:0003779 actin binding
Lsqua1696	GO:0030163 protein catabolic process | GO:0006508 proteolysis | GO:0051301 cell division	GO:0005737 cytoplasm | GO:0000502 proteasome complex	GO:0008233 peptidase activity | GO:0005524 ATP binding | GO:0017111 nucleoside-triphosphatase activity
Lsqua1697	GO:0008152 metabolic process		GO:0016740 transferase activity
Lsqua1702	GO:0016311 dephosphorylation		GO:0004721 phosphoprotein phosphatase activity
Lsqua1703	GO:0016311 dephosphorylation		GO:0004721 phosphoprotein phosphatase activity
Lsqua1705	GO:0006260 DNA replication	GO:0005634 nucleus	GO:0043565 sequence-specific DNA binding | GO:0046982 protein heterodimerization activity
Lsqua1708	GO:0055114 oxidation-reduction process	GO:0005886 plasma membrane	GO:0008137 NADH dehydrogenase (ubiquinone) activity
Lsqua1710	GO:0006468 protein phosphorylation | GO:0051301 cell division		GO:0003677 DNA binding | GO:0005524 ATP binding | GO:0004674 protein serine/threonine kinase activity
Lsqua1711		GO:0016021 integral to membrane
Lsqua1712			GO:0003676 nucleic acid binding | GO:0000166 nucleotide binding
Lsqua1713	GO:0003333 amino acid transmembrane transport | GO:0006184 GTP catabolic process	GO:0016021 integral to membrane	GO:0015171 amino acid transmembrane transporter activity | GO:0003924 GTPase activity | GO:0005525 GTP binding
Lsqua1714	GO:0006412 translation	GO:0005840 ribosome	GO:0046872 metal ion binding | GO:0003735 structural constituent of ribosome
Lsqua1716	GO:0045454 cell redox homeostasis | GO:0006662 glycerol ether metabolic process | GO:0055114 oxidation-reduction process	GO:0005783 endoplasmic reticulum	GO:0016853 isomerase activity | GO:0015035 protein disulfide oxidoreductase activity
Lsqua1718	GO:0006397 mRNA processing | GO:0055114 oxidation-reduction process		GO:0016491 oxidoreductase activity | GO:0008270 zinc ion binding
Lsqua1719	GO:0009450 gamma-aminobutyric acid catabolic process | GO:0055114 oxidation-reduction process		GO:0009013 succinate-semialdehyde dehydrogenase [NAD(P)+] activity
Lsqua1720		GO:0016020 membrane
Lsqua1721		GO:0016020 membrane
Lsqua1722	GO:0051258 protein polymerization | GO:0006184 GTP catabolic process | GO:0007017 microtubule-based process	GO:0005874 microtubule | GO:0005737 cytoplasm	GO:0003924 GTPase activity | GO:0005200 structural constituent of cytoskeleton | GO:0005525 GTP binding
Lsqua1723	GO:0007017 microtubule-based process | GO:0006184 GTP catabolic process | GO:0051258 protein polymerization | GO:0046686 response to cadmium ion	GO:0005774 vacuolar membrane | GO:0009507 chloroplast | GO:0005794 Golgi apparatus | GO:0005874 microtubule | GO:0009506 plasmodesma | GO:0005886 plasma membrane	GO:0005525 GTP binding | GO:0003924 GTPase activity | GO:0005200 structural constituent of cytoskeleton
Lsqua1726	GO:0006508 proteolysis		GO:0004252 serine-type endopeptidase activity
Lsqua1729	GO:0006301 postreplication repair | GO:0007062 sister chromatid cohesion	GO:0009941 chloroplast envelope | GO:0043601 nuclear replisome
Lsqua1732	GO:0007186 G-protein coupled receptor signaling pathway	GO:0016021 integral to membrane	GO:0004934 mating-type alpha-factor pheromone receptor activity
Lsqua1733	GO:2000728 regulation of mRNA export from nucleus in response to heat stress | GO:0031081 nuclear pore distribution | GO:0000973 posttranscriptional tethering of RNA polymerase II gene DNA at nuclear periphery | GO:0016973 poly(A)+ mRNA export from nucleus	GO:0005643 nuclear pore | GO:0005737 cytoplasm
Lsqua1734	GO:0006694 steroid biosynthetic process | GO:0044237 cellular metabolic process | GO:0055114 oxidation-reduction process		GO:0003854 3-beta-hydroxy-delta5-steroid dehydrogenase activity | GO:0050662 coenzyme binding | GO:0016853 isomerase activity | GO:0000166 nucleotide binding
Lsqua1735	GO:0009086 methionine biosynthetic process	GO:0005737 cytoplasm	GO:0004414 homoserine O-acetyltransferase activity
Lsqua1736	GO:0043581 mycelium development | GO:0009058 biosynthetic process | GO:0055114 oxidation-reduction process		GO:0016779 nucleotidyltransferase activity | GO:0016491 oxidoreductase activity | GO:0010181 FMN binding
Lsqua1737	GO:0006082 organic acid metabolic process | GO:0016310 phosphorylation	GO:0005622 intracellular	GO:0008776 acetate kinase activity | GO:0000287 magnesium ion binding
Lsqua1738	GO:0055114 oxidation-reduction process	GO:0070469 respiratory chain | GO:0005886 plasma membrane | GO:0005739 mitochondrion	GO:0046872 metal ion binding | GO:0008121 ubiquinol-cytochrome-c reductase activity | GO:0051537 2 iron, 2 sulfur cluster binding
Lsqua1739		GO:0005840 ribosome	GO:0008270 zinc ion binding
Lsqua1740	GO:0006508 proteolysis		GO:0004190 aspartic-type endopeptidase activity
Lsqua1743	GO:0006357 regulation of transcription from RNA polymerase II promoter	GO:0016592 mediator complex	GO:0001104 RNA polymerase II transcription cofactor activity
Lsqua1746	GO:0046854 phosphatidylinositol phosphorylation
Lsqua1747	GO:0008202 steroid metabolic process | GO:0055114 oxidation-reduction process		GO:0020037 heme binding | GO:0016705 oxidoreductase activity, acting on paired donors, with incorporation or reduction of molecular oxygen | GO:0004497 monooxygenase activity | GO:0005506 iron ion binding | GO:0009055 electron carrier activity
Lsqua1750	GO:0015986 ATP synthesis coupled proton transport | GO:0006200 ATP catabolic process	GO:0005756 mitochondrial proton-transporting ATP synthase, central stalk	GO:0046961 proton-transporting ATPase activity, rotational mechanism | GO:0046933 hydrogen ion transporting ATP synthase activity, rotational mechanism
Lsqua1751	GO:0006750 glutathione biosynthetic process		GO:0004357 glutamate-cysteine ligase activity
Lsqua1752	GO:0006750 glutathione biosynthetic process		GO:0004357 glutamate-cysteine ligase activity
Lsqua1753	GO:0006730 one-carbon metabolic process		GO:0004013 adenosylhomocysteinase activity
Lsqua1754	GO:0009086 methionine biosynthetic process | GO:0000103 sulfate assimilation | GO:0016310 phosphorylation | GO:0070814 hydrogen sulfide biosynthetic process | GO:0019344 cysteine biosynthetic process	GO:0005737 cytoplasm	GO:0004020 adenylylsulfate kinase activity | GO:0004781 sulfate adenylyltransferase (ATP) activity | GO:0005524 ATP binding
Lsqua1756	GO:0045454 cell redox homeostasis | GO:0043581 mycelium development
Lsqua1758	GO:0043581 mycelium development | GO:0006412 translation	GO:0022627 cytosolic small ribosomal subunit	GO:0003735 structural constituent of ribosome
Lsqua1759	GO:0006470 protein dephosphorylation		GO:0046872 metal ion binding | GO:0004722 protein serine/threonine phosphatase activity
Lsqua1760	GO:0016998 cell wall macromolecule catabolic process
Lsqua1762	GO:0046939 nucleotide phosphorylation	GO:0005739 mitochondrion	GO:0046872 metal ion binding | GO:0004017 adenylate kinase activity | GO:0005524 ATP binding
Lsqua1763	GO:0006289 nucleotide-excision repair	GO:0005634 nucleus	GO:0008270 zinc ion binding
Lsqua1764	GO:0006631 fatty acid metabolic process	GO:0005829 cytosol	GO:0030729 acetoacetate-CoA ligase activity | GO:0005524 ATP binding
Lsqua1768	GO:0043581 mycelium development	GO:0005840 ribosome
Lsqua1769	GO:0006413 translational initiation | GO:0006200 ATP catabolic process	GO:0005737 cytoplasm	GO:0003743 translation initiation factor activity | GO:0008026 ATP-dependent helicase activity | GO:0005524 ATP binding
Lsqua1771	GO:0006735 NADH regeneration | GO:0042183 formate catabolic process | GO:0030416 methylamine metabolic process | GO:0042426 choline catabolic process | GO:0015946 methanol oxidation	GO:0005829 cytosol	GO:0016616 oxidoreductase activity, acting on the CH-OH group of donors, NAD or NADP as acceptor | GO:0070403 NAD+ binding | GO:0005524 ATP binding | GO:0008863 formate dehydrogenase (NAD+) activity | GO:0042803 protein homodimerization activity
Lsqua1774	GO:0009734 auxin mediated signaling pathway | GO:0006355 regulation of transcription, DNA-dependent | GO:0006487 protein N-linked glycosylation	GO:0016020 membrane | GO:0005634 nucleus	GO:0046983 protein dimerization activity | GO:0003830 beta-1,4-mannosylglycoprotein 4-beta-N-acetylglucosaminyltransferase activity
Lsqua1775	GO:0006414 translational elongation | GO:0006184 GTP catabolic process		GO:0003746 translation elongation factor activity | GO:0003924 GTPase activity | GO:0005525 GTP binding
Lsqua1776	GO:0000160 two-component signal transduction system (phosphorelay) | GO:0035556 intracellular signal transduction | GO:0006355 regulation of transcription, DNA-dependent | GO:0006950 response to stress	GO:0005634 nucleus	GO:0000156 two-component response regulator activity | GO:0043565 sequence-specific DNA binding | GO:0003700 sequence-specific DNA binding transcription factor activity
Lsqua1777	GO:0005975 carbohydrate metabolic process | GO:0006665 sphingolipid metabolic process		GO:0046557 glucan endo-1,6-beta-glucosidase activity | GO:0004348 glucosylceramidase activity
Lsqua1778		GO:0005802 trans-Golgi network | GO:0005794 Golgi apparatus
Lsqua1781		GO:0005840 ribosome
Lsqua1782	GO:0006357 regulation of transcription from RNA polymerase II promoter	GO:0005634 nucleus	GO:0008270 zinc ion binding | GO:0000981 sequence-specific DNA binding RNA polymerase II transcription factor activity | GO:0003677 DNA binding
Lsqua1783	GO:0055114 oxidation-reduction process		GO:0016491 oxidoreductase activity
Lsqua1784	GO:0006807 nitrogen compound metabolic process	GO:0005951 carbamoyl-phosphate synthase complex	GO:0046872 metal ion binding | GO:0005524 ATP binding | GO:0004088 carbamoyl-phosphate synthase (glutamine-hydrolyzing) activity
Lsqua1785	GO:0008152 metabolic process		GO:0016787 hydrolase activity
Lsqua1786	GO:0006096 glycolysis | GO:0055114 oxidation-reduction process	GO:0043231 intracellular membrane-bounded organelle	GO:0004739 pyruvate dehydrogenase (acetyl-transferring) activity
Lsqua1787	GO:0009651 response to salt stress	GO:0009506 plasmodesma | GO:0005794 Golgi apparatus | GO:0022626 cytosolic ribosome
Lsqua1790	GO:0055114 oxidation-reduction process		GO:0016491 oxidoreductase activity
Lsqua1791			GO:0008270 zinc ion binding | GO:0003676 nucleic acid binding | GO:0000166 nucleotide binding
Lsqua1792	GO:0006396 RNA processing	GO:0005737 cytoplasm | GO:0005634 nucleus	GO:0003723 RNA binding | GO:0000166 nucleotide binding
Lsqua1793	GO:0030837 negative regulation of actin filament polymerization | GO:0016310 phosphorylation	GO:0005622 intracellular	GO:0016301 kinase activity | GO:0003779 actin binding
Lsqua1794	GO:0052051 interaction with host via protein secreted by type II secretion system | GO:0009405 pathogenesis
Lsqua1795	GO:0009088 threonine biosynthetic process | GO:0009089 lysine biosynthetic process via diaminopimelate | GO:0016310 phosphorylation		GO:0004072 aspartate kinase activity | GO:0016597 amino acid binding
Lsqua1796	GO:0006520 cellular amino acid metabolic process | GO:0009058 biosynthetic process		GO:0030170 pyridoxal phosphate binding | GO:0004069 L-aspartate:2-oxoglutarate aminotransferase activity | GO:0080130 L-phenylalanine:2-oxoglutarate aminotransferase activity
Lsqua1797	GO:0006446 regulation of translational initiation | GO:0001731 formation of translation preinitiation complex	GO:0005852 eukaryotic translation initiation factor 3 complex | GO:0016282 eukaryotic 43S preinitiation complex | GO:0033290 eukaryotic 48S preinitiation complex	GO:0045735 nutrient reservoir activity | GO:0003743 translation initiation factor activity
Lsqua1799	GO:0006412 translation	GO:0005840 ribosome	GO:0003735 structural constituent of ribosome | GO:0003723 RNA binding
Lsqua1801	GO:0006278 RNA-dependent DNA replication		GO:0003964 RNA-directed DNA polymerase activity | GO:0003723 RNA binding
Lsqua1802	GO:0001302 replicative cell aging | GO:0006184 GTP catabolic process | GO:0030437 ascospore formation | GO:0007189 activation of adenylate cyclase activity by G-protein signaling pathway | GO:0007124 pseudohyphal growth | GO:0008361 regulation of cell size | GO:0010255 glucose mediated signaling pathway	GO:0005886 plasma membrane | GO:0005739 mitochondrion	GO:0004871 signal transducer activity | GO:0005525 GTP binding | GO:0031683 G-protein beta/gamma-subunit complex binding | GO:0001664 G-protein coupled receptor binding | GO:0003924 GTPase activity
Lsqua1803	GO:0019464 glycine decarboxylation via glycine cleavage system	GO:0005960 glycine cleavage complex
Lsqua1805	GO:0055085 transmembrane transport	GO:0016021 integral to membrane
Lsqua1806		GO:0005730 nucleolus	GO:0005525 GTP binding
Lsqua1808	GO:0035690 cellular response to drug | GO:0006413 translational initiation		GO:0003743 translation initiation factor activity
Lsqua1809	GO:0003333 amino acid transmembrane transport	GO:0016021 integral to membrane	GO:0015171 amino acid transmembrane transporter activity
Lsqua1811	GO:0006096 glycolysis | GO:0006090 pyruvate metabolic process | GO:0016310 phosphorylation	GO:0005622 intracellular	GO:0004743 pyruvate kinase activity | GO:0030955 potassium ion binding | GO:0000287 magnesium ion binding
Lsqua1812		GO:0016021 integral to membrane
Lsqua1813	GO:0055085 transmembrane transport	GO:0016021 integral to membrane
Lsqua1814	GO:0008152 metabolic process		GO:0046872 metal ion binding | GO:0004802 transketolase activity
Lsqua1815	GO:0006412 translation	GO:0005840 ribosome | GO:0009507 chloroplast | GO:0005739 mitochondrion	GO:0003735 structural constituent of ribosome | GO:0019843 rRNA binding | GO:0000049 tRNA binding
Lsqua1816	GO:0055114 oxidation-reduction process		GO:0020037 heme binding | GO:0016705 oxidoreductase activity, acting on paired donors, with incorporation or reduction of molecular oxygen | GO:0004497 monooxygenase activity | GO:0005506 iron ion binding
Lsqua1817	GO:0055114 oxidation-reduction process		GO:0016491 oxidoreductase activity
Lsqua1818	GO:0055114 oxidation-reduction process		GO:0016491 oxidoreductase activity
Lsqua1820	GO:0006412 translation	GO:0005840 ribosome	GO:0003735 structural constituent of ribosome
Lsqua1821			GO:0005525 GTP binding
Lsqua1822	GO:0008152 metabolic process		GO:0016787 hydrolase activity | GO:0005525 GTP binding
Lsqua1823	GO:0006777 Mo-molybdopterin cofactor biosynthetic process | GO:0006508 proteolysis | GO:0055114 oxidation-reduction process	GO:0019008 molybdopterin synthase complex	GO:0046872 metal ion binding | GO:0016491 oxidoreductase activity | GO:0004222 metalloendopeptidase activity | GO:0051539 4 iron, 4 sulfur cluster binding
Lsqua1824	GO:0006468 protein phosphorylation		GO:0004672 protein kinase activity | GO:0005524 ATP binding
Lsqua1825	GO:0055114 oxidation-reduction process | GO:0009165 nucleotide biosynthetic process | GO:0006545 glycine biosynthetic process | GO:0006200 ATP catabolic process		GO:0008026 ATP-dependent helicase activity | GO:0050661 NADP binding | GO:0004146 dihydrofolate reductase activity | GO:0003676 nucleic acid binding | GO:0005524 ATP binding
Lsqua1826	GO:0006435 threonyl-tRNA aminoacylation	GO:0005737 cytoplasm	GO:0004829 threonine-tRNA ligase activity | GO:0005524 ATP binding
Lsqua1827	GO:0090305 nucleic acid phosphodiester bond hydrolysis	GO:0005622 intracellular	GO:0003676 nucleic acid binding | GO:0004527 exonuclease activity
Lsqua1828	GO:0042254 ribosome biogenesis | GO:0055114 oxidation-reduction process	GO:0005840 ribosome	GO:0016491 oxidoreductase activity | GO:0005524 ATP binding | GO:0017111 nucleoside-triphosphatase activity
Lsqua1829		GO:0000228 nuclear chromosome
Lsqua1831	GO:0009082 branched chain family amino acid biosynthetic process		GO:0052654 L-leucine transaminase activity | GO:0052655 L-valine transaminase activity | GO:0052656 L-isoleucine transaminase activity
Lsqua1832	GO:0055114 oxidation-reduction process | GO:0006066 alcohol metabolic process		GO:0050660 flavin adenine dinucleotide binding | GO:0008812 choline dehydrogenase activity
Lsqua1833	GO:0043085 positive regulation of catalytic activity		GO:0019211 phosphatase activator activity | GO:0016853 isomerase activity
Lsqua1834	GO:0007094 mitotic cell cycle spindle assembly checkpoint
Lsqua1836	GO:0006810 transport	GO:0016021 integral to membrane
Lsqua1837	GO:0006886 intracellular protein transport	GO:0005634 nucleus	GO:0008536 Ran GTPase binding
Lsqua1839	GO:0006457 protein folding | GO:0055114 oxidation-reduction process	GO:0005783 endoplasmic reticulum	GO:0016671 oxidoreductase activity, acting on a sulfur group of donors, disulfide as acceptor | GO:0003756 protein disulfide isomerase activity
Lsqua1840	GO:0055114 oxidation-reduction process		GO:0016491 oxidoreductase activity
Lsqua1841	GO:0008152 metabolic process	GO:0005789 endoplasmic reticulum membrane	GO:0016757 transferase activity, transferring glycosyl groups
Lsqua1842	GO:0017183 peptidyl-diphthamide biosynthetic process from peptidyl-histidine | GO:0032259 methylation		GO:0004164 diphthine synthase activity
Lsqua1843	GO:0009103 lipopolysaccharide biosynthetic process		GO:0045735 nutrient reservoir activity | GO:0004347 glucose-6-phosphate isomerase activity | GO:0008830 dTDP-4-dehydrorhamnose 3,5-epimerase activity | GO:0046564 oxalate decarboxylase activity
Lsqua1844		GO:0016021 integral to membrane
Lsqua1846	GO:0044262 cellular carbohydrate metabolic process | GO:0006108 malate metabolic process | GO:0006468 protein phosphorylation | GO:0006099 tricarboxylic acid cycle		GO:0030060 L-malate dehydrogenase activity | GO:0005524 ATP binding | GO:0004674 protein serine/threonine kinase activity
Lsqua1848	GO:0042176 regulation of protein catabolic process | GO:0050790 regulation of catalytic activity | GO:0055114 oxidation-reduction process	GO:0000502 proteasome complex	GO:0051287 NAD binding | GO:0016616 oxidoreductase activity, acting on the CH-OH group of donors, NAD or NADP as acceptor | GO:0030234 enzyme regulator activity
Lsqua1849	GO:0055114 oxidation-reduction process	GO:0005829 cytosol	GO:0051287 NAD binding | GO:0016616 oxidoreductase activity, acting on the CH-OH group of donors, NAD or NADP as acceptor
Lsqua1850	GO:0008152 metabolic process		GO:0016772 transferase activity, transferring phosphorus-containing groups
Lsqua1851	GO:0055114 oxidation-reduction process		GO:0018658 salicylate 1-monooxygenase activity
Lsqua1853			GO:0005509 calcium ion binding
Lsqua1855	GO:0006184 GTP catabolic process		GO:0003924 GTPase activity | GO:0005525 GTP binding
Lsqua1857	GO:0055085 transmembrane transport
Lsqua1858		GO:0016020 membrane
Lsqua1860	GO:0006412 translation	GO:0015934 large ribosomal subunit	GO:0003735 structural constituent of ribosome
Lsqua1861	GO:0006412 translation	GO:0005840 ribosome	GO:0046872 metal ion binding | GO:0003735 structural constituent of ribosome
Lsqua1863	GO:0006412 translation	GO:0005840 ribosome	GO:0046872 metal ion binding | GO:0003735 structural constituent of ribosome
Lsqua1864	GO:0006184 GTP catabolic process | GO:0007186 G-protein coupled receptor signaling pathway		GO:0004871 signal transducer activity | GO:0031683 G-protein beta/gamma-subunit complex binding | GO:0003924 GTPase activity | GO:0005525 GTP binding
Lsqua1865	GO:0009308 amine metabolic process | GO:0006508 proteolysis | GO:0009651 response to salt stress | GO:0009737 response to abscisic acid stimulus | GO:0055114 oxidation-reduction process	GO:0005730 nucleolus	GO:0008131 primary amine oxidase activity | GO:0005507 copper ion binding | GO:0048038 quinone binding | GO:0004190 aspartic-type endopeptidase activity
Lsqua1866	GO:0008152 metabolic process		GO:0016757 transferase activity, transferring glycosyl groups
Lsqua1868	GO:0008152 metabolic process		GO:0016740 transferase activity
Lsqua1869	GO:0006412 translation	GO:0005840 ribosome	GO:0003735 structural constituent of ribosome
Lsqua1871	GO:0055114 oxidation-reduction process		GO:0008270 zinc ion binding | GO:0016491 oxidoreductase activity
Lsqua1875	GO:0008152 metabolic process | GO:0046677 response to antibiotic		GO:0005524 ATP binding | GO:0016773 phosphotransferase activity, alcohol group as acceptor
Lsqua1876	GO:0008152 metabolic process		GO:0016853 isomerase activity
Lsqua1877	GO:0046294 formaldehyde catabolic process		GO:0018738 S-formylglutathione hydrolase activity | GO:0052689 carboxylic ester hydrolase activity
Lsqua1878	GO:0055114 oxidation-reduction process		GO:0020037 heme binding | GO:0016705 oxidoreductase activity, acting on paired donors, with incorporation or reduction of molecular oxygen | GO:0004497 monooxygenase activity | GO:0005506 iron ion binding
Lsqua1879		GO:0005840 ribosome
Lsqua1881	GO:0055114 oxidation-reduction process		GO:0016491 oxidoreductase activity
Lsqua1883	GO:0016998 cell wall macromolecule catabolic process
Lsqua1884	GO:0008152 metabolic process		GO:0016787 hydrolase activity
Lsqua1889		GO:0005763 mitochondrial small ribosomal subunit	GO:0003735 structural constituent of ribosome
Lsqua1890	GO:0034220 ion transmembrane transport	GO:0016021 integral to membrane	GO:0005216 ion channel activity | GO:0005509 calcium ion binding
Lsqua1891	GO:0007165 signal transduction	GO:0005622 intracellular
Lsqua1892	GO:0006810 transport	GO:0016021 integral to membrane
Lsqua1893	GO:0019427 acetyl-CoA biosynthetic process from acetate		GO:0016208 AMP binding | GO:0005524 ATP binding | GO:0003987 acetate-CoA ligase activity
Lsqua1894	GO:0032319 regulation of Rho GTPase activity		GO:0005089 Rho guanyl-nucleotide exchange factor activity
Lsqua1895	GO:0006081 cellular aldehyde metabolic process | GO:0055114 oxidation-reduction process		GO:0004030 aldehyde dehydrogenase [NAD(P)+] activity
Lsqua1896	GO:0006468 protein phosphorylation | GO:0006914 autophagy		GO:0005524 ATP binding | GO:0004674 protein serine/threonine kinase activity
Lsqua1900	GO:0006511 ubiquitin-dependent protein catabolic process	GO:0031461 cullin-RING ubiquitin ligase complex	GO:0016874 ligase activity | GO:0031625 ubiquitin protein ligase binding
Lsqua1901	GO:0007264 small GTPase mediated signal transduction	GO:0005622 intracellular | GO:0016020 membrane	GO:0005525 GTP binding
Lsqua1902	GO:0007264 small GTPase mediated signal transduction	GO:0005622 intracellular | GO:0016020 membrane	GO:0005525 GTP binding
Lsqua1903	GO:0055114 oxidation-reduction process	GO:0016021 integral to membrane	GO:0000293 ferric-chelate reductase activity
Lsqua1904	GO:0051603 proteolysis involved in cellular protein catabolic process	GO:0005737 cytoplasm | GO:0005839 proteasome core complex | GO:0005634 nucleus	GO:0004298 threonine-type endopeptidase activity
Lsqua1906	GO:0016024 CDP-diacylglycerol biosynthetic process	GO:0016021 integral to membrane	GO:0004605 phosphatidate cytidylyltransferase activity
Lsqua1909	GO:0055114 oxidation-reduction process		GO:0016706 oxidoreductase activity, acting on paired donors, with incorporation or reduction of molecular oxygen, 2-oxoglutarate as one donor, and incorporation of one atom each of oxygen into both donors
Lsqua1910	GO:0008152 metabolic process		GO:0016787 hydrolase activity
Lsqua1912	GO:0055085 transmembrane transport | GO:0006839 mitochondrial transport	GO:0016021 integral to membrane | GO:0031966 mitochondrial membrane
Lsqua1913	GO:0008152 metabolic process		GO:0016787 hydrolase activity
Lsqua1914	GO:0035556 intracellular signal transduction	GO:0005622 intracellular	GO:0008270 zinc ion binding
Lsqua1915	GO:0055114 oxidation-reduction process		GO:0051213 dioxygenase activity
Lsqua1918		GO:0016021 integral to membrane
Lsqua1919	GO:0055114 oxidation-reduction process		GO:0016491 oxidoreductase activity | GO:0000166 nucleotide binding
Lsqua1920	GO:0006096 glycolysis | GO:0046835 carbohydrate phosphorylation		GO:0005524 ATP binding | GO:0004396 hexokinase activity
Lsqua1922	GO:0019805 quinolinate biosynthetic process | GO:0055114 oxidation-reduction process | GO:0034354 de novo NAD biosynthetic process from tryptophan | GO:0043420 anthranilate metabolic process | GO:0006569 tryptophan catabolic process	GO:0005737 cytoplasm	GO:0000334 3-hydroxyanthranilate 3,4-dioxygenase activity | GO:0008198 ferrous iron binding
Lsqua1923	GO:0019805 quinolinate biosynthetic process | GO:0055114 oxidation-reduction process | GO:0034354 de novo NAD biosynthetic process from tryptophan | GO:0043420 anthranilate metabolic process | GO:0006569 tryptophan catabolic process	GO:0005737 cytoplasm	GO:0000334 3-hydroxyanthranilate 3,4-dioxygenase activity | GO:0008198 ferrous iron binding
Lsqua1925	GO:0035335 peptidyl-tyrosine dephosphorylation | GO:0006412 translation	GO:0005840 ribosome	GO:0004725 protein tyrosine phosphatase activity | GO:0003735 structural constituent of ribosome
Lsqua1926	GO:0035335 peptidyl-tyrosine dephosphorylation		GO:0004725 protein tyrosine phosphatase activity
Lsqua1927	GO:0006422 aspartyl-tRNA aminoacylation	GO:0005737 cytoplasm	GO:0003676 nucleic acid binding | GO:0005524 ATP binding | GO:0004815 aspartate-tRNA ligase activity
Lsqua1928	GO:0006810 transport	GO:0016021 integral to membrane
Lsqua1929	GO:0006468 protein phosphorylation		GO:0005524 ATP binding | GO:0004674 protein serine/threonine kinase activity
Lsqua1932		GO:0005643 nuclear pore	GO:0017056 structural constituent of nuclear pore
Lsqua1933	GO:0090305 nucleic acid phosphodiester bond hydrolysis		GO:0004519 endonuclease activity
Lsqua1936	GO:0006810 transport | GO:0009651 response to salt stress	GO:0005618 cell wall | GO:0005774 vacuolar membrane | GO:0016021 integral to membrane | GO:0009507 chloroplast
Lsqua1939	GO:0006436 tryptophanyl-tRNA aminoacylation	GO:0005737 cytoplasm	GO:0004830 tryptophan-tRNA ligase activity | GO:0005524 ATP binding
Lsqua1940	GO:0006413 translational initiation | GO:0006452 translational frameshifting | GO:0008612 peptidyl-lysine modification to hypusine | GO:0045905 positive regulation of translational termination | GO:0045901 positive regulation of translational elongation		GO:0003743 translation initiation factor activity | GO:0003746 translation elongation factor activity | GO:0043022 ribosome binding
Lsqua1942	GO:0007018 microtubule-based movement | GO:0008152 metabolic process	GO:0005871 kinesin complex | GO:0005874 microtubule	GO:0008017 microtubule binding | GO:0005524 ATP binding | GO:0003777 microtubule motor activity
Lsqua1943	GO:0015693 magnesium ion transport	GO:0016020 membrane	GO:0015095 magnesium ion transmembrane transporter activity
Lsqua1945	GO:0006508 proteolysis | GO:0006123 mitochondrial electron transport, cytochrome c to oxygen	GO:0016021 integral to membrane | GO:0005751 mitochondrial respiratory chain complex IV	GO:0017111 nucleoside-triphosphatase activity | GO:0004129 cytochrome-c oxidase activity | GO:0008270 zinc ion binding | GO:0004222 metalloendopeptidase activity | GO:0005524 ATP binding
Lsqua1946			GO:0003676 nucleic acid binding
Lsqua1948	GO:0006412 translation	GO:0005840 ribosome	GO:0003735 structural constituent of ribosome
Lsqua1949	GO:0005975 carbohydrate metabolic process		GO:0004553 hydrolase activity, hydrolyzing O-glycosyl compounds
Lsqua1951	GO:0006357 regulation of transcription from RNA polymerase II promoter | GO:0007165 signal transduction	GO:0005634 nucleus	GO:0008270 zinc ion binding | GO:0004871 signal transducer activity | GO:0000981 sequence-specific DNA binding RNA polymerase II transcription factor activity
Lsqua1952	GO:0006412 translation	GO:0005840 ribosome	GO:0003735 structural constituent of ribosome | GO:0003723 RNA binding
Lsqua1954			GO:0005509 calcium ion binding
Lsqua1955		GO:0005634 nucleus	GO:0003779 actin binding | GO:0003677 DNA binding
Lsqua1956	GO:0019058 viral infectious cycle | GO:0048566 embryonic digestive tract development | GO:0001822 kidney development | GO:0007507 heart development | GO:0006465 signal peptide processing | GO:0035108 limb morphogenesis | GO:0048706 embryonic skeletal system development | GO:0042089 cytokine biosynthetic process | GO:0002001 renin secretion into blood stream | GO:0030323 respiratory tube developme…	GO:0030141 secretory granule | GO:0005615 extracellular space | GO:0005794 Golgi apparatus | GO:0016021 integral to membrane	GO:0004252 serine-type endopeptidase activity | GO:0051536 iron-sulfur cluster binding | GO:0042277 peptide binding
Lsqua1957	GO:0070588 calcium ion transmembrane transport | GO:0001172 transcription, RNA-dependent	GO:0016021 integral to membrane	GO:0003968 RNA-directed RNA polymerase activity | GO:0015369 calcium:hydrogen antiporter activity
Lsqua1961	GO:0006366 transcription from RNA polymerase II promoter	GO:0005665 DNA-directed RNA polymerase II, core complex	GO:0003899 DNA-directed RNA polymerase activity | GO:0003677 DNA binding
Lsqua1962	GO:0001731 formation of translation preinitiation complex	GO:0005852 eukaryotic translation initiation factor 3 complex | GO:0016282 eukaryotic 43S preinitiation complex | GO:0033290 eukaryotic 48S preinitiation complex	GO:0003743 translation initiation factor activity
Lsqua1963	GO:0016192 vesicle-mediated transport | GO:0006886 intracellular protein transport	GO:0005794 Golgi apparatus | GO:0030117 membrane coat	GO:0008565 protein transporter activity
Lsqua1964	GO:0006413 translational initiation | GO:0006184 GTP catabolic process | GO:2000601 positive regulation of Arp2/3 complex-mediated actin nucleation	GO:0005737 cytoplasm	GO:0005525 GTP binding | GO:0003743 translation initiation factor activity | GO:0003779 actin binding | GO:0003924 GTPase activity
Lsqua1965	GO:2000601 positive regulation of Arp2/3 complex-mediated actin nucleation | GO:0006897 endocytosis	GO:0030479 actin cortical patch	GO:0003779 actin binding
Lsqua1966			GO:0030554 adenyl nucleotide binding
Lsqua1967			GO:0046872 metal ion binding
Lsqua1970	GO:0008152 metabolic process		GO:0008270 zinc ion binding | GO:0004089 carbonate dehydratase activity
Lsqua1972	GO:0008152 metabolic process		GO:0016787 hydrolase activity
Lsqua1975	GO:0009058 biosynthetic process		GO:0016740 transferase activity | GO:0030170 pyridoxal phosphate binding
Lsqua1978	GO:0030163 protein catabolic process | GO:0006508 proteolysis | GO:0051301 cell division	GO:0005737 cytoplasm | GO:0000502 proteasome complex	GO:0008233 peptidase activity | GO:0005524 ATP binding | GO:0017111 nucleoside-triphosphatase activity
Lsqua1982	GO:0006476 protein deacetylation		GO:0016811 hydrolase activity, acting on carbon-nitrogen (but not peptide) bonds, in linear amides | GO:0070403 NAD+ binding | GO:0008270 zinc ion binding
Lsqua1984	GO:0005975 carbohydrate metabolic process		GO:0004553 hydrolase activity, hydrolyzing O-glycosyl compounds
Lsqua1985	GO:0008152 metabolic process		GO:0003824 catalytic activity
Lsqua1986	GO:0090305 nucleic acid phosphodiester bond hydrolysis	GO:0016021 integral to membrane | GO:0005739 mitochondrion	GO:0046872 metal ion binding | GO:0004519 endonuclease activity | GO:0003676 nucleic acid binding
Lsqua1987	GO:0009405 pathogenesis | GO:0000754 adaptation of signaling pathway by response to pheromone involved in conjugation with cellular fusion | GO:0016311 dephosphorylation | GO:0031505 fungal-type cell wall organization | GO:0006873 cellular ion homeostasis	GO:0005955 calcineurin complex	GO:0005509 calcium ion binding | GO:0004721 phosphoprotein phosphatase activity
Lsqua1988	GO:0008152 metabolic process		GO:0008146 sulfotransferase activity | GO:0016829 lyase activity
Lsqua1989	GO:0035335 peptidyl-tyrosine dephosphorylation | GO:0006367 transcription initiation from RNA polymerase II promoter	GO:0005673 transcription factor TFIIE complex	GO:0004725 protein tyrosine phosphatase activity | GO:0008138 protein tyrosine/serine/threonine phosphatase activity
Lsqua1990	GO:0055085 transmembrane transport	GO:0016021 integral to membrane
Lsqua1992	GO:0007346 regulation of mitotic cell cycle	GO:0005829 cytosol | GO:0005634 nucleus
Lsqua1993	GO:0006355 regulation of transcription, DNA-dependent	GO:0005634 nucleus	GO:0003700 sequence-specific DNA binding transcription factor activity | GO:0043565 sequence-specific DNA binding
Lsqua1994	GO:0006457 protein folding	GO:0016272 prefoldin complex	GO:0051082 unfolded protein binding
Lsqua1995	GO:0006412 translation	GO:0005840 ribosome	GO:0003735 structural constituent of ribosome
Lsqua1996	GO:0055114 oxidation-reduction process		GO:0004386 helicase activity | GO:0003676 nucleic acid binding | GO:0008137 NADH dehydrogenase (ubiquinone) activity | GO:0010181 FMN binding | GO:0005524 ATP binding | GO:0051539 4 iron, 4 sulfur cluster binding
Lsqua1999		GO:0016020 membrane
Lsqua2001			GO:0035091 phosphatidylinositol binding
Lsqua2002			GO:0035091 phosphatidylinositol binding
Lsqua2003	GO:0006355 regulation of transcription, DNA-dependent		GO:0003700 sequence-specific DNA binding transcription factor activity | GO:0043565 sequence-specific DNA binding
Lsqua2004	GO:0008152 metabolic process		GO:0016853 isomerase activity
Lsqua2005			GO:0008270 zinc ion binding
Lsqua2007	GO:0008152 metabolic process		GO:0016787 hydrolase activity
Lsqua2008	GO:0008152 metabolic process		GO:0016787 hydrolase activity
Lsqua2010			GO:0008270 zinc ion binding | GO:0003676 nucleic acid binding
Lsqua2012			GO:0005198 structural molecule activity
Lsqua2014	GO:0008152 metabolic process		GO:0008080 N-acetyltransferase activity
Lsqua2015	GO:0008152 metabolic process		GO:0008080 N-acetyltransferase activity
Lsqua2019	GO:0070588 calcium ion transmembrane transport | GO:0008152 metabolic process	GO:0016021 integral to membrane	GO:0005388 calcium-transporting ATPase activity | GO:0046872 metal ion binding | GO:0005524 ATP binding
Lsqua2020	GO:0006508 proteolysis		GO:0004190 aspartic-type endopeptidase activity
Lsqua2021	GO:0055114 oxidation-reduction process		GO:0016491 oxidoreductase activity
Lsqua2022	GO:0006200 ATP catabolic process		GO:0003676 nucleic acid binding | GO:0008026 ATP-dependent helicase activity | GO:0005524 ATP binding
Lsqua2023	GO:0055114 oxidation-reduction process		GO:0004030 aldehyde dehydrogenase [NAD(P)+] activity
Lsqua2024	GO:0055114 oxidation-reduction process		GO:0016491 oxidoreductase activity
Lsqua2026	GO:0016192 vesicle-mediated transport | GO:0006886 intracellular protein transport		GO:0008270 zinc ion binding
Lsqua2027	GO:0016192 vesicle-mediated transport | GO:0006886 intracellular protein transport		GO:0008270 zinc ion binding
Lsqua2028	GO:0006355 regulation of transcription, DNA-dependent | GO:0016573 histone acetylation	GO:0005634 nucleus	GO:0003712 transcription cofactor activity | GO:0008270 zinc ion binding | GO:0004402 histone acetyltransferase activity
Lsqua2030	GO:0023014 signal transduction via phosphorylation event | GO:0035556 intracellular signal transduction | GO:0000160 two-component signal transduction system (phosphorelay)	GO:0016020 membrane	GO:0000155 two-component sensor activity | GO:0005524 ATP binding | GO:0000156 two-component response regulator activity
Lsqua2031	GO:0008152 metabolic process		GO:0016787 hydrolase activity
Lsqua2034	GO:0006457 protein folding | GO:0000413 protein peptidyl-prolyl isomerization		GO:0003676 nucleic acid binding | GO:0003755 peptidyl-prolyl cis-trans isomerase activity | GO:0000166 nucleotide binding
Lsqua2035	GO:0008152 metabolic process		GO:0003824 catalytic activity
Lsqua2037		GO:0016020 membrane
Lsqua2038	GO:0055085 transmembrane transport | GO:0015693 magnesium ion transport	GO:0016020 membrane	GO:0015095 magnesium ion transmembrane transporter activity
Lsqua2039	GO:0034220 ion transmembrane transport | GO:0044070 regulation of anion transport | GO:0006821 chloride transport	GO:0016021 integral to membrane	GO:0030554 adenyl nucleotide binding | GO:0005247 voltage-gated chloride channel activity
Lsqua2040	GO:0008152 metabolic process		GO:0016787 hydrolase activity | GO:0030145 manganese ion binding | GO:0003723 RNA binding
Lsqua2041			GO:0003676 nucleic acid binding | GO:0000166 nucleotide binding
Lsqua2042	GO:0006184 GTP catabolic process | GO:0007186 G-protein coupled receptor signaling pathway		GO:0004871 signal transducer activity | GO:0031683 G-protein beta/gamma-subunit complex binding | GO:0003924 GTPase activity | GO:0005525 GTP binding
Lsqua2043	GO:0006357 regulation of transcription from RNA polymerase II promoter	GO:0005634 nucleus	GO:0003723 RNA binding | GO:0008270 zinc ion binding | GO:0000981 sequence-specific DNA binding RNA polymerase II transcription factor activity | GO:0003677 DNA binding
Lsqua2044	GO:0008152 metabolic process		GO:0003824 catalytic activity
Lsqua2045	GO:0000495 box H/ACA snoRNA 3'-end processing | GO:0031120 snRNA pseudouridine synthesis | GO:0031118 rRNA pseudouridine synthesis	GO:0019013 viral nucleocapsid | GO:0031429 box H/ACA snoRNP complex | GO:0030686 90S preribosome	GO:0003723 RNA binding | GO:0009982 pseudouridine synthase activity
Lsqua2046	GO:0006355 regulation of transcription, DNA-dependent		GO:0003700 sequence-specific DNA binding transcription factor activity | GO:0043565 sequence-specific DNA binding
Lsqua2047		GO:0019013 viral nucleocapsid | GO:0030529 ribonucleoprotein complex	GO:0003676 nucleic acid binding | GO:0000166 nucleotide binding
Lsqua2048		GO:0019013 viral nucleocapsid | GO:0030529 ribonucleoprotein complex	GO:0003676 nucleic acid binding | GO:0000166 nucleotide binding
Lsqua2049	GO:0008152 metabolic process		GO:0003824 catalytic activity
Lsqua2051		GO:0005743 mitochondrial inner membrane | GO:0016021 integral to membrane
Lsqua2052	GO:0006777 Mo-molybdopterin cofactor biosynthetic process
Lsqua2053	GO:0006355 regulation of transcription, DNA-dependent	GO:0005634 nucleus	GO:0003700 sequence-specific DNA binding transcription factor activity | GO:0043565 sequence-specific DNA binding
Lsqua2055	GO:0006098 pentose-phosphate shunt | GO:0045332 phospholipid translocation | GO:0006094 gluconeogenesis | GO:0006812 cation transport | GO:0006096 glycolysis	GO:0016021 integral to membrane	GO:0019829 cation-transporting ATPase activity | GO:0005524 ATP binding | GO:0004807 triose-phosphate isomerase activity | GO:0000287 magnesium ion binding | GO:0004012 phospholipid-translocating ATPase activity
Lsqua2057		GO:0005622 intracellular
Lsqua2058	GO:0035690 cellular response to drug
Lsqua2060	GO:0008152 metabolic process		GO:0017111 nucleoside-triphosphatase activity | GO:0005524 ATP binding
Lsqua2061	GO:0008152 metabolic process		GO:0017111 nucleoside-triphosphatase activity | GO:0005524 ATP binding
Lsqua2067	GO:0055085 transmembrane transport	GO:0016021 integral to membrane
Lsqua2068			GO:0008270 zinc ion binding
Lsqua2069	GO:0008152 metabolic process		GO:0003988 acetyl-CoA C-acyltransferase activity
Lsqua2071		GO:0005576 extracellular region
Lsqua2075	GO:0005975 carbohydrate metabolic process | GO:0009405 pathogenesis | GO:0071216 cellular response to biotic stimulus | GO:0006046 N-acetylglucosamine catabolic process | GO:0006043 glucosamine catabolic process | GO:0009267 cellular response to starvation		GO:0008448 N-acetylglucosamine-6-phosphate deacetylase activity
Lsqua2076	GO:0018298 protein-chromophore linkage | GO:0006508 proteolysis		GO:0004252 serine-type endopeptidase activity | GO:0004177 aminopeptidase activity
Lsqua2077	GO:0006508 proteolysis		GO:0008236 serine-type peptidase activity
Lsqua2078	GO:0006357 regulation of transcription from RNA polymerase II promoter	GO:0005634 nucleus	GO:0005507 copper ion binding | GO:0008270 zinc ion binding | GO:0000981 sequence-specific DNA binding RNA polymerase II transcription factor activity | GO:0003677 DNA binding
Lsqua2079	GO:0055085 transmembrane transport	GO:0016021 integral to membrane
Lsqua2080	GO:0055085 transmembrane transport	GO:0016021 integral to membrane
Lsqua2081	GO:0008152 metabolic process		GO:0016787 hydrolase activity | GO:0008536 Ran GTPase binding
Lsqua2082			GO:0003723 RNA binding
Lsqua2083	GO:0009396 folic acid-containing compound biosynthetic process		GO:0030272 5-formyltetrahydrofolate cyclo-ligase activity | GO:0003676 nucleic acid binding | GO:0046872 metal ion binding | GO:0005524 ATP binding
Lsqua2085	GO:0008152 metabolic process		GO:0016787 hydrolase activity
Lsqua2086	GO:0055114 oxidation-reduction process		GO:0020037 heme binding | GO:0016705 oxidoreductase activity, acting on paired donors, with incorporation or reduction of molecular oxygen | GO:0004497 monooxygenase activity | GO:0005506 iron ion binding
Lsqua2087	GO:0006412 translation	GO:0005840 ribosome	GO:0003735 structural constituent of ribosome
Lsqua2088	GO:0015074 DNA integration		GO:0003676 nucleic acid binding | GO:0008270 zinc ion binding
Lsqua2090	GO:0000162 tryptophan biosynthetic process		GO:0004048 anthranilate phosphoribosyltransferase activity
Lsqua2091			GO:0008270 zinc ion binding
Lsqua2093	GO:0008152 metabolic process	GO:0005634 nucleus	GO:0004386 helicase activity | GO:0003677 DNA binding | GO:0005524 ATP binding
Lsqua2094	GO:0055114 oxidation-reduction process		GO:0050660 flavin adenine dinucleotide binding | GO:0004499 flavin-containing monooxygenase activity | GO:0050661 NADP binding
Lsqua2095	GO:0015986 ATP synthesis coupled proton transport	GO:0045263 proton-transporting ATP synthase complex, coupling factor F(o)	GO:0015078 hydrogen ion transmembrane transporter activity
Lsqua2097	GO:0071266 'de novo' L-methionine biosynthetic process | GO:0016310 phosphorylation | GO:0008299 isoprenoid biosynthetic process	GO:0005737 cytoplasm	GO:0005524 ATP binding | GO:0004121 cystathionine beta-lyase activity | GO:0030170 pyridoxal phosphate binding | GO:0004496 mevalonate kinase activity
Lsqua2098		GO:0016021 integral to membrane
Lsqua2099	GO:0055114 oxidation-reduction process		GO:0050040 lactate 2-monooxygenase activity | GO:0010181 FMN binding
Lsqua2100	GO:0006446 regulation of translational initiation | GO:0001731 formation of translation preinitiation complex	GO:0005852 eukaryotic translation initiation factor 3 complex | GO:0016282 eukaryotic 43S preinitiation complex | GO:0033290 eukaryotic 48S preinitiation complex	GO:0003743 translation initiation factor activity
Lsqua2101	GO:0055114 oxidation-reduction process		GO:0004601 peroxidase activity
Lsqua2102	GO:0055114 oxidation-reduction process | GO:0009165 nucleotide biosynthetic process | GO:0006545 glycine biosynthetic process | GO:0006200 ATP catabolic process		GO:0008026 ATP-dependent helicase activity | GO:0050661 NADP binding | GO:0004146 dihydrofolate reductase activity | GO:0003676 nucleic acid binding | GO:0005524 ATP binding
Lsqua2103	GO:0000737 DNA catabolic process, endonucleolytic		GO:0016888 endodeoxyribonuclease activity, producing 5'-phosphomonoesters
Lsqua2104			GO:0003676 nucleic acid binding
Lsqua2106	GO:0055085 transmembrane transport	GO:0005741 mitochondrial outer membrane
Lsqua2108	GO:0007005 mitochondrion organization	GO:0005743 mitochondrial inner membrane
Lsqua2111	GO:0006629 lipid metabolic process | GO:0055114 oxidation-reduction process	GO:0005794 Golgi apparatus | GO:0009506 plasmodesma | GO:0005886 plasma membrane | GO:0005774 vacuolar membrane | GO:0016021 integral to membrane | GO:0005783 endoplasmic reticulum	GO:0016627 oxidoreductase activity, acting on the CH-CH group of donors
Lsqua2112	GO:0006629 lipid metabolic process | GO:0055114 oxidation-reduction process	GO:0005794 Golgi apparatus | GO:0009506 plasmodesma | GO:0005886 plasma membrane | GO:0005774 vacuolar membrane | GO:0016021 integral to membrane | GO:0005783 endoplasmic reticulum	GO:0016627 oxidoreductase activity, acting on the CH-CH group of donors
Lsqua2113	GO:0006633 fatty acid biosynthetic process | GO:0006546 glycine catabolic process | GO:0009059 macromolecule biosynthetic process | GO:0032259 methylation	GO:0005737 cytoplasm	GO:0008897 holo-[acyl-carrier-protein] synthase activity | GO:0004047 aminomethyltransferase activity | GO:0000287 magnesium ion binding
Lsqua2117	GO:0006355 regulation of transcription, DNA-dependent | GO:0006338 chromatin remodeling	GO:0000228 nuclear chromosome	GO:0008270 zinc ion binding
Lsqua2119	GO:0006897 endocytosis	GO:0016020 membrane
Lsqua2120	GO:0006812 cation transport | GO:0055085 transmembrane transport	GO:0016021 integral to membrane	GO:0008324 cation transmembrane transporter activity | GO:0051536 iron-sulfur cluster binding
Lsqua2121	GO:0006614 SRP-dependent cotranslational protein targeting to membrane	GO:0005786 signal recognition particle, endoplasmic reticulum targeting	GO:0030942 endoplasmic reticulum signal peptide binding | GO:0005047 signal recognition particle binding | GO:0008312 7S RNA binding
Lsqua2122	GO:0006413 translational initiation | GO:0006367 transcription initiation from RNA polymerase II promoter | GO:0006355 regulation of transcription, DNA-dependent	GO:0005672 transcription factor TFIIA complex	GO:0003743 translation initiation factor activity
Lsqua2124	GO:0006116 NADH oxidation | GO:0000947 amino acid catabolic process to alcohol via Ehrlich pathway | GO:0043458 ethanol biosynthetic process involved in glucose fermentation to ethanol	GO:0005739 mitochondrion | GO:0005634 nucleus	GO:0008270 zinc ion binding | GO:0019170 methylglyoxal reductase (NADH-dependent) activity | GO:0004022 alcohol dehydrogenase (NAD) activity | GO:0008926 mannitol-1-phosphate 5-dehydrogenase activity
Lsqua2128	GO:0019805 quinolinate biosynthetic process | GO:0055114 oxidation-reduction process | GO:0006569 tryptophan catabolic process		GO:0050660 flavin adenine dinucleotide binding | GO:0004502 kynurenine 3-monooxygenase activity
Lsqua2131	GO:0019285 glycine betaine biosynthetic process from choline | GO:0055114 oxidation-reduction process	GO:0005634 nucleus | GO:0005829 cytosol | GO:0005739 mitochondrion	GO:0004043 L-aminoadipate-semialdehyde dehydrogenase activity | GO:0008802 betaine-aldehyde dehydrogenase activity
Lsqua2134	GO:0071216 cellular response to biotic stimulus | GO:0055114 oxidation-reduction process | GO:0009267 cellular response to starvation | GO:0000122 negative regulation of transcription from RNA polymerase II promoter	GO:0005634 nucleus	GO:0051287 NAD binding | GO:0016616 oxidoreductase activity, acting on the CH-OH group of donors, NAD or NADP as acceptor | GO:0003677 DNA binding | GO:0003700 sequence-specific DNA binding transcription factor activity
Lsqua2136	GO:0055114 oxidation-reduction process		GO:0016491 oxidoreductase activity
Lsqua2137	GO:0007264 small GTPase mediated signal transduction	GO:0005622 intracellular | GO:0016020 membrane	GO:0005525 GTP binding
Lsqua2138	GO:0032319 regulation of Rho GTPase activity		GO:0005089 Rho guanyl-nucleotide exchange factor activity | GO:0046872 metal ion binding
Lsqua2139		GO:0019013 viral nucleocapsid | GO:0030529 ribonucleoprotein complex | GO:0005634 nucleus	GO:0003723 RNA binding
Lsqua2140	GO:0032259 methylation | GO:0006139 nucleobase-containing compound metabolic process		GO:0003677 DNA binding | GO:0000166 nucleotide binding | GO:0008168 methyltransferase activity
Lsqua2141	GO:0006355 regulation of transcription, DNA-dependent | GO:0006508 proteolysis	GO:0005634 nucleus	GO:0046872 metal ion binding | GO:0004177 aminopeptidase activity | GO:0008237 metallopeptidase activity
Lsqua2142	GO:0006200 ATP catabolic process		GO:0003676 nucleic acid binding | GO:0008026 ATP-dependent helicase activity | GO:0005524 ATP binding
Lsqua2143	GO:0006355 regulation of transcription, DNA-dependent		GO:0003677 DNA binding
Lsqua2144	GO:0055085 transmembrane transport	GO:0005743 mitochondrial inner membrane | GO:0016021 integral to membrane	GO:0005215 transporter activity
Lsqua2145	GO:0035690 cellular response to drug | GO:0043581 mycelium development | GO:0055085 transmembrane transport	GO:0016021 integral to membrane	GO:0005215 transporter activity
Lsqua2148	GO:0008152 metabolic process		GO:0016811 hydrolase activity, acting on carbon-nitrogen (but not peptide) bonds, in linear amides
Lsqua2150	GO:0006412 translation	GO:0015934 large ribosomal subunit	GO:0003735 structural constituent of ribosome | GO:0003723 RNA binding
Lsqua2151	GO:0008152 metabolic process | GO:0007165 signal transduction		GO:0046872 metal ion binding | GO:0004114 3',5'-cyclic-nucleotide phosphodiesterase activity
Lsqua2152	GO:0008152 metabolic process | GO:0007165 signal transduction		GO:0046872 metal ion binding | GO:0004114 3',5'-cyclic-nucleotide phosphodiesterase activity
Lsqua2153	GO:0008152 metabolic process | GO:0007165 signal transduction		GO:0046872 metal ion binding | GO:0004114 3',5'-cyclic-nucleotide phosphodiesterase activity
Lsqua2154	GO:0000079 regulation of cyclin-dependent protein kinase activity		GO:0019901 protein kinase binding
Lsqua2155	GO:0006887 exocytosis	GO:0000145 exocyst
Lsqua2157	GO:0006508 proteolysis	GO:0016020 membrane	GO:0004222 metalloendopeptidase activity
Lsqua2160	GO:0050901 leukocyte tethering or rolling | GO:0006457 protein folding | GO:0006184 GTP catabolic process | GO:0006355 regulation of transcription, DNA-dependent | GO:0006468 protein phosphorylation | GO:0032259 methylation | GO:0006200 ATP catabolic process | GO:0000413 protein peptidyl-prolyl isomerization | GO:0042254 ribosome biogenesis	GO:0005886 plasma membrane | GO:0005634 nucleus	GO:0008270 zinc ion binding | GO:0008026 ATP-dependent helicase activity | GO:0008168 methyltransferase activity | GO:0005525 GTP binding | GO:0004674 protein serine/threonine kinase activity | GO:0043565 sequence-specific DNA binding | GO:0003700 sequence-specific DNA binding transcription factor activity | GO:0003755 peptidyl-prolyl cis-trans isomerase activity | GO:0003924 GTPase activity | GO…
Lsqua2161	GO:0055114 oxidation-reduction process		GO:0016491 oxidoreductase activity
Lsqua2162	GO:0006412 translation	GO:0005840 ribosome	GO:0003735 structural constituent of ribosome
Lsqua2163	GO:0006357 regulation of transcription from RNA polymerase II promoter	GO:0005634 nucleus	GO:0008270 zinc ion binding | GO:0000981 sequence-specific DNA binding RNA polymerase II transcription factor activity | GO:0003677 DNA binding
Lsqua2164	GO:0006886 intracellular protein transport | GO:0071806 protein transmembrane transport	GO:0005743 mitochondrial inner membrane	GO:0015450 P-P-bond-hydrolysis-driven protein transmembrane transporter activity
Lsqua2166		GO:0016021 integral to membrane
Lsqua2167	GO:0007264 small GTPase mediated signal transduction | GO:0006184 GTP catabolic process | GO:0030010 establishment of cell polarity | GO:0030448 hyphal growth	GO:0005622 intracellular | GO:0005886 plasma membrane	GO:0003924 GTPase activity | GO:0005525 GTP binding
Lsqua2168	GO:0055114 oxidation-reduction process		GO:0016491 oxidoreductase activity | GO:0005524 ATP binding | GO:0004075 biotin carboxylase activity | GO:0008270 zinc ion binding
Lsqua2170	GO:0006412 translation	GO:0005840 ribosome | GO:0005576 extracellular region	GO:0003735 structural constituent of ribosome | GO:0003723 RNA binding
Lsqua2171	GO:0009082 branched chain family amino acid biosynthetic process		GO:0016597 amino acid binding | GO:0003984 acetolactate synthase activity
Lsqua2172	GO:0009082 branched chain family amino acid biosynthetic process		GO:0016597 amino acid binding | GO:0003984 acetolactate synthase activity
Lsqua2176	GO:0008152 metabolic process		GO:0016787 hydrolase activity
Lsqua2179	GO:0006526 arginine biosynthetic process | GO:0016310 phosphorylation | GO:0055114 oxidation-reduction process	GO:0005739 mitochondrion	GO:0051287 NAD binding | GO:0003942 N-acetyl-gamma-glutamyl-phosphate reductase activity | GO:0046983 protein dimerization activity | GO:0003991 acetylglutamate kinase activity
Lsqua2180	GO:0000278 mitotic cell cycle | GO:0006335 DNA replication-dependent nucleosome assembly | GO:0045653 negative regulation of megakaryocyte differentiation | GO:0048015 phosphatidylinositol-mediated signaling | GO:0034080 CenH3-containing nucleosome assembly at centromere | GO:0000723 telomere maintenance | GO:0035574 histone H4-K20 demethylation	GO:0005654 nucleoplasm | GO:0000786 nucleosome | GO:0070062 extracellular vesicular exosome | GO:0000228 nuclear chromosome	GO:0035575 histone demethylase activity (H4-K20 specific) | GO:0046982 protein heterodimerization activity | GO:0003677 DNA binding
Lsqua2181	GO:0006334 nucleosome assembly	GO:0000786 nucleosome | GO:0005634 nucleus	GO:0003677 DNA binding | GO:0046982 protein heterodimerization activity
Lsqua2183	GO:0006420 arginyl-tRNA aminoacylation | GO:0032543 mitochondrial translation	GO:0005739 mitochondrion	GO:0005524 ATP binding | GO:0004814 arginine-tRNA ligase activity
Lsqua2185	GO:0055085 transmembrane transport | GO:0006200 ATP catabolic process	GO:0016021 integral to membrane	GO:0042626 ATPase activity, coupled to transmembrane movement of substances | GO:0005524 ATP binding
Lsqua2186	GO:0006412 translation | GO:0006281 DNA repair	GO:0005840 ribosome | GO:0005634 nucleus	GO:0003735 structural constituent of ribosome
Lsqua2188	GO:0008152 metabolic process		GO:0016746 transferase activity, transferring acyl groups
Lsqua2189	GO:0055114 oxidation-reduction process		GO:0046564 oxalate decarboxylase activity | GO:0050162 oxalate oxidase activity | GO:0045735 nutrient reservoir activity
Lsqua2190	GO:0009813 flavonoid biosynthetic process		GO:0045430 chalcone isomerase activity
Lsqua2191	GO:0006334 nucleosome assembly	GO:0000786 nucleosome | GO:0005634 nucleus	GO:0003677 DNA binding | GO:0046982 protein heterodimerization activity
Lsqua2193	GO:0045859 regulation of protein kinase activity | GO:0007049 cell cycle | GO:0051301 cell division		GO:0016301 kinase activity | GO:0016538 cyclin-dependent protein kinase regulator activity
Lsqua2194		GO:0016021 integral to membrane	GO:0015116 sulfate transmembrane transporter activity
Lsqua2197	GO:0055085 transmembrane transport	GO:0016021 integral to membrane
Lsqua2203	GO:0018108 peptidyl-tyrosine phosphorylation		GO:0004713 protein tyrosine kinase activity | GO:0005524 ATP binding
Lsqua2204	GO:0055114 oxidation-reduction process		GO:0050660 flavin adenine dinucleotide binding | GO:0008762 UDP-N-acetylmuramate dehydrogenase activity
Lsqua2207	GO:0042823 pyridoxal phosphate biosynthetic process | GO:0055114 oxidation-reduction process		GO:0004733 pyridoxamine-phosphate oxidase activity | GO:0010181 FMN binding
Lsqua2208	GO:0046939 nucleotide phosphorylation | GO:0006172 ADP biosynthetic process	GO:0005829 cytosol | GO:0005758 mitochondrial intermembrane space	GO:0004017 adenylate kinase activity | GO:0005524 ATP binding
Lsqua2209	GO:0006031 chitin biosynthetic process	GO:0016021 integral to membrane	GO:0004100 chitin synthase activity
Lsqua2210	GO:0055085 transmembrane transport	GO:0016021 integral to membrane | GO:0005886 plasma membrane	GO:0005215 transporter activity
Lsqua2211			GO:0003676 nucleic acid binding
Lsqua2213	GO:0045900 negative regulation of translational elongation | GO:0006614 SRP-dependent cotranslational protein targeting to membrane	GO:0048500 signal recognition particle	GO:0008312 7S RNA binding
Lsqua2214	GO:0006506 GPI anchor biosynthetic process	GO:0016020 membrane	GO:0016757 transferase activity, transferring glycosyl groups | GO:0003841 1-acylglycerol-3-phosphate O-acyltransferase activity
Lsqua2217	GO:0006914 autophagy | GO:0015031 protein transport	GO:0000139 Golgi membrane | GO:0005789 endoplasmic reticulum membrane | GO:0030659 cytoplasmic vesicle membrane | GO:0034045 pre-autophagosomal structure membrane | GO:0016021 integral to membrane
Lsqua2218	GO:0006144 purine base metabolic process | GO:0055114 oxidation-reduction process		GO:0004846 urate oxidase activity
Lsqua2219		GO:0016021 integral to membrane
Lsqua2220	GO:0043581 mycelium development	GO:0005576 extracellular region
Lsqua2223	GO:0006184 GTP catabolic process		GO:0000287 magnesium ion binding | GO:0003924 GTPase activity | GO:0005525 GTP binding
Lsqua2224			GO:0003676 nucleic acid binding | GO:0000166 nucleotide binding
Lsqua2227	GO:0006446 regulation of translational initiation | GO:0001731 formation of translation preinitiation complex	GO:0005852 eukaryotic translation initiation factor 3 complex | GO:0016282 eukaryotic 43S preinitiation complex | GO:0033290 eukaryotic 48S preinitiation complex	GO:0003743 translation initiation factor activity
Lsqua2228	GO:0006508 proteolysis	GO:0005743 mitochondrial inner membrane	GO:0046872 metal ion binding | GO:0004222 metalloendopeptidase activity
Lsqua2229	GO:0006508 proteolysis	GO:0005743 mitochondrial inner membrane	GO:0046872 metal ion binding | GO:0004222 metalloendopeptidase activity
Lsqua2230	GO:0006508 proteolysis | GO:0016560 protein import into peroxisome matrix, docking	GO:0016021 integral to membrane | GO:0005777 peroxisome	GO:0004222 metalloendopeptidase activity
Lsqua2231		GO:0016020 membrane
Lsqua2232	GO:0016310 phosphorylation | GO:0006741 NADP biosynthetic process | GO:0019674 NAD metabolic process		GO:0003951 NAD+ kinase activity
Lsqua2233	GO:0009228 thiamine biosynthetic process | GO:0016310 phosphorylation		GO:0008972 phosphomethylpyrimidine kinase activity | GO:0050334 thiaminase activity | GO:0005524 ATP binding | GO:0004789 thiamine-phosphate diphosphorylase activity
Lsqua2234	GO:0043044 ATP-dependent chromatin remodeling | GO:0008152 metabolic process	GO:0005634 nucleus	GO:0004386 helicase activity | GO:0003677 DNA binding | GO:0005524 ATP binding | GO:0031491 nucleosome binding
Lsqua2235	GO:0055085 transmembrane transport	GO:0016021 integral to membrane	GO:0005215 transporter activity
Lsqua2240	GO:0035556 intracellular signal transduction | GO:0018108 peptidyl-tyrosine phosphorylation | GO:0046854 phosphatidylinositol phosphorylation		GO:0046872 metal ion binding | GO:0016307 phosphatidylinositol phosphate kinase activity | GO:0004713 protein tyrosine kinase activity | GO:0005524 ATP binding
Lsqua2241	GO:0006950 response to stress	GO:0016021 integral to membrane
Lsqua2243	GO:0006434 seryl-tRNA aminoacylation	GO:0005737 cytoplasm	GO:0004828 serine-tRNA ligase activity | GO:0005524 ATP binding
Lsqua2244	GO:0019752 carboxylic acid metabolic process		GO:0004451 isocitrate lyase activity | GO:0016881 acid-amino acid ligase activity
Lsqua2245	GO:0055114 oxidation-reduction process		GO:0020037 heme binding | GO:0016705 oxidoreductase activity, acting on paired donors, with incorporation or reduction of molecular oxygen | GO:0004497 monooxygenase activity | GO:0005506 iron ion binding
Lsqua2248	GO:0008152 metabolic process		GO:0016810 hydrolase activity, acting on carbon-nitrogen (but not peptide) bonds
Lsqua2249	GO:0006397 mRNA processing | GO:0008380 RNA splicing | GO:0006200 ATP catabolic process	GO:0005737 cytoplasm | GO:0071013 catalytic step 2 spliceosome	GO:0008270 zinc ion binding | GO:0008026 ATP-dependent helicase activity | GO:0042802 identical protein binding | GO:0005524 ATP binding
Lsqua2250			GO:0008270 zinc ion binding
Lsqua2252			GO:0003676 nucleic acid binding
Lsqua2253	GO:0015031 protein transport	GO:0005739 mitochondrion	GO:0046872 metal ion binding
Lsqua2256	GO:0051028 mRNA transport | GO:0015031 protein transport | GO:0006200 ATP catabolic process	GO:0031965 nuclear membrane | GO:0005737 cytoplasm | GO:0005643 nuclear pore	GO:0008026 ATP-dependent helicase activity | GO:0003723 RNA binding | GO:0005524 ATP binding
Lsqua2257	GO:0008152 metabolic process		GO:0033961 cis-stilbene-oxide hydrolase activity
Lsqua2258	GO:0008152 metabolic process		GO:0016740 transferase activity
Lsqua2259		GO:0005829 cytosol	GO:0003677 DNA binding
Lsqua2261	GO:0045454 cell redox homeostasis | GO:0006749 glutathione metabolic process | GO:0055114 oxidation-reduction process		GO:0050660 flavin adenine dinucleotide binding | GO:0050661 NADP binding | GO:0004362 glutathione-disulfide reductase activity
Lsqua2262	GO:0055114 oxidation-reduction process | GO:0019878 lysine biosynthetic process via aminoadipic acid		GO:0004043 L-aminoadipate-semialdehyde dehydrogenase activity | GO:0016740 transferase activity | GO:0031177 phosphopantetheine binding
Lsqua2263	GO:0006744 ubiquinone biosynthetic process | GO:0032259 methylation		GO:0008425 2-polyprenyl-6-methoxy-1,4-benzoquinone methyltransferase activity
Lsqua2264		GO:0005622 intracellular	GO:0019843 rRNA binding
Lsqua2265	GO:0006782 protoporphyrinogen IX biosynthetic process	GO:0005759 mitochondrial matrix	GO:0003870 5-aminolevulinate synthase activity | GO:0030170 pyridoxal phosphate binding
Lsqua2268	GO:0055085 transmembrane transport | GO:0006200 ATP catabolic process	GO:0016021 integral to membrane	GO:0042626 ATPase activity, coupled to transmembrane movement of substances | GO:0005524 ATP binding
Lsqua2269	GO:0055085 transmembrane transport | GO:0006200 ATP catabolic process	GO:0016021 integral to membrane	GO:0042626 ATPase activity, coupled to transmembrane movement of substances | GO:0005524 ATP binding
Lsqua2270	GO:0005975 carbohydrate metabolic process		GO:0004553 hydrolase activity, hydrolyzing O-glycosyl compounds
Lsqua2271	GO:0006839 mitochondrial transport	GO:0016021 integral to membrane | GO:0031966 mitochondrial membrane
Lsqua2273	GO:0043458 ethanol biosynthetic process involved in glucose fermentation to ethanol | GO:0006068 ethanol catabolic process | GO:0006567 threonine catabolic process	GO:0005622 intracellular	GO:0008270 zinc ion binding | GO:0004022 alcohol dehydrogenase (NAD) activity | GO:0008926 mannitol-1-phosphate 5-dehydrogenase activity | GO:0000166 nucleotide binding
Lsqua2276	GO:0055114 oxidation-reduction process		GO:0020037 heme binding | GO:0016705 oxidoreductase activity, acting on paired donors, with incorporation or reduction of molecular oxygen | GO:0004497 monooxygenase activity | GO:0005506 iron ion binding | GO:0009055 electron carrier activity
Lsqua2277	GO:0006357 regulation of transcription from RNA polymerase II promoter	GO:0005634 nucleus	GO:0000981 sequence-specific DNA binding RNA polymerase II transcription factor activity | GO:0008270 zinc ion binding
Lsqua2279	GO:0016192 vesicle-mediated transport | GO:0006886 intracellular protein transport	GO:0030117 membrane coat
Lsqua2280	GO:0006511 ubiquitin-dependent protein catabolic process	GO:0005737 cytoplasm | GO:0019773 proteasome core complex, alpha-subunit complex | GO:0005634 nucleus	GO:0004298 threonine-type endopeptidase activity
Lsqua2281	GO:0055114 oxidation-reduction process	GO:0016020 membrane	GO:0016628 oxidoreductase activity, acting on the CH-CH group of donors, NAD or NADP as acceptor
Lsqua2282	GO:0006412 translation	GO:0005840 ribosome	GO:0003735 structural constituent of ribosome | GO:0019843 rRNA binding
Lsqua2284		GO:0016021 integral to membrane
Lsqua2286		GO:0016021 integral to membrane | GO:0005774 vacuolar membrane
Lsqua2288	GO:0055114 oxidation-reduction process	GO:0005739 mitochondrion	GO:0016491 oxidoreductase activity
Lsqua2289	GO:0055114 oxidation-reduction process		GO:0016491 oxidoreductase activity
Lsqua2291	GO:0055114 oxidation-reduction process		GO:0020037 heme binding | GO:0016705 oxidoreductase activity, acting on paired donors, with incorporation or reduction of molecular oxygen | GO:0004497 monooxygenase activity | GO:0005506 iron ion binding
Lsqua2296	GO:0009423 chorismate biosynthetic process | GO:0009073 aromatic amino acid family biosynthetic process		GO:0004107 chorismate synthase activity
Lsqua2298	GO:0035434 copper ion transmembrane transport | GO:0006468 protein phosphorylation	GO:0016021 integral to membrane	GO:0004674 protein serine/threonine kinase activity | GO:0005524 ATP binding | GO:0005375 copper ion transmembrane transporter activity
Lsqua2299	GO:0006184 GTP catabolic process | GO:0007186 G-protein coupled receptor signaling pathway		GO:0004871 signal transducer activity | GO:0031683 G-protein beta/gamma-subunit complex binding | GO:0003924 GTPase activity | GO:0005525 GTP binding
Lsqua2300	GO:0006184 GTP catabolic process | GO:0007186 G-protein coupled receptor signaling pathway		GO:0004871 signal transducer activity | GO:0031683 G-protein beta/gamma-subunit complex binding | GO:0003924 GTPase activity | GO:0005525 GTP binding
Lsqua2301	GO:0006184 GTP catabolic process | GO:0007186 G-protein coupled receptor signaling pathway		GO:0004871 signal transducer activity | GO:0031683 G-protein beta/gamma-subunit complex binding | GO:0003924 GTPase activity | GO:0005525 GTP binding
Lsqua2305	GO:0006352 transcription initiation, DNA-dependent	GO:0005669 transcription factor TFIID complex	GO:0005524 ATP binding | GO:0046982 protein heterodimerization activity
Lsqua2306	GO:0006200 ATP catabolic process		GO:0008270 zinc ion binding | GO:0003676 nucleic acid binding | GO:0008026 ATP-dependent helicase activity | GO:0005524 ATP binding
Lsqua2307	GO:0055114 oxidation-reduction process	GO:0016021 integral to membrane | GO:0005741 mitochondrial outer membrane	GO:0004128 cytochrome-b5 reductase activity
Lsqua2309			GO:0008270 zinc ion binding
Lsqua2311	GO:0055114 oxidation-reduction process		GO:0016491 oxidoreductase activity
Lsqua2312		GO:0005751 mitochondrial respiratory chain complex IV	GO:0004129 cytochrome-c oxidase activity
Lsqua2313		GO:0005751 mitochondrial respiratory chain complex IV	GO:0004129 cytochrome-c oxidase activity
Lsqua2314	GO:0019551 glutamate catabolic process to 2-oxoglutarate | GO:0055114 oxidation-reduction process		GO:0004352 glutamate dehydrogenase (NAD+) activity
Lsqua2316		GO:0005802 trans-Golgi network | GO:0005774 vacuolar membrane | GO:0005794 Golgi apparatus | GO:0005768 endosome | GO:0005886 plasma membrane
Lsqua2318	GO:0006810 transport	GO:0016021 integral to membrane
Lsqua2321	GO:0055085 transmembrane transport	GO:0016021 integral to membrane	GO:0005215 transporter activity
Lsqua2323	GO:0042128 nitrate assimilation | GO:0055114 oxidation-reduction process		GO:0050660 flavin adenine dinucleotide binding | GO:0046872 metal ion binding | GO:0020037 heme binding | GO:0051537 2 iron, 2 sulfur cluster binding | GO:0008942 nitrite reductase [NAD(P)H] activity
Lsqua2325	GO:0016075 rRNA catabolic process | GO:0006396 RNA processing		GO:0003723 RNA binding | GO:0004525 ribonuclease III activity
Lsqua2326	GO:0016075 rRNA catabolic process | GO:0006396 RNA processing		GO:0003723 RNA binding | GO:0004525 ribonuclease III activity
Lsqua2328		GO:0005622 intracellular	GO:0003779 actin binding
Lsqua2329	GO:0055114 oxidation-reduction process | GO:0006200 ATP catabolic process		GO:0016491 oxidoreductase activity | GO:0005524 ATP binding | GO:0016887 ATPase activity | GO:0010181 FMN binding
Lsqua2332	GO:0006511 ubiquitin-dependent protein catabolic process	GO:0005737 cytoplasm | GO:0019773 proteasome core complex, alpha-subunit complex | GO:0005634 nucleus	GO:0004298 threonine-type endopeptidase activity
Lsqua2333	GO:0005975 carbohydrate metabolic process | GO:0045010 actin nucleation	GO:0005884 actin filament	GO:0004553 hydrolase activity, hydrolyzing O-glycosyl compounds | GO:0003779 actin binding | GO:0017048 Rho GTPase binding | GO:0030246 carbohydrate binding
Lsqua2334	GO:0009398 FMN biosynthetic process | GO:0009231 riboflavin biosynthetic process | GO:0016310 phosphorylation		GO:0046872 metal ion binding | GO:0005524 ATP binding | GO:0008531 riboflavin kinase activity
Lsqua2335	GO:0006508 proteolysis		GO:0004185 serine-type carboxypeptidase activity
Lsqua2341	GO:0035556 intracellular signal transduction
Lsqua2343	GO:0006672 ceramide metabolic process	GO:0016021 integral to membrane	GO:0016811 hydrolase activity, acting on carbon-nitrogen (but not peptide) bonds, in linear amides
Lsqua2345	GO:0055085 transmembrane transport	GO:0016021 integral to membrane | GO:0005886 plasma membrane	GO:0005215 transporter activity
Lsqua2347	GO:0016310 phosphorylation		GO:0016301 kinase activity
Lsqua2348	GO:0006468 protein phosphorylation		GO:0004672 protein kinase activity | GO:0005524 ATP binding
Lsqua2352	GO:0006843 mitochondrial citrate transport | GO:0000002 mitochondrial genome maintenance | GO:0015742 alpha-ketoglutarate transport | GO:0035674 tricarboxylic acid transmembrane transport	GO:0016021 integral to membrane | GO:0042645 mitochondrial nucleoid	GO:0005371 tricarboxylate secondary active transmembrane transporter activity
Lsqua2353	GO:0090305 nucleic acid phosphodiester bond hydrolysis | GO:0043581 mycelium development | GO:0055114 oxidation-reduction process | GO:0006281 DNA repair	GO:0005634 nucleus	GO:0004527 exonuclease activity | GO:0003677 DNA binding | GO:0016972 thiol oxidase activity
Lsqua2355	GO:0008152 metabolic process		GO:0008270 zinc ion binding | GO:0016874 ligase activity | GO:0000166 nucleotide binding
Lsqua2356	GO:0006508 proteolysis	GO:0016020 membrane	GO:0004222 metalloendopeptidase activity | GO:0005524 ATP binding | GO:0017111 nucleoside-triphosphatase activity
Lsqua2357	GO:0055114 oxidation-reduction process		GO:0015035 protein disulfide oxidoreductase activity
Lsqua2358	GO:0000463 maturation of LSU-rRNA from tricistronic rRNA transcript (SSU-rRNA, 5.8S rRNA, LSU-rRNA) | GO:0000466 maturation of 5.8S rRNA from tricistronic rRNA transcript (SSU-rRNA, 5.8S rRNA, LSU-rRNA)	GO:0005730 nucleolus | GO:0005654 nucleoplasm | GO:0030687 preribosome, large subunit precursor	GO:0043021 ribonucleoprotein complex binding
Lsqua2359	GO:0055085 transmembrane transport	GO:0016021 integral to membrane
Lsqua2361	GO:0016310 phosphorylation		GO:0016301 kinase activity
Lsqua2369	GO:0008152 metabolic process		GO:0004131 cytosine deaminase activity
Lsqua2370	GO:0006189 'de novo' IMP biosynthetic process		GO:0046872 metal ion binding | GO:0004638 phosphoribosylaminoimidazole carboxylase activity | GO:0005524 ATP binding
Lsqua2372	GO:0032007 negative regulation of TOR signaling cascade | GO:0043547 positive regulation of GTPase activity | GO:0051056 regulation of small GTPase mediated signal transduction	GO:0033596 TSC1-TSC2 complex | GO:0005634 nucleus	GO:0005096 GTPase activator activity
Lsqua2375	GO:0055114 oxidation-reduction process		GO:0008121 ubiquinol-cytochrome-c reductase activity | GO:0004497 monooxygenase activity | GO:0005506 iron ion binding | GO:0020037 heme binding | GO:0016705 oxidoreductase activity, acting on paired donors, with incorporation or reduction of molecular oxygen
Lsqua2376	GO:0090305 nucleic acid phosphodiester bond hydrolysis		GO:0004519 endonuclease activity | GO:0003677 DNA binding
Lsqua2378	GO:0009229 thiamine diphosphate biosynthetic process | GO:0006772 thiamine metabolic process | GO:0016310 phosphorylation		GO:0004788 thiamine diphosphokinase activity | GO:0016301 kinase activity | GO:0005524 ATP binding
Lsqua2379	GO:0009229 thiamine diphosphate biosynthetic process | GO:0006772 thiamine metabolic process | GO:0016310 phosphorylation		GO:0004788 thiamine diphosphokinase activity | GO:0016301 kinase activity | GO:0005524 ATP binding
Lsqua2380	GO:0009229 thiamine diphosphate biosynthetic process | GO:0006772 thiamine metabolic process | GO:0016310 phosphorylation		GO:0004788 thiamine diphosphokinase activity | GO:0016301 kinase activity | GO:0005524 ATP binding
Lsqua2381	GO:0006468 protein phosphorylation		GO:0005524 ATP binding | GO:0004674 protein serine/threonine kinase activity
Lsqua2383	GO:0005975 carbohydrate metabolic process		GO:0052692 raffinose alpha-galactosidase activity
Lsqua2384	GO:0055085 transmembrane transport	GO:0016021 integral to membrane
Lsqua2385	GO:0016311 dephosphorylation | GO:0070301 cellular response to hydrogen peroxide | GO:0031505 fungal-type cell wall organization | GO:0005993 trehalose catabolic process | GO:0005992 trehalose biosynthetic process | GO:0034605 cellular response to heat	GO:0005946 alpha,alpha-trehalose-phosphate synthase complex (UDP-forming)	GO:0003825 alpha,alpha-trehalose-phosphate synthase (UDP-forming) activity | GO:0004805 trehalose-phosphatase activity
Lsqua2388	GO:0055085 transmembrane transport	GO:0016021 integral to membrane	GO:0022891 substrate-specific transmembrane transporter activity
Lsqua2389	GO:0055085 transmembrane transport | GO:0008643 carbohydrate transport	GO:0016021 integral to membrane	GO:0022891 substrate-specific transmembrane transporter activity
Lsqua2390	GO:0055114 oxidation-reduction process		GO:0016491 oxidoreductase activity
Lsqua2391	GO:0042744 hydrogen peroxide catabolic process | GO:0070995 NADPH oxidation | GO:0043066 negative regulation of apoptotic process | GO:0051354 negative regulation of oxidoreductase activity | GO:0016480 negative regulation of transcription from RNA polymerase III promoter | GO:0043154 negative regulation of cysteine-type endopeptidase activity involved in apoptotic process | GO:2001057 reactive n…	GO:0005829 cytosol | GO:0031410 cytoplasmic vesicle | GO:0048471 perinuclear region of cytoplasm | GO:0005782 peroxisomal matrix | GO:0005634 nucleus | GO:0005739 mitochondrion	GO:0005102 receptor binding | GO:0043027 cysteine-type endopeptidase inhibitor activity involved in apoptotic process | GO:0072541 peroxynitrite reductase activity | GO:0046983 protein dimerization activity | GO:0004601 peroxidase activity | GO:0001016 RNA polymerase III regulatory region DNA binding
Lsqua2392	GO:0006414 translational elongation	GO:0005840 ribosome	GO:0003735 structural constituent of ribosome
Lsqua2393	GO:0008152 metabolic process		GO:0016881 acid-amino acid ligase activity
Lsqua2396	GO:0008152 metabolic process		GO:0017111 nucleoside-triphosphatase activity | GO:0005524 ATP binding
Lsqua2398	GO:0051258 protein polymerization | GO:0006184 GTP catabolic process | GO:0007017 microtubule-based process	GO:0005874 microtubule | GO:0005737 cytoplasm	GO:0003924 GTPase activity | GO:0005200 structural constituent of cytoskeleton | GO:0005525 GTP binding
Lsqua2400	GO:0008152 metabolic process	GO:0016459 myosin complex	GO:0003779 actin binding | GO:0005524 ATP binding | GO:0003774 motor activity
Lsqua2401	GO:0001666 response to hypoxia | GO:0016226 iron-sulfur cluster assembly | GO:0032364 oxygen homeostasis | GO:0006355 regulation of transcription, DNA-dependent
Lsqua2403	GO:0055114 oxidation-reduction process	GO:0016021 integral to membrane	GO:0016491 oxidoreductase activity
Lsqua2405	GO:0006412 translation	GO:0005840 ribosome	GO:0003735 structural constituent of ribosome
Lsqua2406			GO:0003723 RNA binding
Lsqua2407	GO:0000079 regulation of cyclin-dependent protein kinase activity		GO:0019901 protein kinase binding
Lsqua2410	GO:0008152 metabolic process		GO:0016787 hydrolase activity
Lsqua2411	GO:0055114 oxidation-reduction process	GO:0022626 cytosolic ribosome | GO:0005773 vacuole | GO:0016021 integral to membrane	GO:0000293 ferric-chelate reductase activity | GO:0050664 oxidoreductase activity, acting on NADH or NADPH, oxygen as acceptor | GO:0005509 calcium ion binding | GO:0004601 peroxidase activity
Lsqua2412	GO:0016310 phosphorylation		GO:0016301 kinase activity
Lsqua2414			GO:0008270 zinc ion binding
Lsqua2415	GO:0006637 acyl-CoA metabolic process		GO:0016290 palmitoyl-CoA hydrolase activity
Lsqua2416	GO:0006355 regulation of transcription, DNA-dependent	GO:0000785 chromatin | GO:0005634 nucleus	GO:0003677 DNA binding
Lsqua2418			GO:0046872 metal ion binding
Lsqua2420	GO:0006468 protein phosphorylation		GO:0005524 ATP binding | GO:0004674 protein serine/threonine kinase activity
Lsqua2423	GO:0006334 nucleosome assembly	GO:0000786 nucleosome | GO:0005634 nucleus	GO:0003677 DNA binding | GO:0046982 protein heterodimerization activity
Lsqua2425	GO:0006396 RNA processing	GO:0030529 ribonucleoprotein complex | GO:0005634 nucleus	GO:0003723 RNA binding | GO:0000166 nucleotide binding
Lsqua2432	GO:0008152 metabolic process		GO:0016787 hydrolase activity
Lsqua2433	GO:0006468 protein phosphorylation		GO:0005524 ATP binding | GO:0004674 protein serine/threonine kinase activity
Lsqua2434	GO:0045859 regulation of protein kinase activity | GO:0051301 cell division | GO:0055085 transmembrane transport | GO:0006200 ATP catabolic process | GO:0007049 cell cycle	GO:0016021 integral to membrane	GO:0016301 kinase activity | GO:0016538 cyclin-dependent protein kinase regulator activity | GO:0042626 ATPase activity, coupled to transmembrane movement of substances | GO:0005524 ATP binding
Lsqua2435	GO:0055085 transmembrane transport | GO:0006200 ATP catabolic process	GO:0016021 integral to membrane	GO:0042626 ATPase activity, coupled to transmembrane movement of substances | GO:0005524 ATP binding
Lsqua2436		GO:0016021 integral to membrane	GO:0005509 calcium ion binding
Lsqua2437	GO:0055085 transmembrane transport	GO:0016020 membrane	GO:0005215 transporter activity
Lsqua2440	GO:0006357 regulation of transcription from RNA polymerase II promoter	GO:0005634 nucleus	GO:0051536 iron-sulfur cluster binding | GO:0008270 zinc ion binding | GO:0000981 sequence-specific DNA binding RNA polymerase II transcription factor activity | GO:0003677 DNA binding
Lsqua2441	GO:0006357 regulation of transcription from RNA polymerase II promoter	GO:0005634 nucleus	GO:0051536 iron-sulfur cluster binding | GO:0008270 zinc ion binding | GO:0000981 sequence-specific DNA binding RNA polymerase II transcription factor activity | GO:0003677 DNA binding
Lsqua2442	GO:0055114 oxidation-reduction process		GO:0020037 heme binding | GO:0016705 oxidoreductase activity, acting on paired donors, with incorporation or reduction of molecular oxygen | GO:0004497 monooxygenase activity | GO:0005506 iron ion binding
Lsqua2443	GO:0032259 methylation		GO:0008168 methyltransferase activity
Lsqua2444	GO:0032259 methylation		GO:0008168 methyltransferase activity
Lsqua2445	GO:0007165 signal transduction | GO:0046847 filopodium assembly		GO:0017124 SH3 domain binding | GO:0008093 cytoskeletal adaptor activity
Lsqua2446	GO:0055114 oxidation-reduction process	GO:0005622 intracellular	GO:0020037 heme binding | GO:0046872 metal ion binding | GO:0000104 succinate dehydrogenase activity
Lsqua2447	GO:0015031 protein transport | GO:0050790 regulation of catalytic activity		GO:0005093 Rab GDP-dissociation inhibitor activity
Lsqua2448	GO:0007264 small GTPase mediated signal transduction | GO:0006913 nucleocytoplasmic transport | GO:0006184 GTP catabolic process | GO:0006886 intracellular protein transport		GO:0003924 GTPase activity | GO:0005525 GTP binding
Lsqua2449	GO:0006184 GTP catabolic process | GO:0007186 G-protein coupled receptor signaling pathway		GO:0004871 signal transducer activity | GO:0031683 G-protein beta/gamma-subunit complex binding | GO:0003924 GTPase activity | GO:0005525 GTP binding
Lsqua2450	GO:0008152 metabolic process		GO:0016787 hydrolase activity
Lsqua2451	GO:0055085 transmembrane transport	GO:0016021 integral to membrane	GO:0005509 calcium ion binding
Lsqua2452	GO:0006457 protein folding | GO:0006950 response to stress	GO:0005737 cytoplasm	GO:0005524 ATP binding
Lsqua2453	GO:0008152 metabolic process		GO:0003824 catalytic activity
Lsqua2458	GO:0008152 metabolic process		GO:0016787 hydrolase activity
Lsqua2459	GO:0055114 oxidation-reduction process | GO:0051726 regulation of cell cycle | GO:0006284 base-excision repair | GO:0000737 DNA catabolic process, endonucleolytic | GO:0009926 auxin polar transport | GO:0045454 cell redox homeostasis | GO:0009408 response to heat | GO:0072593 reactive oxygen species metabolic process	GO:0005829 cytosol	GO:0046872 metal ion binding | GO:0003906 DNA-(apurinic or apyrimidinic site) lyase activity | GO:0009055 electron carrier activity | GO:0003677 DNA binding | GO:0051539 4 iron, 4 sulfur cluster binding | GO:0019104 DNA N-glycosylase activity | GO:0015035 protein disulfide oxidoreductase activity
Lsqua2460	GO:0055085 transmembrane transport	GO:0016021 integral to membrane	GO:0005215 transporter activity
Lsqua2461	GO:0006508 proteolysis		GO:0004177 aminopeptidase activity
Lsqua2462	GO:0008152 metabolic process		GO:0003824 catalytic activity
Lsqua2466	GO:0006468 protein phosphorylation | GO:0007018 microtubule-based movement	GO:0005874 microtubule	GO:0003777 microtubule motor activity | GO:0008017 microtubule binding | GO:0004672 protein kinase activity | GO:0005524 ATP binding
Lsqua2468	GO:0023014 signal transduction via phosphorylation event | GO:0035556 intracellular signal transduction | GO:0000160 two-component signal transduction system (phosphorelay)	GO:0016020 membrane	GO:0000155 two-component sensor activity | GO:0005524 ATP binding | GO:0000156 two-component response regulator activity
Lsqua2469	GO:0055085 transmembrane transport	GO:0005743 mitochondrial inner membrane | GO:0016021 integral to membrane
Lsqua2472	GO:0000160 two-component signal transduction system (phosphorelay) | GO:0006355 regulation of transcription, DNA-dependent | GO:0023014 signal transduction via phosphorylation event		GO:0008270 zinc ion binding | GO:0043565 sequence-specific DNA binding | GO:0003700 sequence-specific DNA binding transcription factor activity | GO:0000155 two-component sensor activity
Lsqua2473	GO:0006094 gluconeogenesis		GO:0004736 pyruvate carboxylase activity | GO:0046872 metal ion binding | GO:0003677 DNA binding | GO:0005524 ATP binding | GO:0004075 biotin carboxylase activity
Lsqua2474	GO:0006094 gluconeogenesis		GO:0004736 pyruvate carboxylase activity | GO:0046872 metal ion binding | GO:0003677 DNA binding | GO:0005524 ATP binding | GO:0004075 biotin carboxylase activity
Lsqua2475	GO:0008152 metabolic process		GO:0003824 catalytic activity
Lsqua2476	GO:0016310 phosphorylation	GO:0005737 cytoplasm | GO:0016021 integral to membrane	GO:0016773 phosphotransferase activity, alcohol group as acceptor | GO:0016301 kinase activity | GO:0005524 ATP binding
Lsqua2477	GO:0008152 metabolic process		GO:0016740 transferase activity
Lsqua2478	GO:0008152 metabolic process		GO:0016787 hydrolase activity
Lsqua2479	GO:0006099 tricarboxylic acid cycle		GO:0000104 succinate dehydrogenase activity | GO:0009055 electron carrier activity | GO:0051537 2 iron, 2 sulfur cluster binding
Lsqua2480	GO:0006099 tricarboxylic acid cycle		GO:0051287 NAD binding | GO:0004449 isocitrate dehydrogenase (NAD+) activity | GO:0000287 magnesium ion binding
Lsqua2482	GO:0045980 negative regulation of nucleotide metabolic process | GO:0043086 negative regulation of catalytic activity	GO:0005739 mitochondrion	GO:0004857 enzyme inhibitor activity
Lsqua2483	GO:0055114 oxidation-reduction process		GO:0020037 heme binding | GO:0004497 monooxygenase activity | GO:0005506 iron ion binding | GO:0016706 oxidoreductase activity, acting on paired donors, with incorporation or reduction of molecular oxygen, 2-oxoglutarate as one donor, and incorporation of one atom each of oxygen into both donors
Lsqua2485	GO:0006750 glutathione biosynthetic process		GO:0005524 ATP binding | GO:0004363 glutathione synthase activity
Lsqua2486	GO:0006357 regulation of transcription from RNA polymerase II promoter | GO:0032784 regulation of transcription elongation, DNA-dependent | GO:0006414 translational elongation		GO:0003746 translation elongation factor activity | GO:0016788 hydrolase activity, acting on ester bonds | GO:0003677 DNA binding
Lsqua2487	GO:0016311 dephosphorylation | GO:0046854 phosphatidylinositol phosphorylation | GO:0006790 sulfur compound metabolic process		GO:0008441 3'(2'),5'-bisphosphate nucleotidase activity
Lsqua2488	GO:0030163 protein catabolic process | GO:0006508 proteolysis | GO:0051301 cell division	GO:0005737 cytoplasm | GO:0000502 proteasome complex	GO:0008233 peptidase activity | GO:0005524 ATP binding | GO:0017111 nucleoside-triphosphatase activity
Lsqua2489			GO:0003723 RNA binding
Lsqua2491	GO:0006357 regulation of transcription from RNA polymerase II promoter	GO:0005634 nucleus	GO:0008270 zinc ion binding | GO:0000981 sequence-specific DNA binding RNA polymerase II transcription factor activity | GO:0003677 DNA binding
Lsqua2493	GO:0005975 carbohydrate metabolic process		GO:0004553 hydrolase activity, hydrolyzing O-glycosyl compounds
Lsqua2494			GO:0005509 calcium ion binding
Lsqua2496	GO:0008152 metabolic process		GO:0005524 ATP binding | GO:0004386 helicase activity | GO:0003677 DNA binding
Lsqua2497	GO:0008152 metabolic process | GO:0000160 two-component signal transduction system (phosphorelay)		GO:0004871 signal transducer activity | GO:0016740 transferase activity
Lsqua2498	GO:0016310 phosphorylation | GO:0000160 two-component signal transduction system (phosphorelay)		GO:0016301 kinase activity | GO:0004871 signal transducer activity
Lsqua2500	GO:0006355 regulation of transcription, DNA-dependent	GO:0005634 nucleus	GO:0003700 sequence-specific DNA binding transcription factor activity | GO:0000976 transcription regulatory region sequence-specific DNA binding
Lsqua2510	GO:0003333 amino acid transmembrane transport | GO:0006184 GTP catabolic process	GO:0016021 integral to membrane	GO:0015171 amino acid transmembrane transporter activity | GO:0003924 GTPase activity | GO:0005525 GTP binding
Lsqua2512	GO:0055085 transmembrane transport | GO:0006200 ATP catabolic process	GO:0016021 integral to membrane	GO:0042626 ATPase activity, coupled to transmembrane movement of substances | GO:0005524 ATP binding
Lsqua2513	GO:0055085 transmembrane transport | GO:0006200 ATP catabolic process	GO:0016021 integral to membrane	GO:0042626 ATPase activity, coupled to transmembrane movement of substances | GO:0005524 ATP binding
Lsqua2514	GO:0055114 oxidation-reduction process		GO:0004766 spermidine synthase activity | GO:0004755 saccharopine dehydrogenase (NADP+, L-glutamate-forming) activity
Lsqua2516	GO:0022900 electron transport chain | GO:0006099 tricarboxylic acid cycle		GO:0050660 flavin adenine dinucleotide binding | GO:0008177 succinate dehydrogenase (ubiquinone) activity
Lsqua2517	GO:0055114 oxidation-reduction process		GO:0016491 oxidoreductase activity
Lsqua2521	GO:0006260 DNA replication	GO:0005634 nucleus
Lsqua2523	GO:0006807 nitrogen compound metabolic process | GO:0016310 phosphorylation		GO:0016301 kinase activity | GO:0004356 glutamate-ammonia ligase activity
Lsqua2526	GO:0007165 signal transduction	GO:0016021 integral to membrane	GO:0008158 hedgehog receptor activity
Lsqua2527	GO:0008104 protein localization
Lsqua2530	GO:0006413 translational initiation | GO:0006289 nucleotide-excision repair | GO:0006351 transcription, DNA-dependent	GO:0000439 core TFIIH complex	GO:0003743 translation initiation factor activity | GO:0008270 zinc ion binding
Lsqua2531	GO:0006357 regulation of transcription from RNA polymerase II promoter	GO:0005634 nucleus	GO:0008270 zinc ion binding | GO:0000981 sequence-specific DNA binding RNA polymerase II transcription factor activity | GO:0003677 DNA binding
Lsqua2532	GO:0046854 phosphatidylinositol phosphorylation | GO:0006661 phosphatidylinositol biosynthetic process | GO:0048015 phosphatidylinositol-mediated signaling		GO:0004430 1-phosphatidylinositol 4-kinase activity
Lsqua2533	GO:0055114 oxidation-reduction process		GO:0020037 heme binding | GO:0016705 oxidoreductase activity, acting on paired donors, with incorporation or reduction of molecular oxygen | GO:0004497 monooxygenase activity | GO:0005506 iron ion binding
Lsqua2534	GO:0008152 metabolic process		GO:0016787 hydrolase activity
Lsqua2536	GO:0001510 RNA methylation | GO:0006334 nucleosome assembly	GO:0000786 nucleosome | GO:0005634 nucleus	GO:0003677 DNA binding | GO:0046982 protein heterodimerization activity | GO:0008168 methyltransferase activity
Lsqua2537	GO:0030466 chromatin silencing at silent mating-type cassette | GO:0016567 protein ubiquitination | GO:0008298 intracellular mRNA localization | GO:0070478 nuclear-transcribed mRNA catabolic process, 3'-5' exonucleolytic nonsense-mediated decay	GO:0005737 cytoplasm	GO:0008270 zinc ion binding | GO:0003677 DNA binding | GO:0005524 ATP binding | GO:0004386 helicase activity
Lsqua2538	GO:0006357 regulation of transcription from RNA polymerase II promoter	GO:0005634 nucleus	GO:0008270 zinc ion binding | GO:0003676 nucleic acid binding | GO:0000981 sequence-specific DNA binding RNA polymerase II transcription factor activity
Lsqua2539	GO:0032508 DNA duplex unwinding | GO:0006289 nucleotide-excision repair		GO:0003677 DNA binding | GO:0004003 ATP-dependent DNA helicase activity | GO:0005524 ATP binding
Lsqua2540	GO:0034314 Arp2/3 complex-mediated actin nucleation | GO:0006351 transcription, DNA-dependent	GO:0005885 Arp2/3 protein complex | GO:0005634 nucleus	GO:0008270 zinc ion binding | GO:0003677 DNA binding | GO:0005524 ATP binding
Lsqua2541			GO:0003779 actin binding
Lsqua2542			GO:0035091 phosphatidylinositol binding
Lsqua2544	GO:0006457 protein folding | GO:0006412 translation | GO:0051259 protein oligomerization | GO:0006200 ATP catabolic process	GO:0005840 ribosome	GO:0051087 chaperone binding | GO:0008026 ATP-dependent helicase activity | GO:0003676 nucleic acid binding | GO:0003735 structural constituent of ribosome | GO:0005524 ATP binding
Lsqua2545	GO:0006260 DNA replication	GO:0005739 mitochondrion	GO:0003697 single-stranded DNA binding
Lsqua2546			GO:0046872 metal ion binding
Lsqua2547	GO:0008152 metabolic process	GO:0016020 membrane	GO:0003824 catalytic activity
Lsqua2548	GO:0055114 oxidation-reduction process		GO:0016787 hydrolase activity | GO:0008270 zinc ion binding | GO:0016491 oxidoreductase activity
Lsqua2549	GO:0055114 oxidation-reduction process		GO:0020037 heme binding | GO:0016705 oxidoreductase activity, acting on paired donors, with incorporation or reduction of molecular oxygen | GO:0004497 monooxygenase activity | GO:0005506 iron ion binding
Lsqua2550	GO:0043458 ethanol biosynthetic process involved in glucose fermentation to ethanol | GO:0006068 ethanol catabolic process | GO:0006567 threonine catabolic process	GO:0005622 intracellular	GO:0008270 zinc ion binding | GO:0004022 alcohol dehydrogenase (NAD) activity | GO:0008926 mannitol-1-phosphate 5-dehydrogenase activity | GO:0000166 nucleotide binding
Lsqua2551	GO:0006468 protein phosphorylation		GO:0005524 ATP binding | GO:0004674 protein serine/threonine kinase activity
Lsqua2552			GO:0008270 zinc ion binding
Lsqua2553	GO:0006886 intracellular protein transport	GO:0005622 intracellular
Lsqua2554	GO:0000398 nuclear mRNA splicing, via spliceosome	GO:0019013 viral nucleocapsid | GO:0030529 ribonucleoprotein complex	GO:0017069 snRNA binding | GO:0000166 nucleotide binding
Lsqua2556	GO:0015940 pantothenate biosynthetic process | GO:0032259 methylation	GO:0005737 cytoplasm	GO:0003864 3-methyl-2-oxobutanoate hydroxymethyltransferase activity | GO:0046872 metal ion binding | GO:0008168 methyltransferase activity
Lsqua2557	GO:0006869 lipid transport | GO:0006468 protein phosphorylation		GO:0005319 lipid transporter activity | GO:0004672 protein kinase activity | GO:0005524 ATP binding
Lsqua2558	GO:0005975 carbohydrate metabolic process		GO:0008270 zinc ion binding | GO:0016832 aldehyde-lyase activity
Lsqua2559	GO:0006801 superoxide metabolic process | GO:0055114 oxidation-reduction process		GO:0046872 metal ion binding | GO:0004784 superoxide dismutase activity
Lsqua2561	GO:0030488 tRNA methylation		GO:0008175 tRNA methyltransferase activity
Lsqua2562		GO:0005634 nucleus	GO:0003677 DNA binding
Lsqua2563	GO:0006289 nucleotide-excision repair	GO:0005634 nucleus	GO:0003684 damaged DNA binding
Lsqua2564	GO:0006200 ATP catabolic process		GO:0005524 ATP binding | GO:0016887 ATPase activity
Lsqua2566	GO:0046952 ketone body catabolic process	GO:0005739 mitochondrion	GO:0008260 3-oxoacid CoA-transferase activity
Lsqua2567	GO:0006355 regulation of transcription, DNA-dependent	GO:0005634 nucleus	GO:0003700 sequence-specific DNA binding transcription factor activity | GO:0043565 sequence-specific DNA binding
Lsqua2568	GO:0006464 protein modification process		GO:0004835 tubulin-tyrosine ligase activity | GO:0016787 hydrolase activity | GO:0005524 ATP binding
Lsqua2570	GO:0006071 glycerol metabolic process | GO:0006629 lipid metabolic process		GO:0008889 glycerophosphodiester phosphodiesterase activity
Lsqua2571	GO:0006071 glycerol metabolic process | GO:0006629 lipid metabolic process		GO:0008889 glycerophosphodiester phosphodiesterase activity
Lsqua2572	GO:0006412 translation	GO:0015934 large ribosomal subunit	GO:0003735 structural constituent of ribosome
Lsqua2576	GO:0032259 methylation		GO:0008168 methyltransferase activity
Lsqua2577	GO:0009113 purine base biosynthetic process | GO:0006189 'de novo' IMP biosynthetic process	GO:0005737 cytoplasm	GO:0046872 metal ion binding | GO:0005524 ATP binding | GO:0004637 phosphoribosylamine-glycine ligase activity | GO:0004641 phosphoribosylformylglycinamidine cyclo-ligase activity
Lsqua2578	GO:0009414 response to water deprivation | GO:0010200 response to chitin | GO:0051865 protein autoubiquitination | GO:0009737 response to abscisic acid stimulus	GO:0005618 cell wall | GO:0005737 cytoplasm | GO:0005634 nucleus	GO:0008270 zinc ion binding | GO:0004842 ubiquitin-protein ligase activity
Lsqua2580			GO:0005509 calcium ion binding
Lsqua2581			GO:0020037 heme binding
Lsqua2582	GO:0055114 oxidation-reduction process		GO:0016491 oxidoreductase activity
Lsqua2583	GO:0008152 metabolic process		GO:0016757 transferase activity, transferring glycosyl groups
Lsqua2584	GO:0008152 metabolic process		GO:0016810 hydrolase activity, acting on carbon-nitrogen (but not peptide) bonds
Lsqua2586	GO:0006508 proteolysis		GO:0004185 serine-type carboxypeptidase activity
Lsqua2591	GO:0008152 metabolic process		GO:0016874 ligase activity
Lsqua2592	GO:0045454 cell redox homeostasis | GO:0008152 metabolic process		GO:0016740 transferase activity
Lsqua2593	GO:0008152 metabolic process		GO:0016757 transferase activity, transferring glycosyl groups
Lsqua2596	GO:0055085 transmembrane transport | GO:0006200 ATP catabolic process	GO:0016021 integral to membrane	GO:0042626 ATPase activity, coupled to transmembrane movement of substances | GO:0005524 ATP binding
Lsqua2597	GO:0055085 transmembrane transport	GO:0016021 integral to membrane
Lsqua2602	GO:0016310 phosphorylation | GO:0007205 activation of protein kinase C activity by G-protein coupled receptor protein signaling pathway		GO:0003951 NAD+ kinase activity | GO:0003676 nucleic acid binding | GO:0004143 diacylglycerol kinase activity
Lsqua2606	GO:0055085 transmembrane transport	GO:0016021 integral to membrane
Lsqua2609	GO:0008152 metabolic process		GO:0016787 hydrolase activity
Lsqua2611	GO:0006412 translation	GO:0005840 ribosome	GO:0003735 structural constituent of ribosome
Lsqua2612	GO:0055114 oxidation-reduction process | GO:0034599 cellular response to oxidative stress	GO:0005737 cytoplasm | GO:0005634 nucleus	GO:0008379 thioredoxin peroxidase activity
Lsqua2613	GO:0006413 translational initiation | GO:0016310 phosphorylation		GO:0016301 kinase activity | GO:0003743 translation initiation factor activity | GO:0008270 zinc ion binding
Lsqua2614	GO:0006412 translation	GO:0015935 small ribosomal subunit	GO:0003735 structural constituent of ribosome | GO:0003723 RNA binding
Lsqua2615			GO:0008270 zinc ion binding | GO:0003676 nucleic acid binding
Lsqua2616	GO:0008152 metabolic process | GO:0055085 transmembrane transport	GO:0016021 integral to membrane	GO:0004792 thiosulfate sulfurtransferase activity
Lsqua2617	GO:0043161 proteasomal ubiquitin-dependent protein catabolic process | GO:0006289 nucleotide-excision repair	GO:0005634 nucleus	GO:0003684 damaged DNA binding
Lsqua2618	GO:0006457 protein folding	GO:0016272 prefoldin complex	GO:0051082 unfolded protein binding | GO:0051087 chaperone binding
Lsqua2619			GO:0046872 metal ion binding
Lsqua2620	GO:0006633 fatty acid biosynthetic process | GO:0055114 oxidation-reduction process		GO:0016717 oxidoreductase activity, acting on paired donors, with oxidation of a pair of donors resulting in the reduction of molecular oxygen to two molecules of water | GO:0005506 iron ion binding | GO:0020037 heme binding
Lsqua2622	GO:0031929 TOR signaling cascade | GO:0006412 translation	GO:0015934 large ribosomal subunit | GO:0031932 TORC2 complex	GO:0003735 structural constituent of ribosome
Lsqua2623	GO:0005975 carbohydrate metabolic process		GO:0016810 hydrolase activity, acting on carbon-nitrogen (but not peptide) bonds | GO:0008061 chitin binding
Lsqua2624	GO:0009058 biosynthetic process | GO:0032259 methylation		GO:0003779 actin binding | GO:0016742 hydroxymethyl-, formyl- and related transferase activity | GO:0008168 methyltransferase activity
Lsqua2625	GO:0006810 transport	GO:0016021 integral to membrane	GO:0008270 zinc ion binding
Lsqua2627	GO:0032508 DNA duplex unwinding | GO:0006310 DNA recombination | GO:0006281 DNA repair | GO:0006355 regulation of transcription, DNA-dependent	GO:0071339 MLL1 complex | GO:0000812 Swr1 complex	GO:0005524 ATP binding | GO:0043141 ATP-dependent 5'-3' DNA helicase activity
Lsqua2634	GO:0016311 dephosphorylation	GO:0005737 cytoplasm | GO:0005634 nucleus	GO:0004721 phosphoprotein phosphatase activity
Lsqua2635	GO:0016311 dephosphorylation	GO:0005737 cytoplasm | GO:0005634 nucleus	GO:0004721 phosphoprotein phosphatase activity
Lsqua2636		GO:0005737 cytoplasm
Lsqua2637	GO:0006508 proteolysis		GO:0004180 carboxypeptidase activity
Lsqua2638	GO:0008152 metabolic process		GO:0016787 hydrolase activity
Lsqua2639	GO:0055114 oxidation-reduction process		GO:0046872 metal ion binding | GO:0051539 4 iron, 4 sulfur cluster binding | GO:0048038 quinone binding | GO:0008137 NADH dehydrogenase (ubiquinone) activity
Lsqua2641	GO:0055114 oxidation-reduction process		GO:0016491 oxidoreductase activity
Lsqua2642	GO:0006508 proteolysis	GO:0016021 integral to membrane	GO:0004252 serine-type endopeptidase activity
Lsqua2643	GO:0006412 translation	GO:0005840 ribosome	GO:0003735 structural constituent of ribosome
Lsqua2644	GO:0018279 protein N-linked glycosylation via asparagine | GO:0006351 transcription, DNA-dependent	GO:0005789 endoplasmic reticulum membrane	GO:0003899 DNA-directed RNA polymerase activity | GO:0003677 DNA binding | GO:0046983 protein dimerization activity | GO:0004579 dolichyl-diphosphooligosaccharide-protein glycotransferase activity
Lsqua2645	GO:0055114 oxidation-reduction process	GO:0016020 membrane	GO:0016491 oxidoreductase activity
Lsqua2646	GO:0006468 protein phosphorylation		GO:0005524 ATP binding | GO:0004674 protein serine/threonine kinase activity
Lsqua2648	GO:0016192 vesicle-mediated transport | GO:0006886 intracellular protein transport	GO:0030131 clathrin adaptor complex
Lsqua2649	GO:0006457 protein folding | GO:0000413 protein peptidyl-prolyl isomerization		GO:0003755 peptidyl-prolyl cis-trans isomerase activity
Lsqua2650	GO:0006355 regulation of transcription, DNA-dependent	GO:0005634 nucleus	GO:0003700 sequence-specific DNA binding transcription factor activity | GO:0043565 sequence-specific DNA binding
Lsqua2651	GO:0055114 oxidation-reduction process		GO:0050660 flavin adenine dinucleotide binding | GO:0008762 UDP-N-acetylmuramate dehydrogenase activity
Lsqua2652	GO:0006520 cellular amino acid metabolic process	GO:0005739 mitochondrion	GO:0030170 pyridoxal phosphate binding | GO:0004794 L-threonine ammonia-lyase activity | GO:0003941 L-serine ammonia-lyase activity
Lsqua2653	GO:0006520 cellular amino acid metabolic process	GO:0005739 mitochondrion	GO:0030170 pyridoxal phosphate binding | GO:0004794 L-threonine ammonia-lyase activity | GO:0003941 L-serine ammonia-lyase activity
Lsqua2655			GO:0051537 2 iron, 2 sulfur cluster binding | GO:0046872 metal ion binding | GO:0009055 electron carrier activity
Lsqua2656	GO:0000165 MAPKKK cascade | GO:0006468 protein phosphorylation		GO:0004707 MAP kinase activity | GO:0005524 ATP binding
Lsqua2657	GO:0000165 MAPKKK cascade | GO:0006468 protein phosphorylation		GO:0004707 MAP kinase activity | GO:0005524 ATP binding
Lsqua2658			GO:0046983 protein dimerization activity | GO:0003677 DNA binding
Lsqua2659	GO:0019236 response to pheromone | GO:0007186 G-protein coupled receptor signaling pathway	GO:0016021 integral to membrane	GO:0004934 mating-type alpha-factor pheromone receptor activity
Lsqua2660			GO:0008270 zinc ion binding
Lsqua2663	GO:0008152 metabolic process		GO:0003824 catalytic activity
Lsqua2664	GO:0006457 protein folding | GO:0031929 TOR signaling cascade | GO:0000413 protein peptidyl-prolyl isomerization	GO:0005737 cytoplasm | GO:0016020 membrane	GO:0005528 FK506 binding | GO:0003755 peptidyl-prolyl cis-trans isomerase activity
Lsqua2665	GO:0000413 protein peptidyl-prolyl isomerization | GO:0006457 protein folding | GO:0031929 TOR signaling cascade | GO:0006325 chromatin organization | GO:0009092 homoserine metabolic process	GO:0005739 mitochondrion | GO:0016020 membrane | GO:0005634 nucleus	GO:0003755 peptidyl-prolyl cis-trans isomerase activity | GO:0005528 FK506 binding
Lsqua2666	GO:0007165 signal transduction | GO:0006289 nucleotide-excision repair	GO:0005634 nucleus	GO:0004871 signal transducer activity | GO:0003684 damaged DNA binding
Lsqua2667	GO:0006508 proteolysis		GO:0004252 serine-type endopeptidase activity
Lsqua2668	GO:0006352 transcription initiation, DNA-dependent | GO:0006261 DNA-dependent DNA replication | GO:0016310 phosphorylation | GO:0006355 regulation of transcription, DNA-dependent | GO:2000601 positive regulation of Arp2/3 complex-mediated actin nucleation | GO:0006897 endocytosis | GO:0006935 chemotaxis | GO:0000160 two-component signal transduction system (phosphorelay) | GO:0009267 cellular res…	GO:0009360 DNA polymerase III complex	GO:0016301 kinase activity | GO:0017111 nucleoside-triphosphatase activity | GO:0003887 DNA-directed DNA polymerase activity | GO:0016987 sigma factor activity | GO:0004651 polynucleotide 5'-phosphatase activity | GO:0003779 actin binding | GO:0003677 DNA binding | GO:0003700 sequence-specific DNA binding transcription factor activity | GO:0000156 two-component response regulator activity | GO:00…
Lsqua2670	GO:0006412 translation	GO:0005840 ribosome	GO:0003735 structural constituent of ribosome | GO:0000166 nucleotide binding
Lsqua2672	GO:0055085 transmembrane transport | GO:0006200 ATP catabolic process	GO:0016021 integral to membrane	GO:0042626 ATPase activity, coupled to transmembrane movement of substances | GO:0005524 ATP binding
Lsqua2673	GO:0055085 transmembrane transport | GO:0006200 ATP catabolic process	GO:0016021 integral to membrane	GO:0042626 ATPase activity, coupled to transmembrane movement of substances | GO:0005524 ATP binding
Lsqua2674	GO:0006357 regulation of transcription from RNA polymerase II promoter	GO:0005634 nucleus	GO:0008270 zinc ion binding | GO:0000981 sequence-specific DNA binding RNA polymerase II transcription factor activity | GO:0003677 DNA binding
Lsqua2678		GO:0005634 nucleus	GO:0003677 DNA binding
Lsqua2679			GO:0000166 nucleotide binding
Lsqua2680	GO:0030447 filamentous growth | GO:0055114 oxidation-reduction process	GO:0005739 mitochondrion	GO:0050660 flavin adenine dinucleotide binding | GO:0008762 UDP-N-acetylmuramate dehydrogenase activity | GO:0003779 actin binding | GO:0004458 D-lactate dehydrogenase (cytochrome) activity
Lsqua2682	GO:0032319 regulation of Rho GTPase activity		GO:0005089 Rho guanyl-nucleotide exchange factor activity
Lsqua2683	GO:0009088 threonine biosynthetic process | GO:0009086 methionine biosynthetic process | GO:0055114 oxidation-reduction process | GO:0009089 lysine biosynthetic process via diaminopimelate | GO:0009097 isoleucine biosynthetic process | GO:0006531 aspartate metabolic process	GO:0005737 cytoplasm	GO:0051287 NAD binding | GO:0004073 aspartate-semialdehyde dehydrogenase activity | GO:0003942 N-acetyl-gamma-glutamyl-phosphate reductase activity | GO:0046983 protein dimerization activity | GO:0050661 NADP binding
Lsqua2684	GO:0009088 threonine biosynthetic process | GO:0009086 methionine biosynthetic process | GO:0055114 oxidation-reduction process | GO:0009089 lysine biosynthetic process via diaminopimelate | GO:0009097 isoleucine biosynthetic process | GO:0006531 aspartate metabolic process	GO:0005737 cytoplasm	GO:0051287 NAD binding | GO:0004073 aspartate-semialdehyde dehydrogenase activity | GO:0003942 N-acetyl-gamma-glutamyl-phosphate reductase activity | GO:0046983 protein dimerization activity | GO:0050661 NADP binding
Lsqua2685	GO:0030488 tRNA methylation | GO:0055114 oxidation-reduction process	GO:0005634 nucleus	GO:0004497 monooxygenase activity | GO:0008168 methyltransferase activity
Lsqua2687	GO:0044237 cellular metabolic process | GO:0055114 oxidation-reduction process | GO:0006012 galactose metabolic process		GO:0016491 oxidoreductase activity | GO:0050662 coenzyme binding | GO:0003978 UDP-glucose 4-epimerase activity
Lsqua2688	GO:0030488 tRNA methylation | GO:0006979 response to oxidative stress | GO:0055114 oxidation-reduction process		GO:0004809 tRNA (guanine-N2-)-methyltransferase activity | GO:0003723 RNA binding | GO:0020037 heme binding | GO:0004096 catalase activity
Lsqua2689	GO:0008380 RNA splicing	GO:0005681 spliceosomal complex
Lsqua2690	GO:0055114 oxidation-reduction process		GO:0016491 oxidoreductase activity
Lsqua2691	GO:0006096 glycolysis | GO:0006094 gluconeogenesis		GO:0004347 glucose-6-phosphate isomerase activity
Lsqua2692	GO:0006200 ATP catabolic process		GO:0003676 nucleic acid binding | GO:0008026 ATP-dependent helicase activity | GO:0005199 structural constituent of cell wall | GO:0005524 ATP binding
Lsqua2695	GO:0006355 regulation of transcription, DNA-dependent | GO:0005975 carbohydrate metabolic process | GO:0006352 transcription initiation, DNA-dependent		GO:0003700 sequence-specific DNA binding transcription factor activity | GO:0003677 DNA binding | GO:0016787 hydrolase activity | GO:0016987 sigma factor activity
Lsqua2696	GO:0007165 signal transduction	GO:0005622 intracellular
Lsqua2697	GO:0008152 metabolic process	GO:0005871 kinesin complex	GO:0051087 chaperone binding | GO:0043531 ADP binding | GO:0003777 microtubule motor activity
Lsqua2698	GO:0055114 oxidation-reduction process	GO:0016021 integral to membrane	GO:0016491 oxidoreductase activity
Lsqua2700	GO:0006468 protein phosphorylation		GO:0004672 protein kinase activity | GO:0005524 ATP binding
Lsqua2701	GO:0006468 protein phosphorylation		GO:0004672 protein kinase activity | GO:0005524 ATP binding
Lsqua2703	GO:0006412 translation	GO:0005840 ribosome	GO:0003735 structural constituent of ribosome
Lsqua2704	GO:0006508 proteolysis		GO:0046872 metal ion binding | GO:0008237 metallopeptidase activity | GO:0004177 aminopeptidase activity
Lsqua2705	GO:0055114 oxidation-reduction process	GO:0000502 proteasome complex	GO:0003995 acyl-CoA dehydrogenase activity
Lsqua2706		GO:0000502 proteasome complex
Lsqua2712	GO:0040035 hermaphrodite genitalia development | GO:0002119 nematode larval development | GO:0040039 inductive cell migration | GO:0006898 receptor-mediated endocytosis | GO:0006886 intracellular protein transport | GO:0009792 embryo development ending in birth or egg hatching | GO:0016246 RNA interference	GO:0005634 nucleus	GO:0008536 Ran GTPase binding
Lsqua2714			GO:0005524 ATP binding
Lsqua2716	GO:0055085 transmembrane transport	GO:0005743 mitochondrial inner membrane | GO:0016021 integral to membrane
Lsqua2717	GO:0006094 gluconeogenesis | GO:0016311 dephosphorylation | GO:0072593 reactive oxygen species metabolic process	GO:0005829 cytosol	GO:0042132 fructose 1,6-bisphosphate 1-phosphatase activity
Lsqua2719	GO:0055085 transmembrane transport	GO:0016021 integral to membrane
Lsqua2720	GO:0008152 metabolic process | GO:0010099 regulation of photomorphogenesis		GO:0016881 acid-amino acid ligase activity
Lsqua2721	GO:0000398 nuclear mRNA splicing, via spliceosome		GO:0017069 snRNA binding | GO:0000166 nucleotide binding
Lsqua2722	GO:0045332 phospholipid translocation | GO:0008152 metabolic process | GO:0006812 cation transport	GO:0016021 integral to membrane	GO:0019829 cation-transporting ATPase activity | GO:0005524 ATP binding | GO:0000287 magnesium ion binding | GO:0004012 phospholipid-translocating ATPase activity
Lsqua2724	GO:0006200 ATP catabolic process		GO:0005524 ATP binding | GO:0016887 ATPase activity
Lsqua2725		GO:0016021 integral to membrane
Lsqua2727	GO:0042254 ribosome biogenesis
Lsqua2728	GO:0008152 metabolic process		GO:0003824 catalytic activity
Lsqua2736	GO:0005975 carbohydrate metabolic process		GO:0016810 hydrolase activity, acting on carbon-nitrogen (but not peptide) bonds
Lsqua2739	GO:0008152 metabolic process		GO:0033939 xylan alpha-1,2-glucuronosidase activity
Lsqua2741	GO:0006412 translation	GO:0005840 ribosome	GO:0008097 5S rRNA binding | GO:0003735 structural constituent of ribosome
Lsqua2743	GO:0006886 intracellular protein transport	GO:0005634 nucleus	GO:0008536 Ran GTPase binding
Lsqua2744			GO:0051087 chaperone binding
Lsqua2747	GO:0006355 regulation of transcription, DNA-dependent	GO:0005634 nucleus	GO:0016747 transferase activity, transferring acyl groups other than amino-acyl groups
Lsqua2748	GO:0006413 translational initiation | GO:0006367 transcription initiation from RNA polymerase II promoter	GO:0005673 transcription factor TFIIE complex	GO:0003743 translation initiation factor activity
Lsqua2749	GO:0006413 translational initiation | GO:0006367 transcription initiation from RNA polymerase II promoter	GO:0005673 transcription factor TFIIE complex	GO:0003743 translation initiation factor activity
Lsqua2751	GO:0006468 protein phosphorylation		GO:0005524 ATP binding | GO:0004674 protein serine/threonine kinase activity
Lsqua2752	GO:0016310 phosphorylation | GO:0006511 ubiquitin-dependent protein catabolic process		GO:0016301 kinase activity | GO:0016874 ligase activity
Lsqua2753	GO:0006810 transport	GO:0016021 integral to membrane
Lsqua2756	GO:0034220 ion transmembrane transport	GO:0016021 integral to membrane	GO:0005216 ion channel activity
Lsqua2757	GO:0042351 'de novo' GDP-L-fucose biosynthetic process		GO:0050577 GDP-L-fucose synthase activity | GO:0050662 coenzyme binding
Lsqua2758	GO:0042351 'de novo' GDP-L-fucose biosynthetic process		GO:0050577 GDP-L-fucose synthase activity | GO:0050662 coenzyme binding
Lsqua2759	GO:0005976 polysaccharide metabolic process		GO:0004553 hydrolase activity, hydrolyzing O-glycosyl compounds
Lsqua2761	GO:0009085 lysine biosynthetic process	GO:0005739 mitochondrion	GO:0051539 4 iron, 4 sulfur cluster binding | GO:0004409 homoaconitate hydratase activity
Lsqua2762	GO:0009423 chorismate biosynthetic process | GO:0009073 aromatic amino acid family biosynthetic process	GO:0005634 nucleus | GO:0005739 mitochondrion	GO:0003849 3-deoxy-7-phosphoheptulonate synthase activity
Lsqua2763	GO:0006412 translation	GO:0005840 ribosome	GO:0003735 structural constituent of ribosome
Lsqua2764	GO:0016192 vesicle-mediated transport | GO:0006886 intracellular protein transport	GO:0016020 membrane	GO:0005484 SNAP receptor activity
Lsqua2766	GO:0006511 ubiquitin-dependent protein catabolic process		GO:0008270 zinc ion binding | GO:0008234 cysteine-type peptidase activity
Lsqua2768	GO:0006508 proteolysis		GO:0008233 peptidase activity
Lsqua2769	GO:0005975 carbohydrate metabolic process		GO:0004553 hydrolase activity, hydrolyzing O-glycosyl compounds
Lsqua2770	GO:0005978 glycogen biosynthetic process		GO:0019903 protein phosphatase binding
Lsqua2771	GO:0016568 chromatin modification	GO:0005634 nucleus	GO:0008270 zinc ion binding
Lsqua2772	GO:0008152 metabolic process	GO:0030659 cytoplasmic vesicle membrane | GO:0005886 plasma membrane | GO:0016021 integral to membrane	GO:0004100 chitin synthase activity | GO:0020037 heme binding
Lsqua2773	GO:0008643 carbohydrate transport | GO:0015992 proton transport | GO:0015780 nucleotide-sugar transport	GO:0016021 integral to membrane | GO:0000139 Golgi membrane	GO:0005351 sugar:hydrogen symporter activity | GO:0005338 nucleotide-sugar transmembrane transporter activity
Lsqua2774	GO:0006890 retrograde vesicle-mediated transport, Golgi to ER | GO:0045332 phospholipid translocation | GO:0007033 vacuole organization | GO:0006897 endocytosis | GO:0008152 metabolic process | GO:0006812 cation transport	GO:0016021 integral to membrane | GO:0000139 Golgi membrane | GO:0030137 COPI-coated vesicle | GO:0005768 endosome	GO:0019829 cation-transporting ATPase activity | GO:0005524 ATP binding | GO:0000287 magnesium ion binding | GO:0004012 phospholipid-translocating ATPase activity
Lsqua2775	GO:0006810 transport	GO:0005622 intracellular	GO:0005215 transporter activity
Lsqua2776			GO:0008270 zinc ion binding
Lsqua2778	GO:0043547 positive regulation of GTPase activity | GO:0051056 regulation of small GTPase mediated signal transduction	GO:0005923 tight junction | GO:0005622 intracellular	GO:0005198 structural molecule activity | GO:0005096 GTPase activator activity
Lsqua2780	GO:0006334 nucleosome assembly	GO:0000786 nucleosome | GO:0005634 nucleus	GO:0003677 DNA binding | GO:0046982 protein heterodimerization activity
Lsqua2781		GO:0000502 proteasome complex
Lsqua2782	GO:0032259 methylation | GO:0008033 tRNA processing	GO:0005737 cytoplasm	GO:0016783 sulfurtransferase activity | GO:0008168 methyltransferase activity
Lsqua2785		GO:0016020 membrane
Lsqua2786	GO:0016567 protein ubiquitination		GO:0004842 ubiquitin-protein ligase activity
Lsqua2787	GO:0090305 nucleic acid phosphodiester bond hydrolysis		GO:0003676 nucleic acid binding | GO:0004527 exonuclease activity
Lsqua2788	GO:0090316 positive regulation of intracellular protein transport | GO:0071108 protein K48-linked deubiquitination | GO:0070536 protein K63-linked deubiquitination | GO:0044090 positive regulation of vacuole organization	GO:0016021 integral to membrane
Lsqua2789	GO:0009693 ethylene biosynthetic process | GO:0009790 embryo development	GO:0005829 cytosol | GO:0005886 plasma membrane
Lsqua2790	GO:0009693 ethylene biosynthetic process | GO:0009790 embryo development	GO:0005829 cytosol | GO:0005886 plasma membrane
Lsqua2792	GO:0055114 oxidation-reduction process		GO:0016491 oxidoreductase activity
Lsqua2793	GO:0006412 translation	GO:0005840 ribosome	GO:0003735 structural constituent of ribosome
Lsqua2796	GO:0008152 metabolic process		GO:0017111 nucleoside-triphosphatase activity | GO:0005524 ATP binding
Lsqua2798	GO:0006807 nitrogen compound metabolic process | GO:0016310 phosphorylation		GO:0016301 kinase activity | GO:0004356 glutamate-ammonia ligase activity
Lsqua2800	GO:0006412 translation | GO:0006810 transport	GO:0016021 integral to membrane
Lsqua2801	GO:0055114 oxidation-reduction process | GO:0008033 tRNA processing | GO:0006200 ATP catabolic process	GO:0016020 membrane	GO:0005524 ATP binding | GO:0016887 ATPase activity | GO:0050660 flavin adenine dinucleotide binding | GO:0000104 succinate dehydrogenase activity
Lsqua2803	GO:0006334 nucleosome assembly	GO:0000786 nucleosome	GO:0003677 DNA binding
Lsqua2805	GO:0006476 protein deacetylation | GO:0036047 peptidyl-lysine demalonylation | GO:0036049 peptidyl-lysine desuccinylation	GO:0005634 nucleus | GO:0005829 cytosol | GO:0005739 mitochondrion	GO:0036054 malonyllysine demalonylase activity | GO:0070403 NAD+ binding | GO:0034979 NAD-dependent protein deacetylase activity | GO:0008270 zinc ion binding | GO:0036055 succinyllysine desuccinylase activity
Lsqua2806	GO:0055085 transmembrane transport	GO:0016021 integral to membrane	GO:0022857 transmembrane transporter activity
Lsqua2808	GO:0055114 oxidation-reduction process		GO:0003842 1-pyrroline-5-carboxylate dehydrogenase activity | GO:0004029 aldehyde dehydrogenase (NAD) activity
Lsqua2809	GO:0006144 purine base metabolic process | GO:0019628 urate catabolic process | GO:0055114 oxidation-reduction process	GO:0005777 peroxisome	GO:0004846 urate oxidase activity
Lsqua2813	GO:0006352 transcription initiation, DNA-dependent		GO:0046982 protein heterodimerization activity
Lsqua2816	GO:0045454 cell redox homeostasis | GO:0006662 glycerol ether metabolic process | GO:0055114 oxidation-reduction process		GO:0016853 isomerase activity | GO:0015035 protein disulfide oxidoreductase activity
Lsqua2818	GO:0006807 nitrogen compound metabolic process		GO:0016151 nickel cation binding
Lsqua2819	GO:0000472 endonucleolytic cleavage to generate mature 5'-end of SSU-rRNA from (SSU-rRNA, 5.8S rRNA, LSU-rRNA) | GO:0032259 methylation | GO:0000480 endonucleolytic cleavage in 5'-ETS of tricistronic rRNA transcript (SSU-rRNA, 5.8S rRNA, LSU-rRNA) | GO:0000447 endonucleolytic cleavage in ITS1 to separate SSU-rRNA from 5.8S rRNA and LSU-rRNA from tricistronic rRNA transcript (SSU-rRNA, 5.8S rRNA, …	GO:0005730 nucleolus | GO:0005880 nuclear microtubule | GO:0030686 90S preribosome | GO:0032040 small-subunit processome | GO:0005737 cytoplasm	GO:0003723 RNA binding | GO:0042803 protein homodimerization activity | GO:0008168 methyltransferase activity
Lsqua2820	GO:0009058 biosynthetic process		GO:0016740 transferase activity | GO:0030170 pyridoxal phosphate binding
Lsqua2822	GO:0019629 propionate catabolic process, 2-methylcitrate cycle		GO:0047547 2-methylcitrate dehydratase activity | GO:0051537 2 iron, 2 sulfur cluster binding
Lsqua2824	GO:0016311 dephosphorylation		GO:0003993 acid phosphatase activity
Lsqua2825	GO:0018283 iron incorporation into metallo-sulfur cluster | GO:0006879 cellular iron ion homeostasis | GO:0002098 tRNA wobble uridine modification | GO:0070903 mitochondrial tRNA thio-modification | GO:0006534 cysteine metabolic process	GO:0005759 mitochondrial matrix | GO:0005634 nucleus	GO:0031071 cysteine desulfurase activity | GO:0030170 pyridoxal phosphate binding
Lsqua2827	GO:0006857 oligopeptide transport	GO:0016021 integral to membrane	GO:0005215 transporter activity
Lsqua2828	GO:0006857 oligopeptide transport	GO:0016021 integral to membrane	GO:0005215 transporter activity
Lsqua2829	GO:0006857 oligopeptide transport	GO:0016021 integral to membrane	GO:0005215 transporter activity
Lsqua2830			GO:0046872 metal ion binding
Lsqua2831	GO:0000002 mitochondrial genome maintenance	GO:0032865 ERMES complex | GO:0031307 integral to mitochondrial outer membrane
Lsqua2832	GO:0005975 carbohydrate metabolic process		GO:0016787 hydrolase activity | GO:0016740 transferase activity
Lsqua2833	GO:0055114 oxidation-reduction process		GO:0016491 oxidoreductase activity
Lsqua2835	GO:0006355 regulation of transcription, DNA-dependent		GO:0003700 sequence-specific DNA binding transcription factor activity | GO:0043565 sequence-specific DNA binding
Lsqua2836	GO:0006508 proteolysis		GO:0004177 aminopeptidase activity
Lsqua2837	GO:0006508 proteolysis		GO:0008233 peptidase activity
Lsqua2838	GO:0046777 protein autophosphorylation | GO:0061093 negative regulation of phospholipid translocation | GO:0070941 eisosome assembly	GO:0005829 cytosol | GO:0005935 cellular bud neck | GO:0005886 plasma membrane	GO:0004674 protein serine/threonine kinase activity | GO:0005524 ATP binding
Lsqua2839	GO:0006468 protein phosphorylation		GO:0005524 ATP binding | GO:0004674 protein serine/threonine kinase activity
Lsqua2840	GO:0009116 nucleoside metabolic process		GO:0004731 purine-nucleoside phosphorylase activity
Lsqua2843	GO:0090305 nucleic acid phosphodiester bond hydrolysis		GO:0004519 endonuclease activity | GO:0004527 exonuclease activity
Lsqua2845			GO:0043565 sequence-specific DNA binding
Lsqua2846	GO:0000272 polysaccharide catabolic process	GO:0005576 extracellular region	GO:0030596 alpha-L-rhamnosidase activity | GO:0004650 polygalacturonase activity
Lsqua2847	GO:0006261 DNA-dependent DNA replication | GO:0005975 carbohydrate metabolic process		GO:0003887 DNA-directed DNA polymerase activity | GO:0004553 hydrolase activity, hydrolyzing O-glycosyl compounds | GO:0004356 glutamate-ammonia ligase activity | GO:0003677 DNA binding
Lsqua2848	GO:0030163 protein catabolic process | GO:0006508 proteolysis | GO:0051301 cell division	GO:0005737 cytoplasm | GO:0000502 proteasome complex	GO:0008233 peptidase activity | GO:0005524 ATP binding | GO:0017111 nucleoside-triphosphatase activity
Lsqua2850	GO:0009313 oligosaccharide catabolic process | GO:0006013 mannose metabolic process	GO:0000329 fungal-type vacuole membrane	GO:0004559 alpha-mannosidase activity | GO:0030246 carbohydrate binding | GO:0008270 zinc ion binding
Lsqua2851	GO:0032319 regulation of Rho GTPase activity		GO:0005089 Rho guanyl-nucleotide exchange factor activity | GO:0005509 calcium ion binding | GO:0003779 actin binding
Lsqua2852			GO:0046872 metal ion binding | GO:0046982 protein heterodimerization activity
Lsqua2853	GO:0006950 response to stress	GO:0005576 extracellular region | GO:0005618 cell wall	GO:0005199 structural constituent of cell wall
Lsqua2855	GO:0006633 fatty acid biosynthetic process | GO:0055114 oxidation-reduction process	GO:0016021 integral to membrane | GO:0005783 endoplasmic reticulum	GO:0004768 stearoyl-CoA 9-desaturase activity | GO:0005506 iron ion binding | GO:0020037 heme binding
Lsqua2856	GO:0006508 proteolysis		GO:0004177 aminopeptidase activity
Lsqua2857	GO:0055085 transmembrane transport	GO:0016021 integral to membrane
Lsqua2858	GO:0006904 vesicle docking involved in exocytosis
Lsqua2863	GO:0009790 embryo development | GO:0007420 brain development | GO:0006412 translation	GO:0005840 ribosome	GO:0003735 structural constituent of ribosome | GO:0003723 RNA binding
Lsqua2865	GO:0055114 oxidation-reduction process | GO:0009416 response to light stimulus | GO:0009610 response to symbiotic fungus | GO:0042128 nitrate assimilation | GO:0006809 nitric oxide biosynthetic process	GO:0005829 cytosol | GO:0005773 vacuole | GO:0005886 plasma membrane	GO:0050463 nitrate reductase [NAD(P)H] activity | GO:0009703 nitrate reductase (NADH) activity | GO:0009055 electron carrier activity | GO:0043546 molybdopterin cofactor binding | GO:0050660 flavin adenine dinucleotide binding | GO:0020037 heme binding | GO:0005506 iron ion binding | GO:0030151 molybdenum ion binding
Lsqua2867			GO:0003676 nucleic acid binding | GO:0000166 nucleotide binding
Lsqua2869		GO:0016021 integral to membrane
Lsqua2870	GO:0006817 phosphate ion transport | GO:0055085 transmembrane transport	GO:0016021 integral to membrane	GO:0005315 inorganic phosphate transmembrane transporter activity
Lsqua2871	GO:0019388 galactose catabolic process | GO:0034599 cellular response to oxidative stress | GO:0042843 D-xylose catabolic process | GO:0019568 arabinose catabolic process | GO:0055114 oxidation-reduction process	GO:0005622 intracellular | GO:0005576 extracellular region	GO:0032866 D-xylose:NADP reductase activity | GO:0003729 mRNA binding | GO:0047935 glucose 1-dehydrogenase (NADP+) activity
Lsqua2872	GO:0000413 protein peptidyl-prolyl isomerization | GO:0006457 protein folding | GO:0006376 mRNA splice site selection	GO:0005685 U1 snRNP	GO:0003729 mRNA binding | GO:0008270 zinc ion binding | GO:0003755 peptidyl-prolyl cis-trans isomerase activity | GO:0000166 nucleotide binding
Lsqua2875	GO:0071805 potassium ion transmembrane transport	GO:0016021 integral to membrane	GO:0015079 potassium ion transmembrane transporter activity
Lsqua2878		GO:0005639 integral to nuclear inner membrane
Lsqua2879	GO:0035335 peptidyl-tyrosine dephosphorylation | GO:0000188 inactivation of MAPK activity | GO:0001706 endoderm formation	GO:0005654 nucleoplasm	GO:0017017 MAP kinase tyrosine/serine/threonine phosphatase activity | GO:0004725 protein tyrosine phosphatase activity
Lsqua2881	GO:0006508 proteolysis	GO:0016021 integral to membrane	GO:0004190 aspartic-type endopeptidase activity
Lsqua2882	GO:0007165 signal transduction
Lsqua2892	GO:0015937 coenzyme A biosynthetic process | GO:0016310 phosphorylation	GO:0005737 cytoplasm	GO:0004140 dephospho-CoA kinase activity | GO:0005524 ATP binding
Lsqua2896	GO:0055114 oxidation-reduction process		GO:0016491 oxidoreductase activity
Lsqua2898	GO:0008152 metabolic process | GO:0055085 transmembrane transport	GO:0016021 integral to membrane	GO:0022891 substrate-specific transmembrane transporter activity | GO:0016787 hydrolase activity
Lsqua2900	GO:0006629 lipid metabolic process		GO:0004806 triglyceride lipase activity
Lsqua2903	GO:0055085 transmembrane transport
Lsqua2904	GO:0000160 two-component signal transduction system (phosphorelay) | GO:0035556 intracellular signal transduction | GO:0018298 protein-chromophore linkage | GO:0006355 regulation of transcription, DNA-dependent | GO:0009584 detection of visible light | GO:0023014 signal transduction via phosphorylation event	GO:0016020 membrane	GO:0000156 two-component response regulator activity | GO:0005524 ATP binding | GO:0009881 photoreceptor activity | GO:0000155 two-component sensor activity
Lsqua2905	GO:0006357 regulation of transcription from RNA polymerase II promoter	GO:0005634 nucleus	GO:0051536 iron-sulfur cluster binding | GO:0008270 zinc ion binding | GO:0000981 sequence-specific DNA binding RNA polymerase II transcription factor activity | GO:0003677 DNA binding
Lsqua2906	GO:0006351 transcription, DNA-dependent		GO:0003899 DNA-directed RNA polymerase activity | GO:0003677 DNA binding | GO:0046983 protein dimerization activity
Lsqua2907	GO:0006351 transcription, DNA-dependent		GO:0003899 DNA-directed RNA polymerase activity | GO:0003677 DNA binding | GO:0046983 protein dimerization activity
Lsqua2908	GO:0006508 proteolysis		GO:0004222 metalloendopeptidase activity
Lsqua2909	GO:0005975 carbohydrate metabolic process		GO:0004610 phosphoacetylglucosamine mutase activity | GO:0000287 magnesium ion binding
Lsqua2910	GO:0005975 carbohydrate metabolic process		GO:0004610 phosphoacetylglucosamine mutase activity | GO:0000287 magnesium ion binding
Lsqua2912	GO:0006376 mRNA splice site selection	GO:0005685 U1 snRNP | GO:0019013 viral nucleocapsid	GO:0003729 mRNA binding
Lsqua2914	GO:0006261 DNA-dependent DNA replication	GO:0005760 gamma DNA polymerase complex	GO:0003887 DNA-directed DNA polymerase activity | GO:0003677 DNA binding
Lsqua2915	GO:0035194 posttranscriptional gene silencing by RNA		GO:0046872 metal ion binding | GO:0004386 helicase activity
Lsqua2916	GO:0006355 regulation of transcription, DNA-dependent	GO:0005634 nucleus	GO:0003700 sequence-specific DNA binding transcription factor activity | GO:0005507 copper ion binding | GO:0003677 DNA binding
Lsqua2917	GO:0055085 transmembrane transport	GO:0016021 integral to membrane
Lsqua2918		GO:0005840 ribosome
Lsqua2921	GO:0006508 proteolysis		GO:0008233 peptidase activity
Lsqua2923	GO:0006438 valyl-tRNA aminoacylation | GO:0006450 regulation of translational fidelity	GO:0005739 mitochondrion	GO:0004832 valine-tRNA ligase activity | GO:0002161 aminoacyl-tRNA editing activity | GO:0005524 ATP binding
Lsqua2926			GO:0008270 zinc ion binding
Lsqua2927	GO:0007264 small GTPase mediated signal transduction | GO:0015031 protein transport		GO:0005525 GTP binding
Lsqua2928	GO:0006633 fatty acid biosynthetic process | GO:0055114 oxidation-reduction process	GO:0005835 fatty acid synthase complex	GO:0004318 enoyl-[acyl-carrier-protein] reductase (NADH) activity
Lsqua2930	GO:0055114 oxidation-reduction process		GO:0020037 heme binding | GO:0016705 oxidoreductase activity, acting on paired donors, with incorporation or reduction of molecular oxygen | GO:0004497 monooxygenase activity | GO:0005506 iron ion binding
Lsqua2931			GO:0046983 protein dimerization activity
Lsqua2934	GO:0006355 regulation of transcription, DNA-dependent	GO:0005634 nucleus	GO:0003700 sequence-specific DNA binding transcription factor activity | GO:0043565 sequence-specific DNA binding
Lsqua2936	GO:0006505 GPI anchor metabolic process | GO:0006886 intracellular protein transport		GO:0016788 hydrolase activity, acting on ester bonds
Lsqua2939	GO:0010501 RNA secondary structure unwinding | GO:0032508 DNA duplex unwinding | GO:0009414 response to water deprivation | GO:0009651 response to salt stress | GO:0006355 regulation of transcription, DNA-dependent | GO:0009631 cold acclimation | GO:0016032 viral reproduction	GO:0019028 viral capsid	GO:0003690 double-stranded DNA binding | GO:0008270 zinc ion binding | GO:0003697 single-stranded DNA binding
Lsqua2940		GO:0000502 proteasome complex
Lsqua2941	GO:0006357 regulation of transcription from RNA polymerase II promoter	GO:0005634 nucleus	GO:0008270 zinc ion binding | GO:0000981 sequence-specific DNA binding RNA polymerase II transcription factor activity | GO:0003677 DNA binding
Lsqua2943	GO:0044262 cellular carbohydrate metabolic process | GO:0006099 tricarboxylic acid cycle | GO:0046356 acetyl-CoA catabolic process	GO:0005777 peroxisome | GO:0005739 mitochondrion	GO:0003676 nucleic acid binding | GO:0004108 citrate (Si)-synthase activity | GO:0000166 nucleotide binding
Lsqua2946	GO:0055114 oxidation-reduction process		GO:0052716 hydroquinone:oxygen oxidoreductase activity | GO:0005507 copper ion binding
Lsqua2952		GO:0005840 ribosome
Lsqua2953	GO:0006108 malate metabolic process | GO:0006099 tricarboxylic acid cycle | GO:0044262 cellular carbohydrate metabolic process	GO:0005622 intracellular	GO:0030060 L-malate dehydrogenase activity
Lsqua2954	GO:0051603 proteolysis involved in cellular protein catabolic process	GO:0005737 cytoplasm | GO:0005839 proteasome core complex | GO:0005634 nucleus	GO:0004298 threonine-type endopeptidase activity
Lsqua2955	GO:0006334 nucleosome assembly	GO:0000786 nucleosome | GO:0005634 nucleus	GO:0003677 DNA binding
Lsqua2956	GO:0008152 metabolic process		GO:0016787 hydrolase activity
Lsqua2959	GO:0006364 rRNA processing	GO:0032040 small-subunit processome
Lsqua2961	GO:0055114 oxidation-reduction process		GO:0016491 oxidoreductase activity
Lsqua2966	GO:0006508 proteolysis		GO:0008237 metallopeptidase activity | GO:0016805 dipeptidase activity | GO:0034701 tripeptidase activity | GO:0004046 aminoacylase activity | GO:0004180 carboxypeptidase activity
Lsqua2967	GO:0006457 protein folding	GO:0005832 chaperonin-containing T-complex	GO:0005524 ATP binding | GO:0051082 unfolded protein binding
Lsqua2969	GO:0006351 transcription, DNA-dependent	GO:0005634 nucleus	GO:0003677 DNA binding | GO:0016787 hydrolase activity | GO:0008270 zinc ion binding
Lsqua2970	GO:0055114 oxidation-reduction process		GO:0016491 oxidoreductase activity
Lsqua2971	GO:0008152 metabolic process		GO:0016787 hydrolase activity
Lsqua2972	GO:0008152 metabolic process		GO:0016787 hydrolase activity
Lsqua2973	GO:0006200 ATP catabolic process | GO:0046907 intracellular transport		GO:0003676 nucleic acid binding | GO:0008026 ATP-dependent helicase activity | GO:0005524 ATP binding
Lsqua2975	GO:0055085 transmembrane transport	GO:0016021 integral to membrane
Lsqua2976	GO:0032259 methylation		GO:0008168 methyltransferase activity
Lsqua2977	GO:0055085 transmembrane transport | GO:0008643 carbohydrate transport	GO:0016021 integral to membrane	GO:0022891 substrate-specific transmembrane transporter activity
Lsqua2978	GO:0006508 proteolysis		GO:0008237 metallopeptidase activity | GO:0016805 dipeptidase activity | GO:0034701 tripeptidase activity | GO:0004046 aminoacylase activity | GO:0004180 carboxypeptidase activity
Lsqua2979	GO:0006508 proteolysis		GO:0004252 serine-type endopeptidase activity
Lsqua2981	GO:0055114 oxidation-reduction process		GO:0016491 oxidoreductase activity | GO:0010181 FMN binding
Lsqua2982	GO:0055114 oxidation-reduction process		GO:0016491 oxidoreductase activity | GO:0010181 FMN binding
Lsqua2983	GO:0006200 ATP catabolic process	GO:0005634 nucleus	GO:0005524 ATP binding | GO:0016887 ATPase activity
Lsqua2984	GO:0006468 protein phosphorylation		GO:0005524 ATP binding | GO:0004674 protein serine/threonine kinase activity
Lsqua2985	GO:0006184 GTP catabolic process | GO:0042255 ribosome assembly | GO:0006364 rRNA processing	GO:0030686 90S preribosome | GO:0005634 nucleus | GO:0005739 mitochondrion	GO:0005525 GTP binding | GO:0034511 U3 snoRNA binding | GO:0003924 GTPase activity | GO:0005524 ATP binding
Lsqua2986	GO:0006306 DNA methylation		GO:0003677 DNA binding | GO:0003682 chromatin binding | GO:0008270 zinc ion binding | GO:0008168 methyltransferase activity
Lsqua2990	GO:0055085 transmembrane transport	GO:0016020 membrane	GO:0005509 calcium ion binding
Lsqua2991	GO:0006357 regulation of transcription from RNA polymerase II promoter	GO:0005634 nucleus	GO:0000981 sequence-specific DNA binding RNA polymerase II transcription factor activity | GO:0008270 zinc ion binding
Lsqua2992	GO:0031929 TOR signaling cascade	GO:0031931 TORC1 complex	GO:0046872 metal ion binding | GO:0003676 nucleic acid binding
Lsqua2993	GO:0007067 mitosis | GO:0007017 microtubule-based process	GO:0005869 dynactin complex
Lsqua2994	GO:0006457 protein folding | GO:0009408 response to heat		GO:0046872 metal ion binding | GO:0031072 heat shock protein binding | GO:0005524 ATP binding | GO:0051082 unfolded protein binding
Lsqua2995	GO:0055114 oxidation-reduction process		GO:0020037 heme binding | GO:0016705 oxidoreductase activity, acting on paired donors, with incorporation or reduction of molecular oxygen | GO:0004497 monooxygenase activity | GO:0005506 iron ion binding
Lsqua2996	GO:0006904 vesicle docking involved in exocytosis
Lsqua2997	GO:0044237 cellular metabolic process		GO:0050662 coenzyme binding | GO:0003824 catalytic activity
Lsqua2999	GO:0008152 metabolic process		GO:0003824 catalytic activity
Lsqua3000	GO:0051292 nuclear pore complex assembly | GO:0007029 endoplasmic reticulum organization | GO:0016192 vesicle-mediated transport	GO:0016021 integral to membrane | GO:0005783 endoplasmic reticulum
Lsqua3001	GO:0035690 cellular response to drug | GO:0006468 protein phosphorylation		GO:0005524 ATP binding | GO:0004674 protein serine/threonine kinase activity
Lsqua3002			GO:0008270 zinc ion binding
Lsqua3005	GO:0016075 rRNA catabolic process | GO:0006396 RNA processing		GO:0003723 RNA binding | GO:0004525 ribonuclease III activity
Lsqua3006	GO:0055114 oxidation-reduction process		GO:0020037 heme binding | GO:0016705 oxidoreductase activity, acting on paired donors, with incorporation or reduction of molecular oxygen | GO:0004497 monooxygenase activity | GO:0005506 iron ion binding | GO:0009055 electron carrier activity
Lsqua3007	GO:0008152 metabolic process		GO:0016746 transferase activity, transferring acyl groups
Lsqua3008			GO:0005507 copper ion binding
Lsqua3009	GO:0055114 oxidation-reduction process		GO:0020037 heme binding | GO:0016705 oxidoreductase activity, acting on paired donors, with incorporation or reduction of molecular oxygen | GO:0004497 monooxygenase activity | GO:0005506 iron ion binding
Lsqua3010	GO:0043547 positive regulation of GTPase activity | GO:0016310 phosphorylation | GO:0007165 signal transduction	GO:0005622 intracellular	GO:0035091 phosphatidylinositol binding | GO:0016301 kinase activity | GO:0005096 GTPase activator activity
Lsqua3011	GO:0007165 signal transduction	GO:0005622 intracellular
Lsqua3012	GO:0006098 pentose-phosphate shunt | GO:0042542 response to hydrogen peroxide	GO:0005737 cytoplasm	GO:0004345 glucose-6-phosphate dehydrogenase activity | GO:0050661 NADP binding
Lsqua3014	GO:0009311 oligosaccharide metabolic process		GO:0004573 mannosyl-oligosaccharide glucosidase activity
Lsqua3015	GO:0006200 ATP catabolic process		GO:0003676 nucleic acid binding | GO:0008026 ATP-dependent helicase activity | GO:0005524 ATP binding
Lsqua3016	GO:0032312 regulation of ARF GTPase activity | GO:0043547 positive regulation of GTPase activity		GO:0008060 ARF GTPase activator activity | GO:0008270 zinc ion binding
Lsqua3017		GO:0005634 nucleus	GO:0003676 nucleic acid binding | GO:0008270 zinc ion binding
Lsqua3018	GO:0055085 transmembrane transport | GO:0008643 carbohydrate transport	GO:0016021 integral to membrane	GO:0022891 substrate-specific transmembrane transporter activity
Lsqua3019		GO:0016021 integral to membrane
Lsqua3020	GO:0035335 peptidyl-tyrosine dephosphorylation		GO:0004725 protein tyrosine phosphatase activity
Lsqua3021	GO:0045454 cell redox homeostasis | GO:0006662 glycerol ether metabolic process | GO:0055114 oxidation-reduction process	GO:0005622 intracellular	GO:0019863 IgE binding | GO:0009055 electron carrier activity | GO:0015035 protein disulfide oxidoreductase activity
Lsqua3022	GO:0006801 superoxide metabolic process | GO:0055114 oxidation-reduction process		GO:0046872 metal ion binding | GO:0004784 superoxide dismutase activity
Lsqua3024	GO:0006412 translation	GO:0005840 ribosome	GO:0003735 structural constituent of ribosome
Lsqua3027			GO:0003676 nucleic acid binding | GO:0000166 nucleotide binding
Lsqua3028			GO:0003676 nucleic acid binding | GO:0000166 nucleotide binding
Lsqua3029	GO:0006457 protein folding | GO:0006414 translational elongation | GO:0006184 GTP catabolic process	GO:0019013 viral nucleocapsid | GO:0030529 ribonucleoprotein complex | GO:0005783 endoplasmic reticulum	GO:0003746 translation elongation factor activity | GO:0005509 calcium ion binding | GO:0003924 GTPase activity | GO:0051082 unfolded protein binding | GO:0005525 GTP binding
Lsqua3030	GO:0008152 metabolic process		GO:0016787 hydrolase activity
Lsqua3032	GO:0006526 arginine biosynthetic process	GO:0005829 cytosol	GO:0005524 ATP binding | GO:0004055 argininosuccinate synthase activity
Lsqua3033	GO:0006351 transcription, DNA-dependent	GO:0005634 nucleus	GO:0003899 DNA-directed RNA polymerase activity | GO:0003677 DNA binding | GO:0000166 nucleotide binding
Lsqua3034	GO:0055114 oxidation-reduction process	GO:0016021 integral to membrane	GO:0016491 oxidoreductase activity | GO:0008270 zinc ion binding
Lsqua3035	GO:0006357 regulation of transcription from RNA polymerase II promoter	GO:0005634 nucleus	GO:0008270 zinc ion binding | GO:0000981 sequence-specific DNA binding RNA polymerase II transcription factor activity | GO:0003677 DNA binding
[truncated: 8,501 more rows]
